# Supplementary material for: Metabolomics-Based Analyses of Dynamic Changes in Flavonoid Profiles in the Black Mulberry Winemaking Process
Source: Foods. 2023 May 31;12(11):2221. doi: 10.3390/foods12112221 (PMC10252360; doi:10.3390/foods12112221)
Supplement: Supplementary file 1 [file foods-12-02221-s001.zip › Supplementary data.1.xlsx]

## Sheet: J vs F
Number	Analysis mode	Compound name	RT(min)	m/z	Mass error	Relative content		P-value
						J	F
1	Pos	1-Pyrroline	53.7662	70.0653	1	7.17978e-06	0.00107714	0.0253009
2	Pos	Phosphoric acid	281.359	98.9845	0.999981	0.0104326	0.0258264	0.000329589
3	Pos	Adenine	162.508	136.061	0.999867	25.6895	42.7843	0.00617651
4	Pos	L-Valine	281.36	118.086	0.999802	4.92684	15.2009	0.000226055
5	Pos	Heterophylol	356.565	409.245	0.999785	0.000279754	0.00305087	0.0105769
6	Pos	Pyrrolidonecarboxylic acid	409.169	130.05	0.998922	0.232848	0.482102	0.0238062
7	Pos	2-Hydroxypyridine	48.1676	96.0447	0.998863	0.0573819	0.0792855	0.0126206
8	Pos	L-Lysine	525.512	147.113	0.998828	0.287206	0.656287	0.00886199
9	Pos	Oxolan-3-one	196.131	87.0444	0.998283	0.14903	4.58183	0.000162697
10	Pos	Niacinamide	57.1309	123.055	0.997999	0.0140785	0.192447	0.000385691
11	Pos	L-Norleucine	331.796	132.102	0.997995	0.179444	0.483321	1.33673e-07
12	Pos	Epsilon-caprolactam	45.9178	114.091	0.997964	0.00875582	0.030295	1.13229e-05
13	Pos	L-Phenylalanine	270.201	166.086	0.997922	9.65169	14.8263	0.000946907
14	Pos	Tyramine	229.89	138.091	0.997077	5.48689	16.9306	0.000451985
15	Pos	Thiamine	345.392	265.111	0.997063	0.248236	0.757629	0.000842879
16	Pos	Neotrehalose	385.595	365.105	0.99662	0.0997111	0.130091	0.000254998
17	Pos	Adenosine	172.599	268.104	0.996583	0.810117	1.28415	0.0133871
18	Pos	Ornithine	507.617	133.097	0.996556	0.0596826	0.432532	0.00359916
19	Pos	Acetylcholine	196.232	146.117	0.996119	3.3068	71.093	0.000139815
20	Pos	3-Methyladenine	246.725	150.077	0.995966	0.326752	0.783871	0.0011038
21	Pos	1-Deoxynojirimycin	84.3392	164.092	0.993934	0.0704122	0.856785	0.00400435
22	Pos	Adenosine 2'-phosphate	442.882	348.07	0.99382	0.00284205	0.00697446	0.00040434
23	Pos	Tryptamine	203.948	161.107	0.993732	0.705377	2.32032	0.00115044
24	Pos	(-)-Aspidospermine	149.536	355.245	0.99367	0.0130277	0.0416958	1.29371e-09
25	Pos	Trimethylamine N-oxide	318.774	76.0762	0.993668	0.00284515	0.00937469	7.17051e-06
26	Pos	Norvaline	38.3577	118.086	0.992884	0.0805244	3.261	5.04799e-05
27	Pos	Maltitol	392.325	367.121	0.991305	0.00477873	0.0452752	3.47271e-05
28	Pos	Arabinosylhypoxanthine	237.496	269.088	0.990779	0.000971405	0.00187743	0.00235967
29	Pos	L-Glutamic acid	409.193	148.06	0.989493	0.815586	2.42876	0.00203311
30	Pos	N-Acetylhistamine	145.79	154.092	0.988557	0.0301665	0.0538811	0.00129995
31	Pos	Erinapyrone A	271.945	143.073	0.988373	0.0157382	0.0323065	0.0038952
32	Pos	3-Methylguanine	160.292	166.072	0.987803	0.858405	1.22662	0.0131542
33	Pos	Alanyl-Leucine	246.708	203.139	0.9862	0.100742	1.15473	0.0002104
34	Pos	6-Methylquinoline	203.963	144.081	0.985203	2.44412	7.09144	0.00126088
35	Pos	Litebamine	225.421	340.163	0.984895	3.31875e-05	0.00619104	0.00366828
36	Pos	Mannitol	302.632	183.086	0.984079	0.474714	1.78014	0.000585409
37	Pos	Methylpyrazine	177.687	95.0607	0.983244	0.0305233	0.062074	0.00319476
38	Pos	Romucosine D	238.879	370.174	0.980071	7.17978e-06	0.00162688	0.00220164
39	Pos	Kynurenic acid	199.503	190.05	0.977244	7.17978e-06	0.007096	0.00115525
40	Pos	Riboflavin	227.139	377.146	0.975893	9.12258e-05	0.0104337	0.00146085
41	Pos	Pi-Methylimidazoleacetic acid	83.1963	141.066	0.974338	0.668828	6.34458	0.000771238
42	Pos	Tetramethylpyrazine	214.155	137.107	0.973282	7.17978e-06	0.0110504	0.000256367
43	Pos	Pipecolic acid	525.6	130.086	0.97268	0.104872	0.244804	0.00976281
44	Pos	Harmalan	101.495	185.107	0.971172	0.0236957	0.0365781	0.00630993
45	Pos	Sojagol	388.967	337.11	0.970828	0.00297556	0.00708661	1.17946e-05
46	Pos	5'-Deoxy-5-fluorouridine	217.529	247.078	0.970489	0.00212506	0.0476396	0.000492319
47	Pos	Metenamine	297.649	141.113	0.966026	0.125035	0.14459	0.000341598
48	Pos	Erythrono-1,4-lactone	163.262	119.035	0.965793	0.0373482	0.0646826	0.00547941
49	Pos	Pyridoxine	88.7587	170.081	0.964394	0.597555	1.8321	0.00154377
50	Pos	Pterosin K	345.276	267.107	0.96275	0.00907265	0.0249062	0.00171497
51	Pos	L-Targinine	506.469	189.134	0.962187	0.762176	1.05217	0.00360568
52	Pos	Methyl 3,4-dihydroxy-5-prenylbenzoate 3-glucoside	354.248	399.164	0.958249	7.17978e-06	0.00858064	0.00118488
53	Pos	3-Ethylpyridine	359.846	108.081	0.957355	0.0974173	0.12549	0.00154119
54	Pos	(+)-2,3-Dihydro-3-methyl-1H-pyrrole	525.637	84.0812	0.956834	0.0289604	0.0619194	0.00507608
55	Pos	Asymmetric dimethylarginine	506.389	203.15	0.956661	0.382874	0.698668	0.00285957
56	Pos	L-Proline	225.483	116.071	0.95543	0.05119	0.0709702	0.000760254
57	Pos	Cyanidin 3-(4-acetylglucoside)	174.459	491.118	0.950874	0.00563837	0.0324557	0.00420526
58	Pos	Benzidine	121.974	185.111	0.947929	0.0400388	0.102522	0.00465824
59	Pos	Perillyl aldehyde	30.8185	151.112	0.946582	0.0385713	0.166415	0.0005419
60	Pos	L-Theanine	52.6724	175.107	0.940627	0.0128269	0.924971	0.000486834
61	Pos	2-Methoxy-4-vinylphenol	220.611	151.075	0.940548	0.0040941	0.111933	0.000189263
62	Pos	Leucyl-Tyrosine	226.006	295.165	0.938838	0.0114152	0.344251	0.00121333
63	Pos	Citreoviridinol A1	332.087	421.185	0.938549	0.000139661	0.0014116	1.07933e-05
64	Pos	Glycyltyrosine	293.691	239.103	0.934895	0.00510923	0.0146844	2.00743e-05
65	Pos	Grevilline D	449.668	357.055	0.933375	0.00241059	0.00345357	0.00734241
66	Pos	(+)-Gallocatechin	177.863	307.081	0.931941	0.00604941	0.0273957	0.00649322
67	Pos	Aflatoxin P1	97.5515	299.055	0.930684	0.000105878	0.00447527	0.000351025
68	Pos	Yuccaol C	111.582	543.128	0.930193	7.17978e-06	0.0162404	0.00963348
69	Pos	1-Pyrroline-2-carboxylic acid	65.0056	114.055	0.927287	0.00977152	0.0227853	0.0025472
70	Pos	Lysyl-Tyrosine	239.8	310.174	0.926468	0.000942917	0.00437135	0.000150725
71	Pos	3,6-Ditigloyloxytropan-7-ol	222.108	338.207	0.919349	2.79834e-05	0.00496184	0.00101065
72	Pos	2-[4-(3-Hydroxypropyl)-2-methoxyphenoxy]-1,3-propanediol 1-xyloside	223.24	389.178	0.916793	0.002616	0.00395401	0.0010268
73	Pos	Alpha-dimorphecolic acid	149.449	279.231	0.915519	0.0453555	0.247501	1.97577e-08
74	Pos	Dimethylethanolamine	257.9	90.0918	0.913938	0.00977822	0.0414371	3.10073e-07
75	Pos	Leucyl-Isoleucine	200.619	245.186	0.912596	0.28532	1.58183	0.000481926
76	Pos	Citreorosein	43.7042	287.055	0.911811	0.0150399	0.034394	0.018025
77	Pos	O-Acetylethanolamine	39.705	104.071	0.911101	0.507621	2.49089	1.82994e-05
78	Pos	6''-O-Acetyldaidzin	323.223	459.141	0.90895	2.26103e-05	0.000338751	0.00698809
79	Pos	Allyl crotonate	184.966	127.073	0.906686	0.00978783	0.0153952	0.0149293
80	Pos	Phenylalanyl-Arginine	325.238	322.187	0.903473	0.000124658	0.0210542	2.2268e-05
81	Pos	7-(Methylthio)heptanenitrile	114.281	158.096	0.902709	0.00688731	13.3723	8.46287e-05
82	Pos	Ethenyl acetate	303.753	87.0445	0.902622	0.00982463	0.0275206	0.000591313
83	Pos	Tiglylglycine	359.854	158.081	0.901375	0.0162754	0.0283557	0.00219863
84	Pos	Tangeritin	302.394	395.121	0.89948	0.00151445	0.00763246	0.0279482
85	Pos	Kyotorphin	360.956	338.182	0.89915	0.000704261	0.0202792	0.00478652
86	Pos	Norbixin	344.167	381.213	0.898936	0.00209364	0.00396552	0.000275741
87	Pos	3-O-Caffeoyl-1-O-methylquinic acid	270.198	369.121	0.898934	0.00288999	0.0127713	0.000664565
88	Pos	2-Pentylfuran	30.2893	139.112	0.896756	0.0123946	0.0358461	4.93679e-06
89	Pos	4-Deacetylneosolaniol	340.773	341.159	0.893932	2.65845e-05	0.00526666	0.00135542
90	Pos	Valyl-Phenylalanine	200.619	265.154	0.893446	0.0161142	0.435268	0.000275746
91	Pos	Theogallin	364.374	345.079	0.889744	0.020067	0.0598266	2.63678e-07
92	Pos	Indole	271.302	118.065	0.888957	0.210936	0.390515	0.000992843
93	Pos	4-Ethyl-5-methyl-2-(1-methylethyl)thiazole	114.281	170.096	0.887815	0.014969	11.2974	0.000140045
94	Pos	(S,E)-Zearalenone	501.942	319.15	0.886356	0.00544206	0.00845102	0.00387918
95	Pos	Serotonin	122.174	177.102	0.883963	0.0237678	0.333845	0.00120187
96	Pos	1,2,5,6-Tetrahydro-4H-pyrrolo[3,2,1-ij]quinolin-4-one	193.014	174.091	0.878841	0.00998779	0.405941	9.80794e-05
97	Pos	Isoleucyl-Phenylalanine	189.447	279.17	0.878231	0.0197687	1.80144	0.00106962
98	Pos	Prolyl-Valine	298.454	215.139	0.87822	0.0425809	0.332649	0.000633945
99	Pos	4-Amino-2-methylenebutanoic acid	278.488	116.071	0.874404	0.0699248	0.188545	1.13687e-05
100	Pos	Prolyl-Methionine	290.394	247.111	0.872839	7.23716e-05	0.0131372	0.000381398
101	Pos	(6E)-Piperamide-C7:1	191.756	302.171	0.871804	7.17978e-06	0.0118913	0.000778062
102	Pos	Queuosine	449.366	410.166	0.870881	0.00690404	0.0125307	0.00405229
103	Pos	Phenylalanyl-Glycine	247.843	223.107	0.866305	0.0106327	0.24458	0.00244519
104	Pos	Limonene aldehyde	31.4167	167.143	0.864027	0.0116712	0.0310206	0.00718228
105	Pos	Dihydromorelloflavone	158.061	559.123	0.863593	4.02202e-05	0.474115	0.0131706
106	Pos	5,7-dihydroxy-2-(3,4,5-trihydroxyphenyl)-3,4-dihydro-2H-1-benzopyran-4-one	177.932	305.065	0.862941	0.00208457	0.023967	0.0122119
107	Pos	Glutaminylarginine	439.493	303.177	0.86247	0.00422642	0.019276	0.000888285
108	Pos	Alanyl-Arginine	422.062	246.156	0.862215	0.0638999	0.251524	0.000526019
109	Pos	(+)-12a-Hydroxypachyrrhizone	104.273	383.076	0.859434	0.00046871	0.0205784	0.0224837
110	Pos	3-Aminobutanoic acid	449.644	104.071	0.858978	0.440705	0.700171	0.00193404
111	Pos	4'-Hydroxyflurbiprofen	211.847	261.094	0.852784	0.0008325	0.00275162	0.00282407
112	Pos	Phenylalanyl-Serine	251.185	253.118	0.851109	0.00537408	0.107795	0.00394417
113	Pos	N-[2-(4-Prenyloxyphenyl)ethyl]tiglamide	238.733	288.191	0.850579	7.17978e-06	0.206411	0.00124267
114	Pos	Arginyl-Valine	365.483	274.187	0.849994	0.0450026	0.757392	0.000305295
115	Pos	Arginyl-Methionine	353.688	306.159	0.848073	0.000294286	0.0364937	0.00179585
116	Pos	L-Isoleucine	196.82	132.102	0.841547	0.0167636	0.335255	0.000157279
117	Pos	Domoic acid	206.205	312.144	0.840711	0.0270904	0.0744963	0.00219435
118	Pos	Propyl 2-furoate	114.281	155.073	0.840391	0.00716398	0.0890528	8.75294e-05
119	Pos	1,2,10-Trihydroxydihydro-trans-linalyl oxide 7-O-beta-D-glucopyranoside	354.252	383.191	0.839269	0.000125292	0.0144695	0.000969934
120	Pos	Glycyl-Isoleucine	275.527	189.123	0.837722	0.151741	1.34969	9.43378e-05
121	Pos	4-Hydroxymandelonitrile	78.0476	150.055	0.835228	0.0501879	0.225195	0.00221348
122	Pos	1-Isothiocyanato-3-phenylpropane	66.1151	178.071	0.834058	0.039501	0.17471	0.000945213
123	Pos	Norfuraneol	116.6	115.039	0.833191	0.00128469	0.0296981	0.000212012
124	Pos	D-Alanyl-D-alanine	50.4141	161.092	0.832306	0.0236679	0.0905846	0.000862664
125	Pos	1,2-Dimethoxy-13-methyl-[1,3]benzodioxolo[5,6-c]phenanthridine	401.303	348.129	0.829853	0.0101645	0.0191673	0.00800571
126	Pos	Edulone A	208.453	415.136	0.827919	3.7996e-05	0.000984338	0.00282862
127	Pos	Isopetasoside	338.55	397.22	0.825149	0.000100332	0.0032743	0.000822902
128	Pos	Morphine	398.018	286.151	0.816681	0.0286719	0.125462	0.000221872
129	Pos	3-Dehydrosphinganine	107.993	300.289	0.816472	1.99601	29.3276	0.00047402
130	Pos	D-Linalool 3-glucoside	353.143	317.193	0.809927	7.17978e-06	0.00728061	0.000215286
131	Pos	5-Butyloxazole	96.3728	126.091	0.80812	0.484859	0.814696	0.010237
132	Pos	Phytosphingosine	146.84	318.3	0.802258	4.707	13.0969	0.00627179
133	Pos	Prolyl-Alanine	345.291	187.108	0.802255	0.128245	0.52327	5.29108e-05
134	Pos	Pseudooxynicotine	229.697	179.118	0.802254	0.137863	0.332666	0.00045102
135	Pos	Prolylglycine	358.723	173.092	0.801885	0.0157664	0.0365496	4.65193e-05
136	Pos	Spirolide F	138.345	728.51	0.79981	7.17978e-06	0.00679806	0.0295159
137	Pos	Merodesmosine	440.713	403.255	0.799466	0.00382979	0.0245671	0.000904907
138	Pos	Leucyl-Serine	277.078	219.134	0.793921	0.0345991	1.00553	0.00062811
139	Pos	Isoavocadienofuran	33.9911	247.206	0.793059	0.0328704	0.174791	0.00144722
140	Pos	2-(Methylamino)benzoic acid	88.7587	152.071	0.786753	0.100568	0.278897	0.00141607
141	Pos	Pyro-L-glutaminyl-L-glutamine	132.143	258.097	0.785433	0.00134917	0.00391079	3.02751e-06
142	Pos	trans-S-(1-Propenyl)-L-cysteine	243.984	162.058	0.779781	0.103557	1.26311	0.000231008
143	Pos	Methylmalonic acid semialdehyde	122.1	103.039	0.778437	0.018437	0.0678894	0.000778049
144	Pos	Morin	178.005	303.05	0.770612	0.0113421	0.0429345	0.0320805
145	Pos	Histidinal	188.299	140.082	0.770012	4.72119e-05	0.00703706	0.0021296
146	Pos	Methylimidazole acetaldehyde	344.2	125.071	0.766354	0.0213406	0.0331823	0.00137838
147	Pos	4,8 Dimethylnonanoyl carnitine	269.06	330.263	0.766045	0.143239	1.69506	0.000381305
148	Pos	Leucyl-Threonine	250.08	233.149	0.766021	0.080344	1.78123	0.00237254
149	Pos	Nor-psi-tropine	355.36	128.107	0.76543	0.103039	0.131655	0.000222128
150	Pos	Octadecanamide	115.471	284.294	0.764393	0.0369089	3.28803	0.00057795
151	Pos	1-O-Sinapoylglucose	300.459	387.135	0.763781	0.0670995	0.184208	0.00411812
152	Pos	Quinceoxepine	29.7842	179.143	0.763024	0.0665899	0.283563	0.000310638
153	Pos	Indoleacrylic acid	307.448	188.074	0.761315	0.0119929	0.0702234	8.86131e-11
154	Pos	1-Aminocyclopropanecarboxylic acid	229.899	102.047	0.753725	0.00222173	0.0211792	0.00333162
155	Pos	20-Hydroxyeicosatetraenoic acid	29.132	321.242	0.753364	0.327661	2.42769	4.17502e-06
156	Pos	Monoethyl malonic acid	133.408	133.05	0.752483	0.050107	0.168622	0.0198674
157	Pos	3'-N'-Acetylfusarochromanone	441.831	335.156	0.752333	0.00274758	0.00912341	3.1138e-07
158	Pos	Isogingerenone B	446.353	387.199	0.742606	0.000155912	0.00165731	6.10536e-05
159	Pos	2-Methoxyestradiol	399.051	303.203	0.733289	0.00237743	0.0138433	0.00183505
160	Pos	1-Naphthaleneacetic acid	251.184	187.071	0.732164	0.010804	0.0564342	0.00164219
161	Pos	2-Phenylacetamide	42.5703	136.076	0.731951	0.00901351	0.534781	5.43562e-05
162	Pos	Allolithocholic acid	29.132	377.304	0.731432	0.0346753	0.731528	7.34041e-05
163	Pos	Corticosterone	388.972	347.229	0.729641	0.00112202	0.0252746	0.000352947
164	Pos	Quinaldine	272.406	144.081	0.72572	0.279498	0.445009	0.00323867
165	Pos	Tyrosine methylester	43.7622	196.097	0.72125	0.0269486	0.108201	0.00050788
166	Pos	2-(2-Methylbutanoyl)-9-(3-methyl-2E-pentenoyl)-2b,9a-dihydroxy-4Z,10(14)-oplopadien-3-one	429.331	431.286	0.72088	7.17978e-06	0.00218159	0.00040965
167	Pos	3-Amino-2-piperidone	94.1281	115.087	0.720286	0.0354672	0.0978863	0.00280762
168	Pos	11-Dehydro-thromboxane B2	463.267	369.224	0.719215	0.00287055	0.008755	0.00237255
169	Pos	Dehydrophytosphingosine	140.826	316.284	0.71705	2.90369	17.5926	0.00112123
170	Pos	Geranyl phenylacetate	24.5647	273.185	0.711455	0.000761566	0.0234423	2.48507e-06
171	Pos	Ceanothine D	437.351	485.308	0.703908	7.17978e-06	0.000821448	0.000211523
172	Pos	Sciadonic acid	30.2746	307.262	0.7005	0.0170155	0.581663	0.000386296
173	Pos	Isopulegone caffeate	168.123	317.182	0.69677	7.17978e-06	0.0400074	0.000515926
174	Pos	Lagerstroemine	64.1462	438.231	0.690401	5.83044e-05	0.0101384	0.000559564
175	Pos	Glucosylsphingosine	63.8744	462.343	0.687907	0.0212546	0.0296734	0.0025355
176	Pos	alpha-Hydroxy-N-desmethyltamoxifen	451.024	374.215	0.685218	0.00101208	0.00920543	0.00115833
177	Pos	Tryptophyl-Arginine	330.68	361.198	0.68372	0.000221723	0.00644755	0.00249467
178	Pos	(3''-Apiosyl-6''-malonyl)astragalin	480.223	667.171	0.68084	0.00286242	0.0067576	0.000953371
179	Pos	Lucidenic acid M	219.756	463.302	0.68019	8.21069e-05	0.00143196	0.003537
180	Pos	Glyceryl lactooleate	226.892	429.318	0.677845	7.17978e-06	0.0143909	6.33256e-05
181	Pos	1,4-Di-O-caffeoylquinic acid	189.506	517.133	0.676493	0.00171101	0.00495522	2.56696e-05
182	Pos	Verimol G	415.914	347.193	0.672302	0.00459912	0.0149816	6.49054e-05
183	Pos	Histidinyl-Leucine	308.043	269.161	0.670947	0.0444114	0.352135	1.43296e-05
184	Pos	Isoleucyl-Tryptophan	206.224	318.181	0.670532	0.0116484	0.280728	0.00217348
185	Pos	Brevianamide B	285.332	366.177	0.665834	6.60237e-05	0.000539689	0.00406796
186	Pos	Perilloside C	426.026	317.193	0.66556	0.00162853	0.0310906	0.000653858
187	Pos	Prolyl-Arginine	451.076	272.171	0.66523	0.0168082	0.0665869	0.0223903
188	Pos	3',4',5'-Trimethoxytricetin 7-[rhamnosyl-(1->6)-glucoside]	236.614	653.207	0.664643	0.00059417	0.00315208	0.000122825
189	Pos	Glandulone A	93.4908	247.133	0.664118	0.0666031	0.13639	0.000454346
190	Pos	Arachidonic acid	30.2401	305.247	0.656374	0.0274557	0.533058	0.00015788
191	Pos	Lysyl-Gamma-glutamate	455.32	275.171	0.649622	0.00283748	0.021344	0.00166707
192	Pos	Etonogestrel	567.805	325.212	0.645073	0.00262792	0.00303606	0.00594013
193	Pos	Linoleamide	140.984	280.263	0.644981	0.0378854	0.254981	0.00105675
194	Pos	Scutigeral	256.784	373.245	0.639414	0.00175114	0.0413989	0.013593
195	Pos	9H-Carbazole-3-carboxaldehyde	249.389	196.076	0.633638	0.003476	0.012484	0.000120212
196	Pos	11,12,14-Trihydroxy-7-methoxy-8,11,13-abietatrien-20,6-olide	463.264	377.203	0.632652	0.000535665	0.00393765	0.00711917
197	Pos	Trans-2, 3, 4-Trimethoxycinnamate	167.463	239.091	0.6307	0.00261048	0.00555931	0.0175918
198	Pos	Koenigine	325.029	310.153	0.630318	7.17978e-06	0.00407742	0.00161443
199	Pos	Dihydrofukinolide	344.158	393.224	0.629346	4.70369e-05	0.00412199	0.000533496
200	Pos	6,15-Diketo,13,14-dihydro-PGF1a	22.3871	369.227	0.627325	1.91809e-05	0.00870358	0.00844406
201	Pos	2-Hydroxy-6-(8-tridecenyl)benzoic acid	29.6839	319.226	0.626144	0.015981	0.25173	0.00110606
202	Pos	PA(8:0/8:0)	326.174	425.228	0.623534	1.95897e-05	0.00230576	7.1709e-05
203	Pos	Isopentyl beta-D-glucoside	146.845	251.15	0.619531	0.00644836	0.0224641	0.00116406
204	Pos	Tetraphyllin B	397.952	288.108	0.614112	0.0783388	0.194648	0.00123034
205	Pos	N-Acetyl-beta-alanine	149.085	132.066	0.613195	0.0417303	0.164988	0.000216383
206	Pos	3-Methylindole	228.751	132.081	0.609853	0.0229608	0.0431089	0.000602819
207	Pos	Capsiamide	146.632	270.279	0.605683	0.00295545	0.00818285	0.0156942
208	Pos	Lysyl-Proline	473.856	244.166	0.603778	0.0137674	0.0332968	0.000133218
209	Pos	Glycyl-Valine	367.678	175.108	0.600879	0.63173	1.01258	0.000683447
210	Pos	Melitric acid B	490.177	521.111	0.593274	7.17978e-06	0.00101455	0.00734527
211	Pos	Norepinephrine	303.197	170.081	0.586192	0.00625179	0.00884536	0.00385379
212	Pos	5,7-Dihydroxy-2',6-dimethoxyisoflavone 7-rhamnoside	174.247	461.144	0.583573	0.00338673	0.0069134	0.00426967
213	Pos	5-Methyldeoxycytidine	173.711	242.113	0.578728	0.00138362	0.0163772	1.14612e-06
214	Pos	Ubiquinone-2	435.618	319.197	0.576819	7.17978e-06	0.0120663	0.000448651
215	Pos	2-Phenylethyl beta-D-glucopyranoside	150.588	285.134	0.575231	0.00277803	0.00759625	0.000234837
216	Pos	Enterocin 900	436.168	452.251	0.574323	7.17978e-06	0.00228634	0.00241488
217	Pos	2,4-Dimethyloxazole	82.0389	98.0604	0.573113	0.0527629	0.0812607	0.00852798
218	Pos	20-Hydroxy-leukotriene E4	132.293	456.241	0.571545	0.000221282	0.0175129	0.00189773
219	Pos	6,10,14-Trimethyl-5,9,13-pentadecatrien-2-one	32.5704	263.237	0.56789	0.0908959	0.347176	4.92635e-05
220	Pos	6-Hydroxyetodolac	401.32	304.162	0.56438	0.0124559	0.0221287	0.00227095
221	Pos	Valyl-Histidine	162.232	255.145	0.562787	0.000244493	0.0427594	0.000381637
222	Pos	Perillyl acetate	31.4191	195.138	0.56128	0.0679675	0.192828	0.00168916
223	Pos	Dihydroferuperine	287.533	290.171	0.559554	0.000816651	0.0257258	0.000378026
224	Pos	Tyrosyl-Alanine	267.786	253.118	0.559168	0.00223565	0.0686587	0.017208
225	Pos	Eicosapentaenoic acid	30.2475	303.232	0.554194	0.0101265	0.101287	0.00136347
226	Pos	CPA(18:2(9Z,12Z)/0:0)	473.451	417.246	0.553846	0.000241227	0.00287134	0.00209753
227	Pos	Methyldopa	237.739	212.092	0.553089	0.0158406	0.0322556	1.36627e-05
228	Pos	1,4'-Bipiperidine-1'-carboxylic acid	192.829	213.16	0.552801	7.24513e-05	0.0163124	0.000493469
229	Pos	Osmundalactone	392.326	129.055	0.548558	0.00417532	0.0170321	2.80952e-05
230	Pos	Deoxyribose	93.0665	117.055	0.540802	0.00857697	0.0183041	7.67225e-05
231	Pos	4-(2-Furanylmethylene)-3,4-dihydro-2H-pyrrole	270.198	148.076	0.538606	0.0115002	0.0228861	0.0010714
232	Pos	2-Methyl-1-butanethiol	488.147	105.074	0.534996	0.00805307	0.0105774	0.00168784
233	Pos	LysoPC(20:3(5Z,8Z,11Z))	331.801	546.365	0.53305	9.34736e-05	0.0137213	0.00030435
234	Pos	Dihydrouracil	64.9919	115.05	0.532832	0.0039607	0.0116109	0.00156398
235	Pos	2-Ethyl-1-hexanol sulfate	363.326	211.106	0.52905	0.00843407	0.0211115	0.00684033
236	Pos	Ebastine	122.897	470.297	0.528348	0.000117609	0.00107289	0.0108226
237	Pos	Serylisoleucine	471.247	219.134	0.526372	0.00464821	0.0152282	0.0013541
238	Pos	Mangiferin 6'-gallate	177.1	575.118	0.523566	0.00887291	0.0533208	0.00112393
239	Pos	2-Bromo-1H-indole-3-carboxaldehyde	314.12	223.972	0.52315	0.00152457	0.00905248	9.75051e-08
240	Pos	5-Hydroxy-3,3',7,8-tetramethoxy-4',5'-methylenedioxyflavone	300.307	403.112	0.522592	0.00481007	0.0137107	0.000196668
241	Pos	5-Amino-2-oxopentanoic acid	79.7902	132.066	0.518994	0.0338683	0.0619911	0.000202293
242	Pos	Ethyl 2Z,4E-decadienoic acid	29.2698	197.153	0.512248	0.00306516	0.0480735	0.000172972
243	Pos	Diosbulbin B	244.762	345.127	0.510692	0.000359107	0.0114796	0.0112556
244	Pos	Cis-zeatin	187.389	220.118	0.51055	0.0105614	0.0343323	0.00222403
245	Pos	19(20)-EpDPE	355.515	345.25	0.51033	0.000400387	0.0249522	0.00103593
246	Pos	Glycine	372.172	76.0398	0.509204	0.0268789	0.0474221	0.00328233
247	Pos	D-Galactose	150.211	163.06	0.508083	0.0112593	0.0293249	0.000563668
248	Pos	Sulforhodamine B	301.229	559.151	0.506166	0.00361451	0.0128186	0.000226653
249	Pos	Tryptophyl-Phenylalanine	191.659	352.166	0.505967	0.000487168	0.0447166	0.00539861
250	Pos	Rosmaricine	455.33	346.208	0.504979	7.17978e-06	0.0124453	0.000118877
251	Pos	Vanillylamine	235.199	154.086	0.504787	0.00714826	0.0251212	0.0236953
252	Pos	Fragransin C1	25.9737	375.183	0.50095	1.44631e-05	0.00370858	0.000641244
253	Pos	2-Ethylfuran	32.4778	97.0651	0.499133	0.00970882	0.0239858	0.00299969
254	Pos	1-Propenyl propyl sulfide	62.75	117.074	0.495685	0.00531316	0.0416661	2.43233e-05
255	Pos	beta-Alanyl-L-lysine	440.65	218.15	0.493762	0.0385341	0.215121	0.000403549
256	Pos	Glycerol trihexanoate	326.025	387.272	0.493079	3.66284e-05	0.00985133	4.74054e-05
257	Pos	alpha,alpha-Dimethylanisalacetone	30.2716	205.122	0.49231	0.00817677	0.0185098	6.4604e-06
258	Pos	1-Pyrroline-5-carboxylic acid	366.56	114.055	0.49168	0.0132029	0.0206462	0.000145898
259	Pos	Dimethyl 2-galloylgalactarate	307.115	391.085	0.491127	0.00343311	0.0294104	0.000753548
260	Pos	15-Deoxy-d-12,14-PGJ2	388.967	317.218	0.489706	0.00314628	0.0271716	1.58845e-05
261	Pos	Myricanone	28.0007	357.173	0.488507	8.02725e-05	0.0109761	0.00097006
262	Pos	Valyl-Proline	275.648	215.139	0.487048	0.0335684	0.580098	0.000682013
263	Pos	desmethylclomipramine	388.961	301.151	0.486554	7.17978e-06	0.00478695	0.000361643
264	Pos	Hesperetin 3',7-O-diglucuronide	218.117	651.192	0.486463	0.000227973	0.0202832	0.00270631
265	Pos	cis-4-Hydroxy-D-proline	64.9989	132.066	0.486286	0.0230308	0.335611	0.00072174
266	Pos	Indole-3-propionic acid	270.198	190.086	0.484116	0.0187579	0.05603	3.31013e-06
267	Pos	Histidinyl-Threonine	355.356	257.124	0.483027	0.00939359	0.0195637	0.00142038
268	Pos	(2R,3R,4R)-2-Amino-4-hydroxy-3-methylpentanoic acid	285.842	148.097	0.482342	0.0193997	0.395753	0.000832074
269	Pos	Threoninyl-Phenylalanine	239.346	267.134	0.47882	0.00505552	0.0285102	0.00137635
270	Pos	2,6-diaminohexanoic acid	30.2957	147.117	0.478138	0.0389932	0.0971983	6.44271e-07
271	Pos	(7R*,8R*)-3-Methoxy-3',4,7,9,9'-pentahydroxy-8,4'-oxyneolignan 4-xyloside	376.685	497.198	0.477978	0.00570105	0.00886983	0.00143019
272	Pos	3,4-Dihydro-2H-1-benzopyran-2-one	270.184	149.06	0.477433	0.028459	0.0786429	5.71656e-05
273	Pos	Prostaglandin B1	30.2893	337.237	0.462736	0.00548507	0.389341	0.000505651
274	Pos	6-(1-Hydroxyethyl)-2,2-dimethyl-2H-1-benzopyran	51.5308	205.118	0.461026	0.0156706	0.44949	0.00103537
275	Pos	Ptelatoside A	85.4083	415.158	0.460657	0.000156116	0.00824561	0.00169176
276	Pos	(all-E)-3,5,7-Tridecatriene-9,11-diyn-1-ol	68.4016	187.108	0.455276	0.00895393	0.030823	0.00057931
277	Pos	Angelicain	301.515	293.099	0.452596	0.42398	1.57051	5.16646e-05
278	Pos	Biotin amide	78.6029	244.118	0.452416	0.0034201	0.00815506	0.000716777
279	Pos	Mahanimbinine	233.224	350.219	0.450156	7.17978e-06	0.0214653	0.00111963
280	Pos	8-Acetoxypinoresinol 4-glucoside	257.55	579.205	0.450117	9.62403e-05	0.00118862	0.00117011
281	Pos	Threoninyl-Proline	339.649	217.118	0.44792	0.0146179	0.120805	0.00025485
282	Pos	Glucosyl (2E,6E,10x)-10,11-dihydroxy-2,6-farnesadienoate	217.513	433.248	0.447919	7.17978e-06	0.00158578	0.00102558
283	Pos	Erinacine C	71.7603	435.27	0.446408	6.40498e-05	0.00568884	0.000816991
284	Pos	1-(5Z,8Z,11Z,14Z-eicosatetraenoyl)-sn-glycero-3-phosphate	463.237	459.256	0.441813	7.17978e-06	0.00153703	0.00507151
285	Pos	Vitexin 4'-O-alpha-L-Rhamnopyranoside	299.702	579.162	0.440603	0.00164169	0.00712675	2.48963e-05
286	Pos	Trimethyl-2-propenylpyrazine	171.487	163.123	0.436204	0.00449822	0.0136011	0.00239497
287	Pos	PE(22:4(7Z,10Z,13Z,16Z)/14:1(9Z))	53.6897	738.505	0.43602	0.00146542	0.00280858	0.0115649
288	Pos	8-Acetoxypinoresinol	105.949	417.154	0.433509	0.00253645	0.00564316	0.00104357
289	Pos	Tsangane L 3-glucoside	376.65	375.235	0.433448	0.0018473	0.0622982	0.0011168
290	Pos	Glycyl-Lysine	111.881	204.134	0.432613	0.0649897	0.27157	7.75626e-05
291	Pos	Dexamethasone	253.427	393.213	0.430956	0.00581617	0.0304156	0.00159599
292	Pos	Dehydroanonaine	48.1942	264.108	0.429204	0.00271475	0.00616767	0.000711865
293	Pos	Piperochromanoic acid	99.5941	357.213	0.426	0.000104966	0.00784662	0.000542274
294	Pos	2-(4-Allyl-2,6-dimethoxyphenoxy)-1-(3,4,5-trimethoxyphenyl)-1-propanol	23.5012	419.209	0.425799	6.83259e-05	0.00246936	0.000582462
295	Pos	N2-Galacturonyl-L-lysine	201.975	323.145	0.424668	4.84157e-05	0.00249602	2.46049e-05
296	Pos	Aspartyl-Isoleucine	391.205	247.129	0.424516	0.101178	0.162057	0.00746236
297	Pos	Isoleucyl-Gamma-glutamate	300.396	260.16	0.421819	0.0474698	0.456603	0.00146344
298	Pos	5',5''',8,8''-Tetrahydroxy-3',3''',4',4''',7',7''-hexamethoxy-5,5''-biflavan	249.967	663.251	0.421456	3.62411e-05	0.00198543	0.00219069
299	Pos	(4E,9a)-9-(3-Methyl-2E-pentenoyloxy)-4,10(14)-oplopadien-3-one	375.534	331.234	0.420136	0.000463804	0.0567897	0.00943934
300	Pos	Aminoadipic acid	181.62	162.076	0.419034	0.0355388	0.0717602	3.28314e-08
301	Pos	Agrocybin	218.642	148.043	0.416545	7.17978e-06	0.0665733	0.00943545
302	Pos	Muzanzagenin	80.9183	443.286	0.415528	2.63819e-05	0.005337	0.00156213
303	Pos	Tetramethylsilane	53.7251	301.147	0.412863	0.0143983	0.0193867	0.000376431
304	Pos	Austalide K	336.346	413.239	0.410535	0.000119681	0.00200002	0.00727189
305	Pos	4-Hydroxy-4-(3-pyridyl)-butanoic acid	225.429	182.081	0.407929	0.00378679	0.0252761	2.42765e-05
306	Pos	5-Nonadecyl-1,3-benzenediol	238.698	415.302	0.407437	0.00379786	0.0321663	0.00415937
307	Pos	Vaccinoside	218.797	537.16	0.404709	7.17978e-06	0.00978849	0.00222972
308	Pos	5-Methyltetrahydrofolic acid	353.366	460.203	0.402867	4.83563e-05	0.000488133	0.00143103
309	Pos	N-Acetylglutamine	409.181	189.087	0.401123	0.00786381	0.0140566	0.000188424
310	Pos	3-O-Caffeoylshikimic acid	293.085	337.098	0.399536	0.000798051	0.00316225	0.000348447
311	Pos	Danazol	63.8732	340.223	0.397679	0.000618478	0.0514074	0.01417
312	Pos	Nequinate	322.993	366.177	0.396543	7.17978e-06	0.000752474	0.00157636
313	Pos	Norpropoxyphene	307.121	326.207	0.395981	0.00262741	0.0149852	3.66476e-06
314	Pos	gamma-L-Glutamyl-L-pipecolic acid	288.924	259.129	0.394584	0.00377828	0.00858178	0.00440895
315	Pos	cis-p-Coumaric acid 4-[apiosyl-(1->2)-glucoside]	296.153	459.155	0.39332	7.17978e-06	0.00114636	0.00303208
316	Pos	8,11,14-Eicosatrienoic acid	143.901	345.213	0.392718	0.00738244	0.018247	0.0297607
317	Pos	2-Methylglutaric acid	302.634	147.065	0.391417	0.0695943	0.287637	0.000606694
318	Pos	Glutaminylvaline	127.828	246.145	0.390825	0.00962144	0.0776123	0.00172576
319	Pos	Betonicine	60.5301	160.097	0.386868	0.176093	0.287342	0.00241057
320	Pos	Octadecanedioic acid	149.266	315.253	0.386152	0.00660467	0.0558753	0.0195392
321	Pos	Isoswertiajaponin	301.361	463.134	0.379262	0.00149668	0.00779285	0.000513457
322	Pos	3-(3,4,5-Trimethoxyphenyl)propanoic acid	146.844	258.134	0.37744	0.00140161	0.00536438	0.000811685
323	Pos	Lysyl-Aspartate	149.447	262.14	0.375536	0.0218748	0.0484209	0.0120204
324	Pos	4-Methoxybenzenepropanol 1-(2-sulfoglucoside)	187.173	409.119	0.368658	0.000161865	0.0231393	0.00206048
325	Pos	Euglobal Ia1	109.55	387.224	0.364442	0.00192537	0.00456467	0.0171989
326	Pos	8(R)-Hydroperoxylinoleic acid	151.324	313.237	0.364422	0.00132731	0.0320914	0.000103205
327	Pos	2-Oxovaleric acid	301.908	117.055	0.364082	0.00565292	0.0174948	0.0120317
328	Pos	Sphinganine	115.469	302.305	0.361613	0.266906	20.9963	0.000574996
329	Pos	Piperundecalidine	283.534	368.229	0.360994	0.0026135	0.0469455	0.00400768
330	Pos	(2E,8E)-Piperamide-C9:2	131.333	328.187	0.35943	0.00919621	0.0290358	0.00635907
331	Pos	Norbuprenorphine	399.015	414.271	0.35775	7.17978e-06	0.0043105	0.000992201
332	Pos	Kanzonol F	133.421	421.208	0.354251	4.55203e-05	0.00399356	0.00010141
333	Pos	Norverapamil	90.0094	441.271	0.35367	0.00019457	0.00177286	0.0102827
334	Pos	Methionyl-Tryptophan	208.46	336.137	0.353322	0.000365718	0.0139189	0.0105915
335	Pos	Saxitoxin	231.023	300.144	0.350314	0.0348997	0.181307	1.4429e-07
336	Pos	Hydroxyprolyl-Valine	79.607	231.134	0.345843	0.00381066	0.125738	0.000703817
337	Pos	Armillaric acid	23.5012	417.194	0.34441	3.39247e-05	0.00320758	0.000513698
338	Pos	L,L-Cyclo(leucylprolyl)	94.1909	233.128	0.341611	0.00380609	0.0375386	0.00581575
339	Pos	Cadabicine methyl ether	151.447	450.244	0.340544	7.17978e-06	0.00184081	8.73919e-05
340	Pos	Thiodiglycol	74.0824	123.048	0.340015	7.17978e-06	0.0120827	0.000894618
341	Pos	L-erythro-5-(1-Hydroxyethyl)-2(5H)-furanone	302.632	129.055	0.338244	0.0848086	0.315979	0.000960578
342	Pos	Palmitic acid	122.193	274.274	0.336682	0.00422883	0.159843	0.00068261
343	Pos	Oxymorphone	433.856	302.135	0.333068	0.00417842	0.0113333	0.00370103
344	Pos	Pyrraline	51.5557	255.134	0.33057	0.000979075	0.0161748	0.000562085
345	Pos	Nicotine imine	270.2	161.107	0.330249	0.00852427	0.0230234	7.02014e-06
346	Pos	N-Acetyl-b-glucosaminylamine	88.8625	221.113	0.327947	0.00260715	0.0969308	0.00279472
347	Pos	Threoninyl-Isoleucine	481.892	233.15	0.327581	0.000359743	0.0055751	0.000306616
348	Pos	Encelin	428.268	245.113	0.326074	0.0296683	0.26529	0.000222424
349	Pos	Palmitoleoyl Ethanolamide	141.12	298.274	0.32555	0.0743851	0.602879	0.00117552
350	Pos	Plantaricin BN	132.292	485.249	0.323056	0.000215954	0.00498971	5.56377e-09
351	Pos	9,10-epoxyoctadecanoic acid	79.7902	299.258	0.323026	0.0576837	0.130589	0.000731211
352	Pos	Tetrahydroharmol	193.369	203.118	0.322116	0.0237411	0.840064	4.30736e-05
353	Pos	1,3,8-Trihydroxy-4-methyl-2,7-diprenylxanthone	116.912	395.192	0.320589	0.000484071	0.00956726	0.0198405
354	Pos	Marmeline	244.336	352.186	0.320212	8.06364e-05	0.0167259	0.000783475
355	Pos	Ganoderic acid theta	249.382	531.292	0.320079	2.9834e-05	0.00550187	0.00164216
356	Pos	Ketosantalic acid	583.776	251.16	0.31999	0.00587126	0.00973177	0.00198553
357	Pos	Resolvin D2	106.209	359.229	0.318118	0.00663867	0.0324469	0.00163999
358	Pos	Nomilinic acid 17-glucoside	249.844	713.292	0.317275	7.17978e-06	0.000593939	0.0370786
359	Pos	Nepetaside	114.01	347.171	0.316286	0.000170028	0.00831534	0.00026496
360	Pos	4-tert-Butylphenyl salicylate	165.697	271.14	0.315923	0.00167568	0.0173556	0.00048573
361	Pos	Homoclausenamide	290.322	280.137	0.315363	0.00128383	0.00620055	0.000151154
362	Pos	(R)-Higenamine	293.507	272.134	0.312188	0.0014686	0.0104011	0.000493343
363	Pos	Alanyl-Proline	158.181	187.108	0.311781	0.00414218	0.037492	0.000734683
364	Pos	2-Heptylbenzothiazole	94.5616	234.132	0.311576	0.00560892	0.01624	0.0132476
365	Pos	CPA(18:0/0:0)	226.09	421.281	0.306724	7.17978e-06	0.00411795	3.78769e-05
366	Pos	1-(9Z-hexadecenoyl)-glycero-3-phosphate	310.469	409.244	0.306526	7.17978e-06	0.000722553	0.00451869
367	Pos	Boviquinone 4	57.0774	413.275	0.306472	6.55877e-05	0.0138339	0.00062164
368	Pos	Isoleucyl-Hydroxyproline	59.3855	245.149	0.305367	0.00173508	0.258496	0.000503414
369	Pos	(1xi,3xi)-1,2,3,4-Tetrahydro-1-methyl-beta-carboline-3-carboxylic acid	248.967	231.112	0.302129	0.076629	5.77685	0.00037668
370	Pos	Tromethamine	305.246	122.081	0.301137	0.00460189	0.00983579	9.73308e-06
371	Pos	2-Pyrrolidinone	349.861	86.0605	0.99992	0.732141	0.40093	6.09261e-07
372	Pos	D-Proline	317.444	116.071	0.998816	5.69724	3.3037	5.31249e-05
373	Pos	Carbadox	354.243	263.074	0.998424	0.119078	0.0557049	2.07001e-07
374	Pos	Choline	262.363	104.107	0.997431	28.72	20.4419	0.00031593
375	Pos	L-N-(1H-Indol-3-ylacetyl)aspartic acid	286.951	291.105	0.996606	0.10802	0.0557486	0.000520024
376	Pos	N6-Methyladenosine	286.235	282.118	0.996501	0.27634	0.0147426	0.000141924
377	Pos	Ginkgolide C	247.839	441.137	0.995924	0.0172795	0.010523	0.000130554
378	Pos	4-(3,4-Dihydroxyphenyl)-2-hydroxy-1H-phenalen-1-one	273.524	305.084	0.995373	0.0607735	0.0191948	0.00933295
379	Pos	L-Histidine	396.821	156.077	0.994678	2.54096	1.61215	0.000231232
380	Pos	Guanine	237.342	152.056	0.99425	0.983055	0.347715	7.76487e-07
381	Pos	BL V	330.68	425.084	0.99399	0.00850082	0.00469916	0.00201349
382	Pos	L-gamma-Glutamyl-S-allylthio-L-cysteine	360.956	323.074	0.992962	0.098107	0.0521876	7.35653e-06
383	Pos	Deoxyadenosine	136.779	252.109	0.992925	1.81709	0.0156236	3.65369e-05
384	Pos	3alpha,4,7,7alpha-Tetrahydro-1H-isoindole-1,3(2H)-dione	205.099	152.071	0.992737	0.0572032	0.0230733	7.26961e-06
385	Pos	Rhamnazin 3-rutinoside	166.671	639.204	0.991928	0.0101821	0.00238419	5.80088e-06
386	Pos	Genistein	241.082	271.06	0.9916	0.0174115	0.00529085	0.00152481
387	Pos	D-Glutamine	383.354	147.076	0.990091	15.0447	10.8148	0.000836159
388	Pos	Hypoxanthine	173.622	137.046	0.989849	23.1577	3.29802	9.00056e-06
389	Pos	Cosmosiin	153.571	433.113	0.989751	0.116475	0.0056669	0.000254834
390	Pos	D-Serine	384.476	106.05	0.989725	1.08362	0.606224	2.1637e-05
391	Pos	20-Hydroxy-PGE2	117.684	351.214	0.989064	0.00732221	0.000331779	0.000993709
392	Pos	3-Methylcytosine	194.042	126.066	0.988318	0.918383	0.0841861	5.42834e-05
393	Pos	Kaempferol 3-alpha-L-arabinofuranoside	188.299	419.097	0.988087	0.222787	0.0186145	0.000136423
394	Pos	2-Aminoacrylic acid	385.594	88.0397	0.987877	0.137622	0.0966796	0.00142277
395	Pos	2'-O-Methyladenosine	89.6316	282.119	0.986409	0.252363	0.0806722	2.64109e-06
396	Pos	Prostaglandin G2	53.3635	351.214	0.986361	0.020163	0.00209029	0.000992566
397	Pos	1,3,5-Trihydroxybenzene	153.339	127.039	0.983941	0.117248	0.0695522	0.00154564
398	Pos	Phosphorylcholine	248.951	168.081	0.982021	0.19124	0.0982247	0.00268045
399	Pos	Pyroglutamic acid	383.342	130.05	0.981898	6.87519	4.85041	0.00113565
400	Pos	Luteolin	304.375	287.055	0.978276	0.0197539	0.00954227	0.00298841
401	Pos	Luteolin 4'-glucoside	414.782	449.108	0.977885	0.136141	0.0128235	0.000715886
402	Pos	2-Methylbutylamine	207.343	88.1125	0.975216	0.0538313	0.0239646	6.44348e-05
403	Pos	Oxfendazole	360.958	316.079	0.972507	0.0576573	0.0282037	3.91212e-05
404	Pos	7-Aminoclonazepam	215.173	286.071	0.970921	0.133826	0.0038259	0.000260294
405	Pos	Camellianin B	186.258	579.183	0.965247	0.0414669	0.0193701	0.000406355
406	Pos	Osmanthuside B	189.506	593.22	0.959978	0.00752452	0.00503635	0.000111435
407	Pos	Pyrophaeophorbide a	71.7248	535.268	0.958161	2.42704	1.08633	1.12215e-06
408	Pos	L-Tyrosine	313.513	182.081	0.958062	5.72591	0.407992	2.81533e-05
409	Pos	L-Arginine	519.516	175.119	0.954237	4.46639	0.409518	0.000683259
410	Pos	(alpha-D-mannosyl)7-beta-D-mannosyl-diacetylchitobiosyl-L-asparagine, isoform A (protein)	374.413	90.0553	0.953658	1.47799	1.15115	0.00281217
411	Pos	Garciduol B	192.779	503.095	0.953195	0.0118602	0.000341949	8.88697e-06
412	Pos	Luteolin 7-galactoside	509.693	449.108	0.945985	0.295359	0.0404389	0.00309808
413	Pos	Cyanidin 3-galactoside	486.326	449.108	0.944573	0.363366	0.0399479	0.0142115
414	Pos	5,7-Dimethoxyflavone	142.144	283.103	0.942513	0.0346696	0.0016275	0.000192534
415	Pos	beta-D-Glucosamine	138.186	180.088	0.94155	0.605608	0.248659	6.24891e-05
416	Pos	Simmondsin	509.267	376.171	0.940327	0.0013634	0.000630862	3.52668e-05
417	Pos	Luteolin 7-glucoside	536.246	449.108	0.940293	0.251819	0.0320592	0.00440712
418	Pos	Sinapyl alcohol	156.302	193.086	0.939189	0.15535	0.0718937	7.30214e-05
419	Pos	Pyrimidine	57.1737	81.0452	0.935605	0.0118753	0.00262822	0.0365304
420	Pos	1-Pentanesulfenothioic acid	141.253	137.046	0.928335	0.294715	0.0166915	0.000232213
421	Pos	a-L-Arabinofuranosyl-(1->2)-[a-D-mannopyranosyl-(1->6)]-D-mannose	385.594	475.177	0.925328	0.0327833	0.0238715	0.00700866
422	Pos	L-Gulose	257.945	203.052	0.925223	0.33662	0.192857	0.00303659
423	Pos	LysoPE(22:0/0:0)	211.851	538.387	0.924562	0.0119933	0.00174366	0.0227475
424	Pos	Peonidin-3-glucoside	127.601	463.123	0.918067	0.0253836	0.000375542	0.000366155
425	Pos	5-Oxo-2(5H)-isoxazolepropanenitrile	174.392	139.05	0.917813	0.0583274	0.0183866	0.00373923
426	Pos	2,4-Dimethylfuran	72.8173	97.0651	0.917216	0.0451492	0.00665903	3.66595e-06
427	Pos	gamma-Glutamylalanine	420.401	219.098	0.913263	0.11344	0.0718295	0.000663775
428	Pos	4'-Hydroxy-5,7-dimethoxyflavan	405.817	287.124	0.911114	0.0228992	0.00664347	4.19454e-07
429	Pos	2-Pyrrolidineacetic acid	289.297	130.097	0.898896	0.200501	0.120929	0.0116043
430	Pos	Quinone	307.168	109.029	0.894804	0.0361268	0.0160333	0.00439515
431	Pos	Moracin P	343.599	327.126	0.891107	0.0180943	0.00325342	1.58817e-06
432	Pos	Rosmic acid	468.22	391.171	0.887732	0.00814429	0.00391862	0.000114397
433	Pos	Phytyl diphosphate	159.198	457.24	0.881112	0.00616509	0.000445372	2.10052e-05
434	Pos	Anigorufone	128.928	273.094	0.88081	0.215947	0.0209423	0.000128821
435	Pos	Saccharopine	463.304	277.139	0.880453	0.044918	0.0226292	0.00235057
436	Pos	Tyramine glucuronide	248.655	314.121	0.878767	0.0164456	0.00744417	3.99844e-05
437	Pos	3-Chloro-1-(4-hydroxy-3-methoxyphenyl)-1,2-propanediol	288.07	233.063	0.874796	0.132733	0.0372849	0.000811039
438	Pos	Moracin I	184.966	325.143	0.871411	0.00438113	0.00134586	3.1163e-05
439	Pos	(R)-Marmin	478.055	333.165	0.870324	0.0033778	0.00207163	0.00278046
440	Pos	S-Cysteinosuccinic acid	464.467	238.038	0.869695	0.102153	0.0491546	0.00193353
441	Pos	17-phenyl-18,19,20-trinor-prostaglandin E2	97.5524	369.204	0.868964	0.0251302	0.00233255	0.00192523
442	Pos	3b-Hydroxy-6b-angeloyloxy-7(11)-eremophilen-12,8b-olide	76.5547	349.198	0.867124	0.03788	0.00318814	2.63924e-08
443	Pos	1-(beta-D-Ribofuranosyl)-1,4-dihydronicotinamide	163.627	257.113	0.860873	0.187392	0.0327577	0.00010748
444	Pos	Norfloxacin	387.776	320.134	0.860325	0.00523359	0.00282696	0.010075
445	Pos	Glucopyranosylmoranoline	419.312	326.144	0.856581	6.43087	2.88879	2.12255e-05
446	Pos	7-Hydroxy-3-(3-hydroxy-4-methoxybenzyl)-5-methoxy-4-chromanone	405.99	331.111	0.856391	0.02899	0.00144306	5.06732e-06
447	Pos	Piperitenone	93.4693	151.112	0.84204	0.0726751	0.0512053	0.00809831
448	Pos	Pelargonidin 3-rhamnoside	127.343	417.118	0.841173	0.00740639	0.000885171	0.00118536
449	Pos	Tyrosyl-Valine	219.873	281.142	0.83426	0.00694854	0.00371849	0.000294164
450	Pos	Dihydro-6-isopropyl-2,4-dimethyl-4H-1,3,5-dithiazine	80.6388	192.086	0.833682	1.46082	0.214299	0.00241338
451	Pos	Spinacetin	405.817	347.085	0.833138	0.0128	0.000635737	0.000450423
452	Pos	Nicotinic acid mononucleotide	346.52	256.081	0.830795	1.83617	0.287549	7.46491e-06
453	Pos	5,6-Dihydro-11-methoxyyangonin	409.176	291.119	0.827281	1.13969	0.421199	1.07368e-06
454	Pos	5,7-Dihydroxy-3',4'-dimethoxy-8-(3-hydroxy-3-methylbutyl)-isoflavone 7-glucoside	187.018	563.21	0.826357	0.0488996	0.0275263	1.51261e-05
455	Pos	Isobutyric acid	128.066	89.0601	0.820565	0.0142811	7.14839e-06	0.000158974
456	Pos	3-(4-Isopropylphenyl)propanal	97.4736	177.127	0.811535	0.0350905	0.0199637	0.00373131
457	Pos	L-beta-aspartyl-L-glycine	436.651	191.066	0.810375	0.0136136	0.00743043	0.00207885
458	Pos	2-(1-Pentenyl)furan	90.9093	137.096	0.809795	0.164302	0.0535637	1.86438e-06
459	Pos	Irilone 4'-glucoside	256.086	461.119	0.80865	0.0404981	0.000170897	0.00016014
460	Pos	2-Oxo-4-methylthiobutanoic acid	376.654	149.027	0.806544	0.0173175	0.00837433	0.000215071
461	Pos	(-)-Epiafzelechin	149.083	275.091	0.80519	0.00861827	0.00497056	0.0144871
462	Pos	PC(16:0/16:0)	163.637	734.568	0.794351	0.0867632	0.0196004	0.000378807
463	Pos	1-Isothiocyanato-7-(methylthio)heptane	393.452	204.087	0.79254	0.4304	0.298088	0.00386613
464	Pos	1-Isothiocyanato-8-(methylthio)octane	401.317	218.102	0.788991	0.161109	0.0967617	0.00297323
465	Pos	beta-D-Glucopyranosyl anthranilate	362.062	300.105	0.788002	0.0875443	0.0472446	0.00883545
466	Pos	2-Methylbutyrylglycine	337.429	160.097	0.785156	0.704897	0.384289	3.27248e-06
467	Pos	Rutacultin	436.168	275.135	0.78204	0.0467007	0.0300571	0.000210262
468	Pos	3-Methylglutarylcarnitine	232.14	290.16	0.781947	0.202477	0.0989381	4.77801e-06
469	Pos	D-Tagatose	374.412	163.06	0.780591	0.0515059	0.0162915	0.00189509
470	Pos	5'-O-Desmethyl omeprazole	340.529	332.111	0.778158	0.0183737	0.00386942	3.29391e-05
471	Pos	Linamarin	424.946	265.14	0.77286	0.0101556	0.00642814	0.000432411
472	Pos	Diaminopimelic acid	486.388	191.103	0.766834	0.0268231	0.00363268	0.00242654
473	Pos	Camelinin	171.347	262.128	0.761189	0.0106801	0.0083412	0.00220781
474	Pos	DL-Glutamate	255.664	148.06	0.760972	0.010235	0.00508999	0.000240379
475	Pos	5,10-Methylene-THF	417.059	458.187	0.754998	0.011071	0.00613502	0.000119629
476	Pos	2,2,6,7-Tetramethylbicyclo[4.3.0]nona-1(9),4-dien-8-one	91.0817	191.143	0.748135	0.195934	0.0582889	2.36618e-05
477	Pos	N-[(4E,8E)-1,3-dihydroxyoctadeca-4,8-dien-2-yl]hexadecanamide	89.657	536.503	0.740302	0.025232	0.00118366	0.000145664
478	Pos	Dihydroxyfumitremorgin C	429.425	412.182	0.737634	0.0347454	0.0143611	2.2958e-06
479	Pos	Junosidine	387.832	338.145	0.734682	0.0376805	0.0188998	8.41199e-05
480	Pos	Formyl-5-hydroxykynurenamine	300.392	209.092	0.728334	0.0123109	0.0069799	0.00369587
481	Pos	1-Hydroxy-3,6,7-trimethoxy-2-(3-methyl-2-butenyl)-8-(3-hydroxy-3-methyl-1E-butenyl)-xanthone	104.637	455.204	0.726352	0.00329945	0.000661655	5.51353e-07
482	Pos	LysoPE(18:1(9Z)/0:0)	184.961	480.308	0.724443	0.103012	0.0435424	6.7312e-06
483	Pos	3-(4-Hydroxybenzoyl)epicatechin	156.521	411.105	0.723909	0.0150315	0.00543992	0.000272181
484	Pos	beta-Damascenone	139.907	191.143	0.72153	0.0266908	0.0148662	0.00219258
485	Pos	trans-Zeatin-O-glucoside riboside	84.1066	514.218	0.716377	0.0084055	0.00397726	0.000175036
486	Pos	p-Menth-1-en-4-ol	362.851	154.134	0.716094	0.0369491	0.0271493	0.00404739
487	Pos	Hyaluronic acid	411.414	426.16	0.715969	0.0481846	0.000726705	2.1282e-06
488	Pos	L-2,3-Dihydrodipicolinate	78.4537	170.045	0.700486	0.148036	0.00496459	0.000508057
489	Pos	N-(gamma-Glutamyl)ethanolamine	382.236	191.103	0.693277	0.0369714	0.0257719	0.000557805
490	Pos	Juglone glucoside	329.709	337.09	0.688981	0.0387062	0.0225151	5.14448e-05
491	Pos	Brassicanal B	172.589	234.062	0.687267	0.00756075	0.00300306	0.000291619
492	Pos	4-O-alpha-D-Galactopyranosylcalystegine B2	427.144	338.145	0.679483	0.333709	0.106498	9.18983e-06
493	Pos	N2-Fructopyranosylarginine	525.686	337.172	0.679209	0.0330858	0.0192172	0.00663298
494	Pos	Tryptophyl-Tyrosine	415.906	368.155	0.676468	0.00739082	0.00223304	7.73322e-05
495	Pos	Sterebin A	91.1824	311.221	0.676224	0.244997	0.0440049	3.69158e-07
496	Pos	Isovalerylglutamic acid	301.515	232.118	0.674883	0.00683704	0.00424143	0.0136017
497	Pos	7-(4-Hydroxy-3-methoxyphenyl)-5-methoxy-1-phenyl-3-heptanone	406.92	343.198	0.673478	0.00608982	0.00244057	0.0030349
498	Pos	2-Hydroxyestrone	143.118	287.163	0.672605	0.0355595	0.0112799	0.00162725
499	Pos	LysoPC(P-16:0)	171.488	480.353	0.668729	0.117934	0.037449	8.32579e-06
500	Pos	2-(Ethylamino)-4,5-dihydroxybenzamide	149.087	197.092	0.664485	0.0181865	0.00699456	0.00243751
501	Pos	Methyl 2-furoate	310.467	127.039	0.662485	0.150391	0.0517812	0.0284319
502	Pos	2-[4-(3,4-Methylenedioxyphenyl)butyl]-4(1H)-quinolinone	346.33	322.149	0.658684	0.0766173	0.0490068	0.00043207
503	Pos	7-Hydroxy-5-methoxy-6,8-dimethylflavanone	197.457	299.128	0.656883	0.0261466	0.00945148	9.19357e-06
504	Pos	N-Carbamoylputrescine	380.005	132.113	0.655952	0.536149	0.0463423	2.1096e-05
505	Pos	Prulaurasin	341.908	318.095	0.653552	0.0973194	0.0119054	5.12718e-05
506	Pos	(3beta,5alpha,6beta,22E,24R)-23-Methylergosta-7,22-diene-3,5,6-triol	32.8483	445.368	0.646795	0.025182	0.0108564	1.7239e-06
507	Pos	4,5-Dimethyloxazole	411.394	98.0604	0.645448	0.0471282	0.0369044	0.00355168
508	Pos	Fumitremorgin C	462.409	380.203	0.638313	0.0138772	0.00922027	0.0077898
509	Pos	Cyanidin 3-glucoside	224.289	449.107	0.637949	10.4216	0.825734	0.000128564
510	Pos	Hypoglycin B	394.578	271.129	0.634942	0.0167281	0.00511223	2.78718e-08
511	Pos	Mangiferdesmethylursanone	29.2231	429.372	0.632055	0.0554861	0.0131191	0.000132363
512	Pos	xi-2-Mercapto-3-methyl-1-butanol	77.889	121.069	0.628474	0.071901	0.0153034	0.000303651
513	Pos	(3S,5R,6R,6'S)-6,7-Didehydro-5,6-dihydro-3,5,6'-trihydroxy-13,14,20-trinor-3'-oxo-beta,epsilon-caroten-19',11'-olide 3-acetate	254.655	629.333	0.627844	0.00535855	0.00332054	0.00281824
514	Pos	3-O-Methylniveusin A	138.699	409.183	0.62721	0.0213638	0.0123691	0.00186986
515	Pos	Homocitrulline	348.644	190.119	0.622773	0.083958	0.0216491	0.0241071
516	Pos	2-Acetylpyrrolidine	112.155	114.091	0.619363	0.147499	0.064688	1.38232e-05
517	Pos	N-(2R-Hydroxydocosanoyl)-2S-amino-1,3S,4R-octadecanetriol	120.186	656.609	0.612479	0.00566902	0.00170029	0.000577089
518	Pos	Aureol	221.423	285.039	0.610948	0.012312	0.000866297	3.45471e-06
519	Pos	2-acetyl-1-alkyl-sn-glycero-3-phosphocholine	210.712	524.37	0.606745	0.0102709	0.00191942	0.000422065
520	Pos	Mandelonitrile rutinoside	96.8984	442.171	0.601705	0.0371725	0.0153077	2.25885e-05
521	Pos	6-(alpha-D-Glucosaminyl)-1D-myo-inositol	426.075	342.139	0.598192	0.089713	0.0370976	1.45328e-05
522	Pos	N-Oleoylethanolamine	184.94	326.305	0.59343	0.00843178	0.00446224	3.14227e-05
523	Pos	(2'E,4'Z,7'Z,8E)-Colnelenic acid	153.079	293.211	0.591696	0.0573875	0.0280134	0.0086517
524	Pos	S-[1-[2-(Acetyloxy)ethyl]butyl] ethanethioate	190.559	219.102	0.589435	0.0280833	0.0123246	2.70074e-06
525	Pos	PC(20:1(11Z)/14:0)	160.298	760.584	0.583474	0.182047	0.00816706	3.85558e-05
526	Pos	PC(15:0/15:0)	165.87	706.537	0.581572	0.0439365	0.00196053	3.28603e-05
527	Pos	Italipyrone	128.885	401.159	0.581276	0.0155184	0.00796693	0.00102786
528	Pos	6-Methylcoumarin	155.823	161.06	0.578683	0.0883999	0.0412317	5.62688e-05
529	Pos	Threoninyl-Serine	459.994	207.097	0.570727	0.186725	0.0830539	3.23767e-05
530	Pos	PC(18:3(6Z,9Z,12Z)/18:1(11Z))	159.183	782.569	0.570034	0.0383346	0.00538164	0.000103944
531	Pos	PC(20:3(5Z,8Z,11Z)/16:0)	158.077	784.583	0.567279	0.0328852	0.00201655	0.000103888
532	Pos	PC(20:2(11Z,14Z)/14:0)	131.131	758.568	0.56637	0.104393	0.00708245	0.00876001
533	Pos	Dehydroisochalciporone	303.751	242.15	0.566027	0.00589103	0.00295289	0.00367859
534	Pos	Atrovirinone	186.088	457.186	0.561774	0.00616943	0.00276217	0.000275245
535	Pos	4-(Methylnitrosamino)-1-(3-pyridyl)-1-butanol glucuronide	369.732	386.165	0.561716	0.0296837	0.00475231	2.17695e-06
536	Pos	Prolylhydroxyproline	431.631	229.118	0.559575	0.0235613	0.0176679	0.000291801
537	Pos	Formiminoglutamic acid	219.762	175.071	0.559314	0.00569055	0.0035266	0.00363757
538	Pos	1-O-Caffeoylquinic acid	170.361	355.1	0.558043	0.00697934	0.00455306	0.0175528
539	Pos	2-Hydroxycinnamic acid	311.198	165.054	0.555866	0.956281	0.119697	1.38952e-05
540	Pos	Galactosylsphingosine	121.354	462.342	0.555226	0.0457307	0.022759	0.00125565
541	Pos	2-Ethoxy-4-(4-methyl-1,3-dioxolan-2-yl)phenol	77.2735	225.112	0.555088	0.0317321	0.0134831	0.000522303
542	Pos	Asparaginyl-Methionine	182.797	264.108	0.552782	0.0404136	0.00763141	3.07338e-08
543	Pos	N'-Hydroxyneosaxitoxin	289.202	332.134	0.550143	0.317755	0.0917082	2.00183e-05
544	Pos	Tetrahydropentoxyline	311.565	367.15	0.543286	0.0718917	0.00562336	0.000100287
545	Pos	Myricatomentoside I	186.052	505.206	0.542916	0.0137374	0.00560492	2.21238e-05
546	Pos	4',7-Dihydroxy-6-methoxyisoflavan	186.067	273.112	0.541644	0.0145707	0.00717653	4.06227e-05
547	Pos	Cyclopassifloside X	153.829	699.434	0.541165	0.00359312	0.000164182	0.00158139
548	Pos	PC(18:3(9Z,12Z,15Z)/14:0)	76.2506	728.531	0.540273	0.00539999	0.000873367	2.82858e-06
549	Pos	1'-Acetoxyeugenol acetate	128.844	265.107	0.537551	0.00666867	0.00302632	0.000224195
550	Pos	2'-Oxoaloesol 7-glucoside	155.869	395.131	0.534868	0.0242792	0.00994016	0.000243393
551	Pos	Corchoroside B	524.538	519.302	0.533848	0.0038449	0.00150777	0.000145548
552	Pos	Austrobailignan 7	186.258	343.154	0.532845	0.0532341	0.0233754	3.00003e-05
553	Pos	4-Pyridoxic acid	143.275	184.064	0.532844	3.14521	1.6468	0.00019445
554	Pos	5-O-Methylembelin	190.565	309.206	0.530449	0.0155866	0.00305456	0.000138219
555	Pos	4'-Methyl-(-)-epigallocatechin 3-(4-methyl-gallate)	192.78	487.121	0.529763	0.0109936	0.000388985	3.96509e-05
556	Pos	Caryophyllene alpha-oxide	104.272	221.19	0.528732	0.0283498	0.0137789	0.0003026
557	Pos	Tamarixetin	56.0103	317.065	0.527182	0.0224825	0.00862447	0.00208225
558	Pos	3-[(3-Methylbutyl)nitrosoamino]-2-butanone	473.546	187.144	0.524999	0.0530964	0.0333768	0.00447229
559	Pos	ent-1(10)-Halimene-15,19-dioic acid	62.7527	337.235	0.521994	0.0581872	0.0125515	1.73992e-05
560	Pos	Rutacridone	372.147	308.134	0.521188	0.052258	0.0161981	1.73842e-05
561	Pos	Celastrol	33.09	451.291	0.517861	0.00535911	0.00234096	0.0025687
562	Pos	(R)-2-Acetoxy-p-mentha-1,8-diene	96.9042	195.138	0.515375	0.234565	0.138174	0.00193771
563	Pos	Dihydromarasmone	435.057	281.142	0.514655	0.0125712	0.00803343	0.00752193
564	Pos	Methionyl-Asparagine	242.212	264.108	0.513781	0.0059183	0.00277115	0.00285278
565	Pos	6''-O-Malonyldaidzin	224.272	503.116	0.509986	0.00708021	0.00191463	9.96966e-07
566	Pos	L-Carnitine	359.848	162.112	0.509828	0.632799	0.228144	2.19109e-07
567	Pos	4-(4-Methyl-3-pentenyl)-3-cyclohexene-1-carboxaldehyde	90.8251	193.159	0.508661	0.0451504	0.0256882	0.00260521
568	Pos	LysoPC(20:0/0:0)	208.62	552.402	0.501247	0.00267892	5.75245e-05	0.000490523
569	Pos	(Z)-N-Feruloyl-5-hydroxyanthranilic acid	453.07	330.093	0.499303	0.0244302	0.0111756	0.00101958
570	Pos	2',4,4'-Trihydroxy-6'-methoxy-3',5'-diprenylchalcone	490.512	423.209	0.498911	0.00455991	0.00158119	0.000365638
571	Pos	Methylgingerol	62.5839	309.206	0.498525	0.236132	0.0330105	0.00571547
572	Pos	MG(18:3(6Z,9Z,12Z)/0:0/0:0)	43.9085	353.268	0.497271	0.0472105	0.00113835	0.00228319
573	Pos	PC(22:1(13Z)/14:1(9Z))	158.075	786.6	0.495345	0.0333335	0.00357636	5.65068e-05
574	Pos	3,5-Dichloro-4-hydroxy-2-methoxy-6-methylbenzoic acid	21.0645	250.988	0.494433	0.00215907	0.000938762	0.00453038
575	Pos	Citrulline	400.198	176.103	0.487364	2.10537	1.34229	0.0004757
576	Pos	(3b,6b,8a,12a)-8,12-Epoxy-7(11)-eremophilene-6,8,12-trimethoxy-3-ol	91.161	327.216	0.487067	0.0104256	0.00699113	0.00273066
577	Pos	Gibberellin A43	447.952	395.166	0.481505	0.00765457	0.00205414	1.34846e-05
578	Pos	Artonol D	184.964	499.166	0.481273	0.0043713	0.00112	0.00479008
579	Pos	Niazirinin	184.94	322.128	0.47965	0.0198709	0.00105581	7.8499e-06
580	Pos	Malonylcarnitine	91.4599	248.113	0.47769	0.0536769	0.0246994	0.000301579
581	Pos	2-Acetyl-1,5,6,7-tetrahydro-6-hydroxy-7-(hydroxymethyl)-4H-azepine-4-one	385.505	200.092	0.476131	0.0160562	0.00855579	1.01101e-05
582	Pos	Calystegine C1	346.33	192.087	0.476058	0.0179714	0.00921151	1.02728e-05
583	Pos	5-Deoxykievitol	102.018	357.133	0.474621	0.00657392	0.00143364	1.38558e-06
584	Pos	Sedanonic acid	90.0149	211.133	0.472931	0.500492	0.101406	7.18302e-06
585	Pos	5-O-Desmethyldonepezil	37.7413	366.209	0.461769	0.0378791	0.0253622	0.035601
586	Pos	Vomifoliol 9-[xylosyl-(1->6)-glucoside]	217.512	519.244	0.461069	0.00184212	0.00139389	0.00550097
587	Pos	Simulansamide	428.219	398.166	0.45911	0.0107494	0.00481027	1.49601e-05
588	Pos	N-Carbamoyl-2-amino-2-(4-hydroxyphenyl)acetic acid	409.174	211.071	0.453064	0.156887	0.0272235	8.32315e-05
589	Pos	Isoniazid alpha-ketoglutaric acid	248.948	266.074	0.451729	0.0251689	0.00771866	9.90638e-05
590	Pos	1,3,5-Bisabolatrien-10-one	494.933	219.17	0.451496	0.0761777	0.0556529	0.00247422
591	Pos	6-O-Acetylaustroinulin	35.0406	365.268	0.448272	0.0279085	0.00776854	1.19615e-05
592	Pos	Acetoacetic acid	77.3088	103.039	0.447038	0.207344	0.0134308	1.7826e-05
593	Pos	Ganoderiol D	35.0918	489.358	0.444434	0.0274427	0.00221237	0.00241364
594	Pos	N-[[3-Hydroxy-2-(2-pentenyl)cyclopentyl]acetyl]isoleucine	95.2306	326.232	0.444286	0.0153578	0.00930321	0.000195641
595	Pos	Ciceritol	107.645	519.186	0.44284	0.00819555	0.00235636	0.000277096
596	Pos	9-Hydroxy-4-methoxypsoralen	144.96	233.05	0.436464	0.0955844	0.0364612	0.00877551
597	Pos	Glucosylisomaltol	153.426	289.091	0.435739	0.0597215	0.0260344	0.000393753
598	Pos	6-Lactoyltetrahydropterin	456.579	240.108	0.433879	0.0212407	0.00964145	0.00298803
599	Pos	Isoeugenol phenylacetate	344.166	283.14	0.429562	0.0198015	0.00745796	4.0932e-07
600	Pos	4-(Glutamylamino) butanoate	429.342	233.113	0.429364	0.0474788	0.0269181	9.33077e-05
601	Pos	L-Galactose	258.527	198.097	0.427676	2.28006	1.02792	7.38355e-05
602	Pos	2,3,5,6,8,8a-Hexahydro-2,5,5,8a-tetramethyl-7H-1-benzopyran-7-one	89.6139	209.154	0.426022	0.133353	0.0598008	0.000319017
603	Pos	(3S,7E,9S)-9-Hydroxy-4,7-megastigmadien-3-one 9-glucoside	90.8243	371.206	0.423522	0.0633056	0.01822	6.63029e-08
604	Pos	Cysteinyl-Asparagine	309.268	236.076	0.422931	0.0203966	0.00193511	2.86129e-09
605	Pos	Distichonic acid A	409.193	295.113	0.420975	1.55421	0.290519	3.94891e-07
606	Pos	gamma-Glutamylaspartic acid	480.241	263.087	0.415007	0.0382134	0.0125121	0.00137209
607	Pos	7-Aminomethyl-7-carbaguanine	116.65	180.086	0.40677	0.515115	0.362358	4.23831e-05
608	Pos	2,6-Dimethoxy-4-propylphenol	130.15	197.117	0.406126	0.0294225	0.0148044	0.00742923
609	Pos	Marminal	410.267	273.108	0.401611	0.558698	0.124758	0.0169799
610	Pos	Graveoline	394.56	280.092	0.392734	0.152811	0.118662	3.9012e-06
611	Pos	Flazine methyl ether	440.591	323.109	0.389761	0.0235672	0.00452911	7.49604e-05
612	Pos	Isotrichodermin	128.993	293.171	0.387355	0.0338481	0.00816463	1.4829e-06
613	Pos	4',5,7-Trihydroxy-3'-prenylflavanone	69.5182	341.138	0.385675	0.00680293	0.00375531	0.00903752
614	Pos	Cucurbic acid	97.536	213.148	0.384099	0.0755031	0.038516	0.000744621
615	Pos	Helinorbisabone	337.407	251.124	0.379759	0.0370363	0.00579329	0.000184087
616	Pos	1-(gamma-Glutamylamino)cyclopropanecarboxylic acid	304.374	231.097	0.37494	0.0880963	0.0114708	8.62697e-05
617	Pos	N-[[3-(b-D-Glucopyranosyloxy)-2,3-dihydro-2-oxo-1H-indol-3-yl]acetyl]aspartic acid	191.093	485.151	0.371323	0.00456305	0.000827212	0.0139847
618	Pos	Abscisic acid	368.804	265.139	0.370029	0.446279	0.091237	4.3254e-08
619	Pos	Citalopram aldehyde	178.906	296.113	0.367208	0.0984096	0.0142622	2.8046e-06
620	Pos	Piplartine	537.96	318.129	0.36229	0.021659	0.0128895	0.00854713
621	Pos	Galactan	191.685	533.2	0.361084	0.00370832	0.00201899	0.000215525
622	Pos	N-gamma-L-Glutamyl-D-alanine	297.622	219.098	0.360264	0.0096363	0.0019048	0.00396723
623	Pos	N1-(2,4-Dimethoxybenzyl)-n2-(2-(pyridin-2-yl) ethyl)oxalamide	86.5434	344.17	0.3588	0.946088	0.0819814	2.54917e-05
624	Pos	alpha-Rhamnorobin	192.794	433.112	0.354283	5.35187	0.139233	4.46573e-05
625	Pos	AS 1-5	62.7403	716.566	0.354156	0.125588	0.00840529	4.00986e-06
626	Pos	2-Butylbenzothiazole	369.921	192.087	0.353946	0.0221779	0.0114295	0.000171695
627	Pos	Culinariside	122.193	802.638	0.350731	0.0228464	0.00475917	6.34245e-08
628	Pos	Corchorifatty acid A	91.1583	309.206	0.349764	0.057111	0.0222668	4.57906e-05
629	Pos	Dehydrovomifoliol	47.226	223.133	0.349525	0.0858777	0.0143096	0.00914803
630	Pos	(2S,4R,5S)-Muscarine	348.644	174.149	0.346861	0.0339527	0.013476	0.00195679
631	Pos	Juzirine	397.943	282.118	0.342153	0.0926216	0.0372812	1.26082e-05
632	Pos	Kinetin	397.937	216.087	0.341883	0.141021	0.0530588	1.79398e-05
633	Pos	PC(24:1(15Z)/14:0)	119.778	816.654	0.337519	0.161464	0.046764	0.000395881
634	Pos	N-Acetyl-a-neuraminic acid	428.238	310.113	0.33438	0.195685	0.0509745	2.89374e-06
635	Pos	(Â±)-2,2'-Iminobispropanoic acid	50.5445	162.076	0.333419	0.0526185	0.0343099	0.000246987
636	Pos	Picrotin	187.024	311.112	0.333398	0.0108487	0.00461175	1.15458e-05
637	Pos	z-Clausenamide	218.642	280.139	0.331659	0.0717256	0.0363783	1.07102e-05
638	Pos	2-Hydroxy-3-(3,4-dihydroxyphenyl)propanamide	427.13	198.076	0.330127	0.0273169	0.0161114	0.00150017
639	Pos	Fructosamine	90.0094	180.086	0.327177	3.41804	1.5991	5.47458e-08
640	Pos	Kelampayoside A	156.941	479.187	0.321914	0.00332771	0.00202111	0.000405345
641	Pos	5-(3E-Pentenyl)tetrahydro-2-oxo-3-furancarboxylic acid	308.829	199.101	0.320577	0.0735512	0.0329466	0.00346893
642	Pos	Murrayamine A	374.408	280.139	0.319836	0.143112	0.0735292	0.00185468
643	Pos	1,7-Dimethylguanosine	414.799	312.129	0.319247	0.0346943	0.0155096	0.000110876
644	Pos	gamma-Glutamylglutamic acid	438.645	277.103	0.317417	0.0207861	0.010954	0.0015316
645	Pos	5-De-O-methyltoddanol	409.193	277.103	0.312868	0.461132	0.0748618	3.92574e-05
646	Pos	L-beta-aspartyl-L-alanine	446.386	205.082	0.311597	0.01886	0.00817522	0.00313812
647	Pos	Melleolide H	342.479	431.214	0.303675	0.0103972	0.00255884	2.93295e-10
648	Pos	3-Methyl-1-(2,4,6-trihydroxyphenyl)-1-butanone	156.302	211.096	0.300913	0.0299903	0.0138868	6.74037e-05
649	Neg	Rhamnose	180.114	163.06	0.826663	0.00218864	48.8585	0.000804956
650	Neg	Cortexolone	199.908	381.177	0.771546	0.0182723	0.200549	0.0211107
651	Neg	3-(3,4-Dihydroxy-5-methoxy)-2-propenoic acid	93.6594	209.045	0.751454	0.0629159	1.99354	0.0217228
652	Neg	N,N'-diacetylchitobiose	109.236	423.17	0.670891	0.0711009	0.279454	0.0263237
653	Neg	Tyrosol	42.6297	137.06	0.614378	0.00218864	0.81666	0.00012808
654	Neg	3,4,5-Trimethoxycinnamic acid	185.869	237.077	0.552578	0.772747	2.7718	0.00804067
655	Neg	Deoxyuridine	430.668	263.041	0.449758	0.00428094	0.0542261	0.00569532
656	Neg	2-benzoylbenzene-1,3,5-triol	196.034	229.048	0.328219	1.14795	3.68049	0.0155638
Mass erro: the scoring of the secondary match and takes the value [0, 1], closer to 1 means higher accuracy.

## Sheet: F vs A
Number	Analysis mode	Compound name	RT(min)	m/z	Mass error	Relative content		P-value
						F	A
1	Pos	1-Pyrroline	53.7662	70.0653	1	0.00107714	0.0126092	1.00919e-07
2	Pos	Phosphoric acid	281.359	98.9845	0.999981	0.0258264	0.11101	2.56124e-09
3	Pos	5-Aminopentanoic acid	589.483	118.086	0.999856	5.16146	6.58511	6.11379e-05
4	Pos	Betaine	414.615	118.086	0.999427	1.14169	1.62315	8.89668e-06
5	Pos	L-Lysine	525.512	147.113	0.998828	0.656287	3.72863	1.87338e-09
6	Pos	D-Proline	317.444	116.071	0.998816	3.3037	4.15216	0.00286654
7	Pos	Carbadox	354.243	263.074	0.998424	0.0557049	0.074535	0.00134458
8	Pos	L-Norleucine	331.796	132.102	0.997995	0.483321	0.658631	1.70334e-05
9	Pos	Choline	262.363	104.107	0.997431	20.4419	29.1302	3.48912e-05
10	Pos	4-Hydroxyproline	354.238	132.066	0.997418	0.137463	0.176888	0.00757644
11	Pos	gamma-Aminobutyric acid	380.008	104.071	0.99666	16.9243	23.8648	7.80998e-05
12	Pos	Ornithine	507.617	133.097	0.996556	0.432532	1.88271	8.84932e-08
13	Pos	1-deoxy-1-(N6-lysino)-D-fructose	415.92	134.045	0.995828	1.60781	3.26948	1.77404e-05
14	Pos	4-(3,4-Dihydroxyphenyl)-2-hydroxy-1H-phenalen-1-one	273.524	305.084	0.995373	0.0191948	0.0371542	1.41701e-05
15	Pos	3-Isoxazolidinone	415.94	88.0398	0.995098	0.0975197	0.209756	3.00782e-05
16	Pos	1H-Pyrrole-2-carboxaldehyde	178.244	96.0448	0.995061	0.0337038	0.0413408	0.00466172
17	Pos	L-Histidine	396.821	156.077	0.994678	1.61215	3.79784	0.000929914
18	Pos	(-)-Aspidospermine	149.536	355.245	0.99367	0.0416958	0.0810733	9.35301e-05
19	Pos	Kaempferol 3-(6''-acetylgalactoside) 7-rhamnoside	191.893	637.189	0.99325	0.000885316	0.00313941	4.38192e-06
20	Pos	Norvaline	38.3577	118.086	0.992884	3.261	13.0721	2.85168e-05
21	Pos	Rhamnazin 3-rutinoside	166.671	639.204	0.991928	0.00238419	0.00589555	2.67097e-05
22	Pos	Arabinosylhypoxanthine	237.496	269.088	0.990779	0.00187743	0.0152826	1.13792e-05
23	Pos	Quinoline	212.994	130.065	0.989982	0.0269362	0.043847	0.000511406
24	Pos	Hypoxanthine	173.622	137.046	0.989849	3.29802	18.731	3.41357e-10
25	Pos	D-Serine	384.476	106.05	0.989725	0.606224	0.896396	0.000343556
26	Pos	L-Glutamic acid	409.193	148.06	0.989493	2.42876	5.25332	6.98045e-06
27	Pos	Cinncassiol C1 19-glucoside	222.642	543.241	0.98638	0.00377677	0.00751854	3.96832e-05
28	Pos	trans-3,3',4',5,5',7-Hexahydroxyflavanone	273.524	321.058	0.985665	0.00598798	0.0254585	6.85908e-06
29	Pos	Acetylhydrazine	311.249	75.0558	0.985304	0.00367891	0.0152652	7.68051e-06
30	Pos	Methylpyrazine	177.687	95.0607	0.983244	0.062074	0.0883851	0.00173867
31	Pos	Phosphorylcholine	248.951	168.081	0.982021	0.0982247	0.206885	1.58242e-05
32	Pos	Arecaidine	363.197	128.071	0.980767	1.52598	1.98938	0.00585338
33	Pos	Proline betaine	359.846	144.102	0.979046	10.2842	12.6752	0.00111765
34	Pos	(2R)-2-Hydroxy-2-methylbutanenitrile	54.882	100.076	0.978733	0.0363306	0.109456	4.5037e-09
35	Pos	Luteolin	304.375	287.055	0.978276	0.00954227	0.0168432	7.04993e-05
36	Pos	Lysyl-Glycine	331.807	204.134	0.976191	0.082624	0.125384	3.79052e-06
37	Pos	Diethanolamine	343.93	106.087	0.974973	0.0182827	0.0275119	0.00187211
38	Pos	Pi-Methylimidazoleacetic acid	83.1963	141.066	0.974338	6.34458	8.69008	0.0176313
39	Pos	FAPy-adenine	176.005	154.072	0.973635	0.0833642	0.15201	1.32685e-05
40	Pos	2-Isopropyl-3-methoxypyrazine	245.085	153.102	0.972719	0.00964613	0.0183265	1.16656e-05
41	Pos	Pipecolic acid	525.6	130.086	0.97268	0.244804	1.28587	7.46905e-09
42	Pos	1-Nitro-7-glutathionyl-8-hydroxy-7,8-dihydronaphthalene	461.068	497.148	0.972569	0.00184066	0.0043428	6.32298e-09
43	Pos	Harmalan	101.495	185.107	0.971172	0.0365781	0.152002	2.09412e-08
44	Pos	Sojagol	388.967	337.11	0.970828	0.00708661	0.013194	0.00365259
45	Pos	5'-Deoxy-5-fluorouridine	217.529	247.078	0.970489	0.0476396	0.258565	4.12748e-09
46	Pos	Metenamine	297.649	141.113	0.966026	0.14459	0.224966	2.87266e-09
47	Pos	Camellianin B	186.258	579.183	0.965247	0.0193701	0.0387315	0.000291152
48	Pos	Calystegin A3	307.09	160.097	0.964961	0.798499	1.08462	1.2845e-05
49	Pos	Protein serine	399.082	106.05	0.96345	0.106976	0.167426	0.00195317
50	Pos	L-Targinine	506.469	189.134	0.962187	1.05217	2.01117	6.84542e-06
51	Pos	Osmanthuside B	189.506	593.22	0.959978	0.00503635	0.0102332	5.01207e-07
52	Pos	4-(4-Hydroxyphenyl)-2-butanone O-[2-galloyl-6-cinnamoylglucoside]	190.647	609.195	0.958645	0.00414321	0.00974131	5.76465e-05
53	Pos	L-Tyrosine	313.513	182.081	0.958062	0.407992	1.13526	1.66084e-07
54	Pos	3-Ethylpyridine	359.846	108.081	0.957355	0.12549	0.151481	0.0019749
55	Pos	(+)-2,3-Dihydro-3-methyl-1H-pyrrole	525.637	84.0812	0.956834	0.0619194	0.342469	3.41145e-09
56	Pos	Asymmetric dimethylarginine	506.389	203.15	0.956661	0.698668	1.12707	0.000294957
57	Pos	L-Proline	225.483	116.071	0.95543	0.0709702	0.234175	3.45923e-05
58	Pos	(alpha-D-mannosyl)7-beta-D-mannosyl-diacetylchitobiosyl-L-asparagine, isoform A (protein)	374.413	90.0553	0.953658	1.15115	1.57751	0.00032447
59	Pos	2-Isopropylphenyl methylcarbamate	336.407	194.118	0.944366	0.285319	0.462924	0.000352351
60	Pos	Harmalol	185.946	201.102	0.942456	0.00526229	0.0190692	1.13902e-07
61	Pos	L-Theanine	52.6724	175.107	0.940627	0.924971	2.04342	3.44511e-06
62	Pos	Simmondsin	509.267	376.171	0.940327	0.000630862	0.00107351	0.000631286
63	Pos	Citreoviridinol A1	332.087	421.185	0.938549	0.0014116	0.00514577	0.000274181
64	Pos	Formylfusarochromanone	420.435	321.144	0.93416	0.000235888	0.0237294	5.07976e-06
65	Pos	Piperidine	279.397	86.0968	0.932978	1.17962	1.79079	0.000298238
66	Pos	Diisopropyl sulfide	310.467	119.09	0.932253	0.162517	0.376664	1.77802e-08
67	Pos	1-(1-Pyrrolidinyl)-2-propanone	331.785	128.107	0.932248	8.60451	12.0787	1.09539e-05
68	Pos	2'-Hydroxyacetophenone	50.558	137.06	0.931785	0.0731906	0.103728	0.000818133
69	Pos	L-Histidinol	345.306	142.097	0.930847	0.316476	0.567596	7.16173e-06
70	Pos	Aflatoxin P1	97.5515	299.055	0.930684	0.00447527	0.0234661	2.63722e-07
71	Pos	3-Methylhistidine	397.872	170.092	0.928953	0.154003	0.241227	0.000363188
72	Pos	1-Pentanesulfenothioic acid	141.253	137.046	0.928335	0.0166915	0.0335378	0.000127614
73	Pos	2-(1-Pyrrolidinyl)-3-pentanone	170.078	156.138	0.927173	0.0283551	0.0378676	0.000434571
74	Pos	(Â±)-erythro-Isoleucine	279.397	132.102	0.918342	8.53313	14.2102	3.87756e-05
75	Pos	5-Oxo-2(5H)-isoxazolepropanenitrile	174.392	139.05	0.917813	0.0183866	0.0480361	2.80782e-06
76	Pos	Alpha-dimorphecolic acid	149.449	279.231	0.915519	0.247501	0.4721	1.73556e-08
77	Pos	Dimethylethanolamine	257.9	90.0918	0.913938	0.0414371	0.375046	1.25107e-06
78	Pos	gamma-Glutamylalanine	420.401	219.098	0.913263	0.0718295	0.108364	0.000323808
79	Pos	Citreorosein	43.7042	287.055	0.911811	0.034394	0.215146	0.00028192
80	Pos	4'-Hydroxy-5,7-dimethoxyflavan	405.817	287.124	0.911114	0.00664347	0.0214926	1.72914e-07
81	Pos	O-Acetylethanolamine	39.705	104.071	0.911101	2.49089	3.53093	0.000958958
82	Pos	6''-O-Acetyldaidzin	323.223	459.141	0.90895	0.000338751	0.00159835	2.21872e-06
83	Pos	Calystegine B2	305.533	176.092	0.905161	0.3234	0.471409	1.20775e-06
84	Pos	7-(Methylthio)heptanenitrile	114.281	158.096	0.902709	13.3723	17.8348	0.00125371
85	Pos	N-Lactoyl ethanolamine	170.094	134.081	0.899383	0.0153039	0.0569126	8.28442e-08
86	Pos	Norbixin	344.167	381.213	0.898936	0.00396552	0.00842072	7.06228e-07
87	Pos	1,2,5-Trimethyl-1H-pyrrole	331.791	110.097	0.898171	0.80853	1.14782	1.23766e-06
88	Pos	2,6-Dimethylpyridine	35.9021	108.081	0.892945	0.00810458	0.0215836	0.0134661
89	Pos	10-Hydroxy-3-methoxy-1,3,5,7-cadinatetraen-9-one	428.252	261.144	0.890451	0.0929843	0.129356	0.00195832
90	Pos	Theogallin	364.374	345.079	0.889744	0.0598266	0.164123	3.54661e-09
91	Pos	4-Ethyl-5-methyl-2-(1-methylethyl)thiazole	114.281	170.096	0.887815	11.2974	14.9753	0.0022503
92	Pos	2-Furanmethanol	372.744	99.05	0.883525	0.00639241	0.0129454	0.00103001
93	Pos	Enalaprilat	444.055	349.172	0.879931	0.00463835	0.00744088	0.000185478
94	Pos	N-(5-Methyl-3-oxohexyl)alanine	359.848	202.144	0.87976	2.4666	3.08166	0.00387851
95	Pos	1,2,5,6-Tetrahydro-4H-pyrrolo[3,2,1-ij]quinolin-4-one	193.014	174.091	0.878841	0.405941	0.519706	0.00371607
96	Pos	Prolyl-Valine	298.454	215.139	0.87822	0.332649	0.541662	0.000580297
97	Pos	Squamolone	154.775	129.066	0.871813	0.0623125	0.114383	0.000108513
98	Pos	3-Acetamidobutanal	132.287	130.086	0.858459	0.0226541	0.0438315	0.000289348
99	Pos	L-prolyl-L-proline	376.645	213.123	0.855097	0.0539276	0.0987233	0.000256467
100	Pos	4-Trimethylammoniobutanoic acid	252.575	146.117	0.847796	0.856396	2.0508	1.75906e-08
101	Pos	L-Isoleucine	196.82	132.102	0.841547	0.335255	7.22431	5.01619e-07
102	Pos	N6-Acetyl-L-lysine	358.771	189.123	0.840569	0.11679	0.266428	1.02464e-06
103	Pos	Propyl 2-furoate	114.281	155.073	0.840391	0.0890528	0.132415	7.30001e-05
104	Pos	Matsutakeside I	192.687	621.215	0.838991	0.00128754	0.00415016	0.000232389
105	Pos	L-2-Amino-5-hydroxypentanoic acid	337.528	134.081	0.838431	0.291018	0.395433	0.00278883
106	Pos	D-Alanyl-D-alanine	50.4141	161.092	0.832306	0.0905846	0.733739	3.30304e-06
107	Pos	Edulone A	208.453	415.136	0.827919	0.000984338	0.00652888	0.000345283
108	Pos	5,7-Dihydroxy-3',4'-dimethoxy-8-(3-hydroxy-3-methylbutyl)-isoflavone 7-glucoside	187.018	563.21	0.826357	0.0275263	0.0445719	3.87113e-06
109	Pos	1-Formylneogrifolin	537.917	357.249	0.823801	0.401276	0.556503	0.00894854
110	Pos	(9S,10S)-10-hydroxy-9-(phosphonooxy)octadecanoate	414.794	397.244	0.821234	0.000177039	0.00793436	0.00014447
111	Pos	Isobutyric acid	128.066	89.0601	0.820565	7.14839e-06	9.05107e-06	8.42782e-05
112	Pos	N-Carboxyethyl-g-aminobutyric acid	135.916	176.092	0.819718	0.0537161	0.50653	1.33474e-09
113	Pos	Morphine	398.018	286.151	0.816681	0.125462	0.256608	5.57891e-06
114	Pos	2-(1-Pentenyl)furan	90.9093	137.096	0.809795	0.0535637	0.0763265	0.0104272
115	Pos	Prolyl-Alanine	345.291	187.108	0.802255	0.52327	0.834613	3.65578e-06
116	Pos	Prolylglycine	358.723	173.092	0.801885	0.0365496	0.059222	0.00186123
117	Pos	Alcoifosfamide	308.223	279.039	0.801694	0.00212905	0.0794524	2.7679e-06
118	Pos	Perilloside A	525.663	315.188	0.801112	0.000120766	0.00350925	0.00179455
119	Pos	N-Acetylneuraminic acid	104.954	310.114	0.797475	0.0143946	0.0770107	8.10608e-09
120	Pos	Norfluoxetine	395.736	296.134	0.790609	0.501337	0.859261	7.26851e-06
121	Pos	Citreovirenone	151.936	249.116	0.788259	0.00226744	0.0203789	5.75212e-08
122	Pos	2-Methylbutyrylglycine	337.429	160.097	0.785156	0.384289	0.65515	9.46798e-06
123	Pos	1-Ethyl-1H-pyrrole-2-carboxaldehyde	38.1372	124.076	0.783139	0.00979013	0.0292141	0.00038404
124	Pos	Rutarin	190.666	425.141	0.778168	0.00707246	0.0141571	5.837e-07
125	Pos	Diaminopimelic acid	486.388	191.103	0.766834	0.00363268	0.00962528	2.72877e-05
126	Pos	Methylimidazole acetaldehyde	344.2	125.071	0.766354	0.0331823	0.0857606	7.95272e-06
127	Pos	4,8 Dimethylnonanoyl carnitine	269.06	330.263	0.766045	1.69506	4.38318	4.18998e-07
128	Pos	Flazine	208.46	309.087	0.765408	0.00532277	0.0356564	0.00209601
129	Pos	N-Methylsalsolinol	492.534	194.118	0.761696	0.0667124	0.0864856	0.000172661
130	Pos	Indoleacrylic acid	307.448	188.074	0.761315	0.0702234	0.148226	4.6604e-06
131	Pos	Camelinin	171.347	262.128	0.761189	0.0083412	0.0137139	0.00268554
132	Pos	Lysyl-Valine	534.485	246.181	0.757398	0.777056	1.24099	8.29823e-05
133	Pos	N6-cis-p-Coumaroylserotonin	482.505	323.145	0.748181	0.00240004	0.00519418	3.49533e-07
134	Pos	Orcein	190.647	501.158	0.747761	0.00125002	0.00261651	7.79235e-07
135	Pos	2,6 Dimethylheptanoyl carnitine	308.951	302.233	0.74436	0.0206664	0.0766818	6.34512e-06
136	Pos	Pandamarilactam 3x	68.3568	236.132	0.738891	0.0128727	0.0454332	2.41889e-07
137	Pos	Casuarine 6-alpha-D-glucoside	336.75	368.155	0.735222	0.00194715	0.00472496	0.000144972
138	Pos	Dihydro-5-methyl-2(3H)-furanone	392.341	101.06	0.729261	0.00637243	0.0226209	6.35185e-08
139	Pos	1,2,3,4-Tetrahydro-beta-carboline	140.292	173.107	0.724449	0.0100446	0.0147711	0.000210366
140	Pos	3'-Methoxyfukiic acid	385.591	287.084	0.718425	0.0215404	0.0443856	0.00391841
141	Pos	3-Aminocaproic acid	35.9057	132.102	0.713436	0.0504918	0.167518	0.000915408
142	Pos	4-Ethyl-2-heptylthiazole	53.7655	212.143	0.711867	0.0062053	0.0348485	2.42928e-08
143	Pos	Homocarnosine	181.356	241.129	0.70529	0.00530274	0.0258401	1.70802e-08
144	Pos	Fragransin B2	68.4008	405.191	0.701825	0.00135807	0.00228367	0.000836357
145	Pos	2-Keto-6-acetamidocaproate	94.1855	188.092	0.694111	0.0123666	0.0218522	4.10329e-06
146	Pos	N-(gamma-Glutamyl)ethanolamine	382.236	191.103	0.693277	0.0257719	0.0499787	8.52359e-06
147	Pos	Triethylamine	35.8579	102.128	0.691776	0.102976	0.184853	0.0180401
148	Pos	Sterebin A	91.1824	311.221	0.676224	0.0440049	0.0983828	1.76988e-05
149	Pos	7-(4-Hydroxy-3-methoxyphenyl)-5-methoxy-1-phenyl-3-heptanone	406.92	343.198	0.673478	0.00244057	0.010432	0.00602645
150	Pos	Fagomine	337.411	148.097	0.670188	0.361036	0.532158	9.00278e-05
151	Pos	Brevianamide B	285.332	366.177	0.665834	0.000539689	0.00770114	1.9921e-05
152	Pos	Prolyl-Arginine	451.076	272.171	0.66523	0.0665869	0.129401	0.00256674
153	Pos	2-(Ethylamino)-4,5-dihydroxybenzamide	149.087	197.092	0.664485	0.00699456	0.00949661	0.00211011
154	Pos	N-Carbamoylputrescine	380.005	132.113	0.655952	0.0463423	0.242026	1.71782e-08
155	Pos	2-(4-Methyl-3-pentenyl)anthraquinone	386.715	291.13	0.653549	0.00193512	0.00292958	0.00319347
156	Pos	N-Acetyl-D-glucosamine	256.906	222.097	0.653292	0.0160902	0.0713288	0.000607587
157	Pos	Dibenzyl ether	383.356	199.108	0.646632	0.0254274	0.0446317	0.00134702
158	Pos	Etonogestrel	567.805	325.212	0.645073	0.00303606	0.00372795	0.00346509
159	Pos	6-Phosphonoglucono-D-lactone	345.555	259.005	0.640538	6.45449e-05	0.00329529	0.0151323
160	Pos	Hypoglycin B	394.578	271.129	0.634942	0.00511223	0.00757074	0.000387016
161	Pos	Koenigine	325.029	310.153	0.630318	0.00407742	0.00663858	0.00799556
162	Pos	3-O-Methylniveusin A	138.699	409.183	0.62721	0.0123691	0.0150411	0.00249282
163	Pos	Lucernol	177.816	285.047	0.620222	0.00435334	0.00602691	0.00420036
164	Pos	Isopentyl beta-D-glucoside	146.845	251.15	0.619531	0.0224641	0.150662	3.03006e-09
165	Pos	2-Acetylpyrrolidine	112.155	114.091	0.619363	0.064688	0.169984	3.23427e-07
166	Pos	Allyl benzoate	184.756	207.105	0.608935	0.0698641	0.746671	1.15794e-10
167	Pos	5-Aminopentanal	245.071	102.092	0.604889	0.0100768	0.039571	1.80589e-05
168	Pos	Lysyl-Proline	473.856	244.166	0.603778	0.0332968	0.0665418	2.15712e-05
169	Pos	Calystegine B5	123.118	176.092	0.601719	0.0696813	0.263912	1.26048e-08
170	Pos	Glycyl-Valine	367.678	175.108	0.600879	1.01258	1.50251	0.00019902
171	Pos	5-Amino-3-oxohexanoate	364.322	146.081	0.596123	16.006	21.0977	0.00247373
172	Pos	Melitric acid B	490.177	521.111	0.593274	0.00101455	0.00329971	8.03267e-06
173	Pos	N-Methylcalystegine C1	183.856	206.102	0.592657	0.550415	8.2811	2.14612e-11
174	Pos	S-[1-[2-(Acetyloxy)ethyl]butyl] ethanethioate	190.559	219.102	0.589435	0.0123246	0.0346982	8.89397e-08
175	Pos	5,7-Dihydroxy-2',6-dimethoxyisoflavone 7-rhamnoside	174.247	461.144	0.583573	0.0069134	0.0115303	0.000481525
176	Pos	Ethyl 1-naphthylacetic acid	256.775	215.103	0.582128	0.0226398	0.0451071	0.000351705
177	Pos	Italipyrone	128.885	401.159	0.581276	0.00796693	0.0217651	7.52443e-07
178	Pos	2-Phenylethyl beta-D-glucopyranoside	150.588	285.134	0.575231	0.00759625	0.0460592	7.79381e-09
179	Pos	Enterocin 900	436.168	452.251	0.574323	0.00228634	0.015346	5.56612e-08
180	Pos	2,4-Dimethyloxazole	82.0389	98.0604	0.573113	0.0812607	0.175624	3.77736e-06
181	Pos	Ethyl 2-mercaptopropionate	415.92	135.048	0.569359	0.0630035	0.141661	0.000401891
182	Pos	6-Hydroxyetodolac	401.32	304.162	0.56438	0.0221287	0.0435652	1.17538e-05
183	Pos	Valyl-Histidine	162.232	255.145	0.562787	0.0427594	0.105487	9.53241e-07
184	Pos	Perillyl acetate	31.4191	195.138	0.56128	0.192828	0.641695	0.00192544
185	Pos	Prolylhydroxyproline	431.631	229.118	0.559575	0.0176679	0.0210283	0.00436684
186	Pos	Formiminoglutamic acid	219.762	175.071	0.559314	0.0035266	0.0250183	1.85262e-05
187	Pos	1-O-Caffeoylquinic acid	170.361	355.1	0.558043	0.00455306	0.00793425	9.07692e-06
188	Pos	2-Hydroxycinnamic acid	311.198	165.054	0.555866	0.119697	0.430529	6.24583e-07
189	Pos	N6-Acetyl-5S-hydroxy-L-lysine	385.596	205.118	0.554184	0.174662	0.257166	0.000141076
190	Pos	CPA(18:2(9Z,12Z)/0:0)	473.451	417.246	0.553846	0.00287134	0.00551777	0.000264397
191	Pos	Methyldopa	237.739	212.092	0.553089	0.0322556	0.0590186	0.0015317
192	Pos	Dihydro-4,6-dimethyl-2-(1-methylpropyl)-4H-1,3,5-dithiazine	158.726	206.102	0.540507	0.298229	2.85673	6.29375e-08
193	Pos	1'-Acetoxyeugenol acetate	128.844	265.107	0.537551	0.00302632	0.00921567	7.37893e-06
194	Pos	3-Mercapto-3-methyl-1-butanol	365.11	121.069	0.536784	0.0273045	0.038087	0.00476547
195	Pos	2-Methyl-1-butanethiol	488.147	105.074	0.534996	0.0105774	0.0201366	0.0058601
196	Pos	2'-Oxoaloesol 7-glucoside	155.869	395.131	0.534868	0.00994016	0.0157388	0.0001319
197	Pos	(Â±)-2-Pentanethiol	449.736	105.074	0.533669	0.01748	0.0324583	7.52614e-05
198	Pos	Dihydrouracil	64.9919	115.05	0.532832	0.0116109	0.0381993	2.01021e-06
199	Pos	Ebastine	122.897	470.297	0.528348	0.00107289	0.00255085	0.00144404
200	Pos	Serylisoleucine	471.247	219.134	0.526372	0.0152282	0.037487	1.53667e-06
201	Pos	2-Bromo-1H-indole-3-carboxaldehyde	314.12	223.972	0.52315	0.00905248	0.0289557	0.000324102
202	Pos	5-Hydroxy-3,3',7,8-tetramethoxy-4',5'-methylenedioxyflavone	300.307	403.112	0.522592	0.0137107	0.0319833	3.43757e-05
203	Pos	Safynol	210.806	201.087	0.517436	0.00624769	0.0209564	6.91155e-08
204	Pos	8,8'-Methylenebiscatechin	301.497	593.177	0.513219	0.000469855	0.00539995	2.69541e-06
205	Pos	Curcumin I	61.6262	397.164	0.511789	0.00106115	0.00564066	1.98437e-06
206	Pos	Cis-zeatin	187.389	220.118	0.51055	0.0343323	0.0768805	2.94409e-06
207	Pos	(1R)-Hydroxy-(2R)-glutathionyl-1,2-dihydronaphthalene	161.408	452.14	0.510153	0.00472698	0.0324549	2.83447e-05
208	Pos	L-Carnitine	359.848	162.112	0.509828	0.228144	0.441727	7.60266e-07
209	Pos	Glycine	372.172	76.0398	0.509204	0.0474221	0.114995	1.15627e-06
210	Pos	D-Galactose	150.211	163.06	0.508083	0.0293249	0.06681	8.0152e-06
211	Pos	1-Propenyl propyl sulfide	62.75	117.074	0.495685	0.0416661	0.0823231	1.02502e-05
212	Pos	3,5-Dichloro-4-hydroxy-2-methoxy-6-methylbenzoic acid	21.0645	250.988	0.494433	0.000938762	0.00371426	2.83379e-06
213	Pos	(3b,6b,8a,12a)-8,12-Epoxy-7(11)-eremophilene-6,8,12-trimethoxy-3-ol	91.161	327.216	0.487067	0.00699113	0.0119824	0.000337897
214	Pos	desmethylclomipramine	388.961	301.151	0.486554	0.00478695	0.0115954	8.17087e-07
215	Pos	cis-4-Hydroxy-D-proline	64.9989	132.066	0.486286	0.335611	0.489009	0.00269181
216	Pos	Histidinyl-Threonine	355.356	257.124	0.483027	0.0195637	0.0312024	0.00096968
217	Pos	(2R,3R,4R)-2-Amino-4-hydroxy-3-methylpentanoic acid	285.842	148.097	0.482342	0.395753	1.44284	8.51899e-08
218	Pos	Tricholomic acid	417.059	161.056	0.474968	0.00315803	0.0114885	2.92111e-09
219	Pos	5-Deoxykievitol	102.018	357.133	0.474621	0.00143364	0.0105158	1.32506e-08
220	Pos	Sedanonic acid	90.0149	211.133	0.472931	0.101406	0.445602	2.01647e-06
221	Pos	Cichoralexin	57.1434	249.144	0.470382	0.0385895	0.234191	8.88881e-08
222	Pos	2-Aminoheptanedioic acid	448.541	176.092	0.46518	0.0136879	0.0198816	0.00132043
223	Pos	6-(1-Hydroxyethyl)-2,2-dimethyl-2H-1-benzopyran	51.5308	205.118	0.461026	0.44949	1.01089	8.90423e-06
224	Pos	(all-E)-3,5,7-Tridecatriene-9,11-diyn-1-ol	68.4016	187.108	0.455276	0.030823	0.0921448	5.04791e-06
225	Pos	2-(Methylthio)propane	354.336	91.0586	0.454602	0.147465	0.208661	0.000445679
226	Pos	1,3,5-Bisabolatrien-10-one	494.933	219.17	0.451496	0.0556529	0.0749504	0.00379563
227	Pos	Threoninyl-Proline	339.649	217.118	0.44792	0.120805	0.218907	6.85884e-05
228	Pos	beta-Elemenone	507.469	219.17	0.446348	0.022966	0.0379589	0.00356687
229	Pos	Ciceritol	107.645	519.186	0.44284	0.00235636	0.00396428	4.58597e-06
230	Pos	2-Propenyl phenylacetate	275.794	177.095	0.439784	0.0121734	0.045575	1.62432e-07
231	Pos	Glycyl-Lysine	111.881	204.134	0.432613	0.27157	0.600987	5.77503e-06
232	Pos	4-(Glutamylamino) butanoate	429.342	233.113	0.429364	0.0269181	0.0422971	0.000168588
233	Pos	Piperochromanoic acid	99.5941	357.213	0.426	0.00784662	0.0148509	4.25012e-05
234	Pos	N2-Galacturonyl-L-lysine	201.975	323.145	0.424668	0.00249602	0.00627038	0.00511411
235	Pos	(3S,7E,9S)-9-Hydroxy-4,7-megastigmadien-3-one 9-glucoside	90.8243	371.206	0.423522	0.01822	0.0252439	0.00298496
236	Pos	gamma-Glutamylaspartic acid	480.241	263.087	0.415007	0.0125121	0.0271581	0.000792005
237	Pos	3-Methyl-3H-imidazo[4,5-f]quinoxalin-2-amine	244.48	200.092	0.411763	0.00662318	0.0117796	0.000612667
238	Pos	Isovalerylsarcosine	236.586	174.112	0.407713	0.00988339	0.0163975	0.00144633
239	Pos	5-Methyltetrahydrofolic acid	353.366	460.203	0.402867	0.000488133	0.0288682	6.62351e-06
240	Pos	N-Acetylglutamine	409.181	189.087	0.401123	0.0140566	0.0178798	0.000233763
241	Pos	Nequinate	322.993	366.177	0.396543	0.000752474	0.00480064	0.000138452
242	Pos	Norpropoxyphene	307.121	326.207	0.395981	0.0149852	0.0500358	1.26693e-08
243	Pos	Bakers yeast extract	111.822	275.112	0.395493	0.000558117	0.02674	1.13038e-05
244	Pos	gamma-L-Glutamyl-L-pipecolic acid	288.924	259.129	0.394584	0.00858178	0.0125275	0.00371997
245	Pos	DHAP(18:0)	115.161	437.275	0.392243	0.00219468	0.00830841	0.000132503
246	Pos	(all-E)-1,7-bis(4-hydroxyphenyl)-1,4,6-heptatrien-3-one	111.84	293.123	0.391456	0.000409735	0.0264122	3.52578e-09
247	Pos	Isotrichodermin	128.993	293.171	0.387355	0.00816463	0.014495	0.000356926
248	Pos	N-Methylschinifoline	203.018	256.133	0.386034	0.000195422	0.0198589	3.15473e-05
249	Pos	4',5,7-Trihydroxy-3'-prenylflavanone	69.5182	341.138	0.385675	0.00375531	0.00753495	2.34372e-05
250	Pos	Gravacridonetriol	428.35	358.134	0.384948	0.000258983	0.0105685	2.06541e-06
251	Pos	Isoswertiajaponin	301.361	463.134	0.379262	0.00779285	0.0190461	4.23576e-05
252	Pos	3,3'-Thiobispropanoic acid	178.635	179.04	0.378579	0.0135397	0.0224116	0.000436673
253	Pos	N-Acetylasparagine	415.887	175.071	0.376601	0.0509262	0.11333	1.68754e-06
254	Pos	Lysyl-Aspartate	149.447	262.14	0.375536	0.0484209	0.0849494	0.000597608
255	Pos	N-[[3-(b-D-Glucopyranosyloxy)-2,3-dihydro-2-oxo-1H-indol-3-yl]acetyl]aspartic acid	191.093	485.151	0.371323	0.000827212	0.00203907	0.0088267
256	Pos	4-Hydroxybenzyl isothiocyanate 4''-acetylrhamnoside	296.572	354.107	0.371077	0.00586458	0.012222	0.000648953
257	Pos	Euglobal Ia1	109.55	387.224	0.364442	0.00456467	0.0112821	0.000155987
258	Pos	1-Methoxyphaseollidin	62.6286	355.154	0.358062	0.00301109	0.0059503	0.000172587
259	Pos	Alitame	207.343	332.157	0.35777	0.00987839	0.015459	0.00302994
260	Pos	Kanzonol F	133.421	421.208	0.354251	0.00399356	0.012908	6.78277e-08
261	Pos	2-Butylbenzothiazole	369.921	192.087	0.353946	0.0114295	0.0172752	0.00223957
262	Pos	Norverapamil	90.0094	441.271	0.35367	0.00177286	0.00591476	0.000111728
263	Pos	1-Deoxy-D-xylulose	190.424	117.055	0.351376	0.00242019	0.00430018	0.00317879
264	Pos	L,L-Cyclo(leucylprolyl)	94.1909	233.128	0.341611	0.0375386	0.29542	9.23298e-09
265	Pos	Thiodiglycol	74.0824	123.048	0.340015	0.0120827	0.022919	8.72382e-05
266	Pos	(Â±)-2,2'-Iminobispropanoic acid	50.5445	162.076	0.333419	0.0343099	0.0613054	0.000160665
267	Pos	Oxymorphone	433.856	302.135	0.333068	0.0113333	0.0208267	0.000139293
268	Pos	Pyrraline	51.5557	255.134	0.33057	0.0161748	0.0430362	8.0992e-07
269	Pos	Nicotine imine	270.2	161.107	0.330249	0.0230234	0.0569407	2.02985e-06
270	Pos	2-Hydroxy-3-(3,4-dihydroxyphenyl)propanamide	427.13	198.076	0.330127	0.0161114	0.0623482	5.40453e-06
271	Pos	Luteolin 7-sulfate	43.7025	367.011	0.329913	0.001438	0.045237	0.000316544
272	Pos	N-Acetyl-b-glucosaminylamine	88.8625	221.113	0.327947	0.0969308	0.300605	4.19052e-06
273	Pos	Threoninyl-Isoleucine	481.892	233.15	0.327581	0.0055751	0.0272258	1.44099e-08
274	Pos	Encelin	428.268	245.113	0.326074	0.26529	0.511191	4.0409e-06
275	Pos	Tetrahydroharmol	193.369	203.118	0.322116	0.840064	1.04977	0.00253107
276	Pos	Kelampayoside A	156.941	479.187	0.321914	0.00202111	0.00279948	0.00207737
277	Pos	Miltirone	97.8907	283.176	0.319462	0.0269192	0.0747655	4.29101e-05
278	Pos	Nomilinic acid 17-glucoside	249.844	713.292	0.317275	0.000593939	0.003119	0.000245404
279	Pos	4-tert-Butylphenyl salicylate	165.697	271.14	0.315923	0.0173556	0.0373078	6.01075e-06
280	Pos	Alanyl-Proline	158.181	187.108	0.311781	0.037492	0.142136	9.77804e-07
281	Pos	2-Heptylbenzothiazole	94.5616	234.132	0.311576	0.01624	0.0321674	0.00281593
282	Pos	1,4-Dideoxy-1,4-imino-D-ribitol	522.289	134.081	0.309607	0.0286486	0.0433314	0.000134335
283	Pos	1-(9Z-hexadecenoyl)-glycero-3-phosphate	310.469	409.244	0.306526	0.000722553	0.0058523	4.31908e-10
284	Pos	Isoleucyl-Hydroxyproline	59.3855	245.149	0.305367	0.258496	0.383842	0.00186646
285	Pos	7,8-Dihydropteroic acid	68.3824	315.122	0.303635	0.00502744	0.00991429	8.41866e-05
286	Pos	Tromethamine	305.246	122.081	0.301137	0.00983579	0.0166187	0.000611722
287	Pos	5-Methylcytidine	251.343	258.108	0.99898	0.0134338	0.00225088	4.89568e-05
288	Pos	Cytarabine	249.848	244.093	0.998892	0.108272	0.00995221	0.00113957
289	Pos	Zapotin	397.992	365.105	0.998705	0.117243	0.0589401	0.000338688
290	Pos	Niacinamide	57.1309	123.055	0.997999	0.192447	0.0225184	0.000434978
291	Pos	L-Phenylalanine	270.201	166.086	0.997922	14.8263	10.3149	0.0038198
292	Pos	Thiamine	345.392	265.111	0.997063	0.757629	0.36584	0.00243676
293	Pos	Neotrehalose	385.595	365.105	0.99662	0.130091	0.0738706	2.83852e-06
294	Pos	L-N-(1H-Indol-3-ylacetyl)aspartic acid	286.951	291.105	0.996606	0.0557486	0.00988415	0.00300379
295	Pos	Adenosine	172.599	268.104	0.996583	1.28415	0.00266424	0.00083533
296	Pos	3-Methyladenine	246.725	150.077	0.995966	0.783871	0.260418	0.000573043
297	Pos	Protoanemonin	426.407	97.0288	0.994092	0.0550875	0.00650039	1.16909e-05
298	Pos	BL V	330.68	425.084	0.99399	0.00469916	0.00344745	0.0117146
299	Pos	Kaempferol 3-O-glucosyl-(1->2)-rhamnoside	271.058	595.165	0.993973	1.39756	0.336118	5.05552e-06
300	Pos	Adenosine 2'-phosphate	442.882	348.07	0.99382	0.00697446	0.000452153	0.000541041
301	Pos	Tryptamine	203.948	161.107	0.993732	2.32032	0.819693	0.00156192
302	Pos	Prostaglandin H2	64.9891	335.219	0.993584	0.0105636	0.00345727	0.0427874
303	Pos	2-Propylpiperidine	207.5	128.143	0.993461	2.42547	1.54297	4.0127e-05
304	Pos	Genistein	241.082	271.06	0.9916	0.00529085	0.00323941	0.00533254
305	Pos	Maltitol	392.325	367.121	0.991305	0.0452752	0.0104848	5.83105e-05
306	Pos	D-Glutamine	383.354	147.076	0.990091	10.8148	1.96647	0.000191746
307	Pos	Cosmosiin	153.571	433.113	0.989751	0.0056669	0.00110155	0.00246018
308	Pos	3-Buten-2-one	255.101	71.0496	0.989052	0.00532484	0.00017665	0.000108231
309	Pos	Erinapyrone A	271.945	143.073	0.988373	0.0323065	0.0021903	0.00123625
310	Pos	Kaempferol 3-alpha-L-arabinofuranoside	188.299	419.097	0.988087	0.0186145	0.00138967	0.001794
311	Pos	2'-O-Methyladenosine	89.6316	282.119	0.986409	0.0806722	0.00205504	0.00189158
312	Pos	Alanyl-Leucine	246.708	203.139	0.9862	1.15473	0.414197	0.00142934
313	Pos	6-Methylquinoline	203.963	144.081	0.985203	7.09144	2.74865	0.00172528
314	Pos	Oleamide	188.326	282.279	0.984816	0.154484	0.000116383	0.000719002
315	Pos	4-Hydroxy-2-butenoic acid gamma-lactone	303.748	85.0288	0.984287	0.124029	0.0160831	0.000777892
316	Pos	Mannitol	302.632	183.086	0.984079	1.78014	0.483122	0.000933156
317	Pos	Pyroglutamic acid	383.342	130.05	0.981898	4.85041	0.86898	0.000224116
318	Pos	Isoquercitrin	305.439	465.103	0.97607	0.00939593	0.00375292	0.025022
319	Pos	Oxfendazole	360.958	316.079	0.972507	0.0282037	0.00739792	0.000662259
320	Pos	(Â±)-Tryptophan	274.348	205.097	0.971106	4.11226	0.617369	0.0015315
321	Pos	Benzaldehyde	270.2	107.049	0.967739	0.0881389	0.0616974	0.0023476
322	Pos	1H-Indole-3-carboxaldehyde	271.313	146.06	0.967175	0.208282	0.0382256	0.019745
323	Pos	Methyl 3,4-dihydroxy-5-prenylbenzoate 3-glucoside	354.248	399.164	0.958249	0.00858064	0.00294123	0.0048116
324	Pos	Pyrophaeophorbide a	71.7248	535.268	0.958161	1.08633	0.00372943	2.7645e-05
325	Pos	3-(2-Furanyl)-2-propenal	135.916	123.044	0.956582	0.038297	0.0208873	0.00812278
326	Pos	L-Arginine	519.516	175.119	0.954237	0.409518	0.0879971	2.84782e-05
327	Pos	Cyanidin 3-(4-acetylglucoside)	174.459	491.118	0.950874	0.0324557	0.0026163	0.00300517
328	Pos	Perillyl aldehyde	30.8185	151.112	0.946582	0.166415	0.0242532	9.63094e-05
329	Pos	Fenpropimorph	189.422	304.263	0.943603	0.0292716	9.05107e-06	0.000608117
330	Pos	5-Methyl-2(3H)-furanone	257.429	99.0444	0.940634	0.257449	9.05107e-06	0.000213667
331	Pos	2-Methoxy-4-vinylphenol	220.611	151.075	0.940548	0.111933	0.0604957	0.00287204
332	Pos	Lactose 6-phosphate	285.219	423.09	0.940371	0.00197112	0.000893151	0.00259298
333	Pos	Leucyl-Tyrosine	226.006	295.165	0.938838	0.344251	0.140659	0.00709961
334	Pos	Glycyltyrosine	293.691	239.103	0.934895	0.0146844	0.00644308	0.00055088
335	Pos	Grevilline D	449.668	357.055	0.933375	0.00345357	0.000233232	0.000169868
336	Pos	Yuccaol C	111.582	543.128	0.930193	0.0162404	0.000630464	0.0109769
337	Pos	a-L-Arabinofuranosyl-(1->2)-[a-D-mannopyranosyl-(1->6)]-D-mannose	385.594	475.177	0.925328	0.0238715	0.0107251	0.00180095
338	Pos	L-Gulose	257.945	203.052	0.925223	0.192857	0.00590184	0.000190721
339	Pos	LysoPE(22:0/0:0)	211.851	538.387	0.924562	0.00174366	9.05107e-06	0.0001726
340	Pos	Suberylglycine	169.113	232.118	0.924203	0.441446	0.133064	0.0107537
341	Pos	Furocoumarinic acid glucoside	373.279	367.109	0.923817	0.0036916	0.000490019	3.1285e-06
342	Pos	2,4-Dimethylfuran	72.8173	97.0651	0.917216	0.00665903	0.00152918	0.0474699
343	Pos	Kojibiose	374.4	325.113	0.915152	0.0204098	0.00111582	0.000182272
344	Pos	Leucyl-Isoleucine	200.619	245.186	0.912596	1.58183	0.788284	0.00380767
345	Pos	Ecgonine methyl ester	238.215	200.128	0.910511	0.0315655	0.0138263	0.000530808
346	Pos	Phenylalanyl-Arginine	325.238	322.187	0.903473	0.0210542	0.0023048	3.59073e-05
347	Pos	Ethenyl acetate	303.753	87.0445	0.902622	0.0275206	0.00697397	0.000492223
348	Pos	Kyotorphin	360.956	338.182	0.89915	0.0202792	0.000683194	0.00486311
349	Pos	3-O-Caffeoyl-1-O-methylquinic acid	270.198	369.121	0.898934	0.0127713	0.00538723	0.0108904
350	Pos	2-Pyrrolidineacetic acid	289.297	130.097	0.898896	0.120929	0.0707532	0.000121503
351	Pos	Diosmetin 7-neohesperidoside	237.706	609.181	0.898828	0.00232167	0.000638098	0.000265841
352	Pos	2-Pentylfuran	30.2893	139.112	0.896756	0.0358461	0.0139974	8.74955e-06
353	Pos	Quinone	307.168	109.029	0.894804	0.0160333	9.05107e-06	2.10031e-05
354	Pos	4-Deacetylneosolaniol	340.773	341.159	0.893932	0.00526666	0.00308759	0.0140644
355	Pos	Indole	271.302	118.065	0.888957	0.390515	0.18741	0.000729896
356	Pos	Serotonin	122.174	177.102	0.883963	0.333845	0.117941	0.00461873
357	Pos	Glycerophosphocholine	393.468	258.11	0.882391	8.4614	0.583249	0.000152886
358	Pos	Anigorufone	128.928	273.094	0.88081	0.0209423	0.0101005	4.58667e-05
359	Pos	Tyramine glucuronide	248.655	314.121	0.878767	0.00744417	0.000414492	6.56727e-06
360	Pos	Isoleucyl-Phenylalanine	189.447	279.17	0.878231	1.80144	0.976157	0.0170245
361	Pos	Quercetin 3-(6''-malonyl-glucoside)	300.962	551.103	0.872626	0.0362646	0.00324501	0.00598016
362	Pos	(6E)-Piperamide-C7:1	191.756	302.171	0.871804	0.0118913	0.00627423	0.00333877
363	Pos	Queuosine	449.366	410.166	0.870881	0.0125307	0.00699527	0.01286
364	Pos	Phenylalanyl-Glycine	247.843	223.107	0.866305	0.24458	0.0561223	0.00548468
365	Pos	Dihydromorelloflavone	158.061	559.123	0.863593	0.474115	0.00616087	0.0137614
366	Pos	Glutaminylarginine	439.493	303.177	0.86247	0.019276	0.00535981	0.00147283
367	Pos	Alanyl-Arginine	422.062	246.156	0.862215	0.251524	0.0859338	0.00124251
368	Pos	1-(beta-D-Ribofuranosyl)-1,4-dihydronicotinamide	163.627	257.113	0.860873	0.0327577	0.00617384	0.000937907
369	Pos	Norfloxacin	387.776	320.134	0.860325	0.00282696	0.00156958	0.00148756
370	Pos	2'-Hydroxygenistein 7-(6''-malonylglucoside)	260.691	535.109	0.859273	0.021124	0.00197106	0.000140703
371	Pos	Glucopyranosylmoranoline	419.312	326.144	0.856581	2.88879	1.82462	0.0137815
372	Pos	Phenylalanyl-Serine	251.185	253.118	0.851109	0.107795	0.007545	0.00431873
373	Pos	Arginyl-Valine	365.483	274.187	0.849994	0.757392	0.235128	0.00101524
374	Pos	Arginyl-Methionine	353.688	306.159	0.848073	0.0364937	0.00172606	0.00205973
375	Pos	Melledonal C	183.77	481.168	0.846797	0.00527203	0.00246479	0.0110191
376	Pos	Piperitenone	93.4693	151.112	0.84204	0.0512053	0.0266263	7.50679e-05
377	Pos	Pelargonidin 3-rhamnoside	127.343	417.118	0.841173	0.000885171	8.39709e-05	2.1342e-06
378	Pos	Domoic acid	206.205	312.144	0.840711	0.0744963	0.0144221	5.5481e-05
379	Pos	N-Methylcalystegine B2	354.248	190.107	0.839991	0.253391	0.111128	0.000372824
380	Pos	1,2,10-Trihydroxydihydro-trans-linalyl oxide 7-O-beta-D-glucopyranoside	354.252	383.191	0.839269	0.0144695	0.00467241	0.00375458
381	Pos	Glycyl-Isoleucine	275.527	189.123	0.837722	1.34969	0.304562	0.00228911
382	Pos	4-Hydroxymandelonitrile	78.0476	150.055	0.835228	0.225195	0.0747413	0.00370204
383	Pos	Tyrosyl-Valine	219.873	281.142	0.83426	0.00371849	0.00142437	0.00277327
384	Pos	Dihydro-6-isopropyl-2,4-dimethyl-4H-1,3,5-dithiazine	80.6388	192.086	0.833682	0.214299	0.0113479	4.74537e-05
385	Pos	Norfuraneol	116.6	115.039	0.833191	0.0296981	0.000843509	0.000164291
386	Pos	Nicotinic acid mononucleotide	346.52	256.081	0.830795	0.287549	0.0876244	7.97352e-05
387	Pos	1,2-Dimethoxy-13-methyl-[1,3]benzodioxolo[5,6-c]phenanthridine	401.303	348.129	0.829853	0.0191673	0.0116934	0.0163328
388	Pos	5,6-Dihydro-11-methoxyyangonin	409.176	291.119	0.827281	0.421199	0.151568	0.000642811
389	Pos	2-(4-Methoxyphenoxy)propanoic acid	97.5532	197.081	0.825288	0.0243997	0.0137662	0.0258655
390	Pos	Isopetasoside	338.55	397.22	0.825149	0.0032743	0.000904994	0.00259832
391	Pos	Homofukinolide	466.652	431.239	0.822447	0.00221286	0.000467959	0.000752264
392	Pos	3-Dehydrosphinganine	107.993	300.289	0.816472	29.3276	0.174452	0.000374221
393	Pos	L-Glutamine	430.524	147.076	0.809752	0.118649	0.0280682	0.0136286
394	Pos	Malondialdehyde	254.489	73.0289	0.803258	0.00571352	9.05107e-06	0.00192588
395	Pos	Phytosphingosine	146.84	318.3	0.802258	13.0969	0.0428233	0.00127962
396	Pos	Spirolide F	138.345	728.51	0.79981	0.00679806	9.05107e-06	0.0295411
397	Pos	Alanyl-Valine	292.61	189.123	0.799174	0.0510064	0.0264555	0.00917665
398	Pos	PC(16:0/16:0)	163.637	734.568	0.794351	0.0196004	9.05107e-06	0.00045499
399	Pos	Leucyl-Serine	277.078	219.134	0.793921	1.00553	0.0791531	0.000764614
400	Pos	beta-D-Glucopyranosyl anthranilate	362.062	300.105	0.788002	0.0472446	0.0103298	8.47632e-05
401	Pos	Pyro-L-glutaminyl-L-glutamine	132.143	258.097	0.785433	0.00391079	0.00225536	0.000416414
402	Pos	N-Butyrylglycine	104.279	146.081	0.784858	0.136099	0.0930389	0.000360497
403	Pos	6-Chloro-N-(1-methylethyl)-1,3,5-triazine-2,4-diamine	273.532	188.07	0.784688	3.89394	0.5397	0.00151286
404	Pos	3-Methylglutarylcarnitine	232.14	290.16	0.781947	0.0989381	0.0509723	0.000255098
405	Pos	D-Tagatose	374.412	163.06	0.780591	0.0162915	0.0117146	0.00281409
406	Pos	Methylmalonic acid semialdehyde	122.1	103.039	0.778437	0.0678894	0.042335	0.0110305
407	Pos	5'-O-Desmethyl omeprazole	340.529	332.111	0.778158	0.00386942	0.00137824	0.00913815
408	Pos	Histidinal	188.299	140.082	0.770012	0.00703706	9.05107e-06	0.00210554
409	Pos	ETF	256.916	101.024	0.766682	0.10356	5.42699e-05	2.78277e-05
410	Pos	Leucyl-Threonine	250.08	233.149	0.766021	1.78123	0.294456	0.00409808
411	Pos	Octadecanamide	115.471	284.294	0.764393	3.28803	0.00679921	0.000557682
412	Pos	Quinceoxepine	29.7842	179.143	0.763024	0.283563	0.0177863	9.83057e-05
413	Pos	Armillaramide	96.436	556.53	0.758221	0.0371309	9.05107e-06	7.73025e-06
414	Pos	20-Hydroxyeicosatetraenoic acid	29.132	321.242	0.753364	2.42769	0.043411	0.00012608
415	Pos	3'-N'-Acetylfusarochromanone	441.831	335.156	0.752333	0.00912341	0.00554077	7.47056e-05
416	Pos	gamma-Glutamylleucine	370.361	261.144	0.741299	0.042413	0.0233303	0.0313023
417	Pos	Isopentenyladenine-9-N-glucoside	346.33	364.196	0.74036	0.00638687	0.00114352	0.000108971
418	Pos	N-[(4E,8E)-1,3-dihydroxyoctadeca-4,8-dien-2-yl]hexadecanamide	89.657	536.503	0.740302	0.00118366	9.05107e-06	0.00154048
419	Pos	Dihydroxyfumitremorgin C	429.425	412.182	0.737634	0.0143611	0.00798462	0.00753058
420	Pos	Junosidine	387.832	338.145	0.734682	0.0188998	0.0117431	5.78963e-05
421	Pos	2-Hydroxy-3-(4-methoxyphenyl)propanoic acid	169.256	197.081	0.734405	0.0415384	0.0175722	0.00401698
422	Pos	1-Naphthaleneacetic acid	251.184	187.071	0.732164	0.0564342	0.0239347	0.00575045
423	Pos	Allolithocholic acid	29.132	377.304	0.731432	0.731528	0.00585353	6.29654e-05
424	Pos	Osmaronin	539.361	260.113	0.729779	0.0730703	0.0306998	0.0074439
425	Pos	Corticosterone	388.972	347.229	0.729641	0.0252746	0.0137841	0.00578012
426	Pos	Quinaldine	272.406	144.081	0.72572	0.445009	0.213479	0.00206596
427	Pos	LysoPE(18:1(9Z)/0:0)	184.961	480.308	0.724443	0.0435424	9.05107e-06	0.000610477
428	Pos	Tyrosine methylester	43.7622	196.097	0.72125	0.108201	0.0649514	0.00207575
429	Pos	11-Dehydro-thromboxane B2	463.267	369.224	0.719215	0.008755	0.00567541	0.0289994
430	Pos	N-Acetylserine	168.117	148.06	0.71874	0.0379954	0.0197474	2.3062e-05
431	Pos	Dehydrophytosphingosine	140.826	316.284	0.71705	17.5926	0.755709	0.000708269
432	Pos	Ethyl trans-p-methoxycinnamate	30.2987	291.195	0.71249	0.2266	0.0248694	0.000507824
433	Pos	Geranyl phenylacetate	24.5647	273.185	0.711455	0.0234423	0.00163583	0.000240576
434	Pos	Sciadonic acid	30.2746	307.262	0.7005	0.581663	0.0436741	0.000440587
435	Pos	L-2,3-Dihydrodipicolinate	78.4537	170.045	0.700486	0.00496459	9.05107e-06	0.00164336
436	Pos	Isopulegone caffeate	168.123	317.182	0.69677	0.0400074	0.0112939	0.00181047
437	Pos	1,3,5-Trihydroxy-10-methylacridone	284.724	258.074	0.692358	0.016868	0.00523761	0.00998084
438	Pos	Lagerstroemine	64.1462	438.231	0.690401	0.0101384	0.00198494	0.000831407
439	Pos	Juglone glucoside	329.709	337.09	0.688981	0.0225151	0.00859098	0.000128353
440	Pos	Glucosylsphingosine	63.8744	462.343	0.687907	0.0296734	7.70882e-05	2.89584e-05
441	Pos	alpha-Hydroxy-N-desmethyltamoxifen	451.024	374.215	0.685218	0.00920543	0.00233613	0.00352003
442	Pos	Tryptophyl-Arginine	330.68	361.198	0.68372	0.00644755	0.00141988	0.00546854
443	Pos	Lucidenic acid M	219.756	463.302	0.68019	0.00143196	2.41252e-05	0.00352752
444	Pos	Theaspirone A	139.014	209.154	0.679963	0.154217	0.1079	0.00686202
445	Pos	4-O-alpha-D-Galactopyranosylcalystegine B2	427.144	338.145	0.679483	0.106498	0.0242167	0.00300226
446	Pos	Artemoin A	60.5107	551.503	0.678131	0.00313364	9.05107e-06	6.74118e-05
447	Pos	Glyceryl lactooleate	226.892	429.318	0.677845	0.0143909	0.000697191	7.34223e-05
448	Pos	1,4-Di-O-caffeoylquinic acid	189.506	517.133	0.676493	0.00495522	0.00265024	0.000153887
449	Pos	2-Hydroxyestrone	143.118	287.163	0.672605	0.0112799	0.00440775	0.0134266
450	Pos	N-Benzoylaspartic acid	94.5173	238.071	0.671209	0.035806	0.00971659	0.000163189
451	Pos	Histidinyl-Leucine	308.043	269.161	0.670947	0.352135	0.17102	3.04426e-06
452	Pos	Aegle marmelos Alkaloid C	53.93	366.209	0.669522	0.114608	0.00815044	0.00030772
453	Pos	LysoPC(P-16:0)	171.488	480.353	0.668729	0.037449	9.05107e-06	0.00324303
454	Pos	Perilloside C	426.026	317.193	0.66556	0.0310906	0.0084486	0.00186285
455	Pos	3',4',5'-Trimethoxytricetin 7-[rhamnosyl-(1->6)-glucoside]	236.614	653.207	0.664643	0.00315208	0.000586218	0.000949733
456	Pos	Mangiferic acid	79.6121	281.247	0.664144	0.0336189	0.00317976	0.000162086
457	Pos	Methyl 2-furoate	310.467	127.039	0.662485	0.0517812	0.00152432	1.48669e-09
458	Pos	Arachidonic acid	30.2401	305.247	0.656374	0.533058	0.0354389	0.000161028
459	Pos	Prulaurasin	341.908	318.095	0.653552	0.0119054	0.000935511	0.00432933
460	Pos	(3beta,5alpha,6beta,22E,24R)-23-Methylergosta-7,22-diene-3,5,6-triol	32.8483	445.368	0.646795	0.0108564	0.000121302	0.00045479
461	Pos	Linoleamide	140.984	280.263	0.644981	0.254981	0.00510418	0.000654646
462	Pos	Scutigeral	256.784	373.245	0.639414	0.0413989	0.00332076	0.0154345
463	Pos	Fumitremorgin C	462.409	380.203	0.638313	0.00922027	0.00270342	0.00338962
464	Pos	Ramiprilat	420.359	389.214	0.638141	0.00674409	0.0023879	0.00122271
465	Pos	Cyanidin 3-glucoside	224.289	449.107	0.637949	0.825734	0.0683	0.00151253
466	Pos	Gravacridonediol	394.113	342.139	0.637518	0.309213	0.101049	0.000645812
467	Pos	Pipernonaline	77.6224	364.187	0.63569	0.00738945	0.00221777	0.0034097
468	Pos	Mangiferdesmethylursanone	29.2231	429.372	0.632055	0.0131191	0.000112563	7.12555e-06
469	Pos	Dihydrofukinolide	344.158	393.224	0.629346	0.00412199	0.00159163	0.00254389
470	Pos	Fast green FCF	253.423	765.165	0.629286	0.0079796	0.000860513	6.64662e-05
471	Pos	(3S,5R,6R,6'S)-6,7-Didehydro-5,6-dihydro-3,5,6'-trihydroxy-13,14,20-trinor-3'-oxo-beta,epsilon-caroten-19',11'-olide 3-acetate	254.655	629.333	0.627844	0.00332054	3.57959e-05	0.00127934
472	Pos	6,15-Diketo,13,14-dihydro-PGF1a	22.3871	369.227	0.627325	0.00870358	9.05107e-06	0.00840973
473	Pos	2-Hydroxy-6-(8-tridecenyl)benzoic acid	29.6839	319.226	0.626144	0.25173	0.00555179	0.000951002
474	Pos	PA(8:0/8:0)	326.174	425.228	0.623534	0.00230576	0.000225848	5.77755e-07
475	Pos	Dextrorphan O-glucuronide	423.727	434.225	0.617887	0.0041094	0.00055515	1.68861e-08
476	Pos	Tetraphyllin B	397.952	288.108	0.614112	0.194648	0.133759	0.0148335
477	Pos	N-(2R-Hydroxydocosanoyl)-2S-amino-1,3S,4R-octadecanetriol	120.186	656.609	0.612479	0.00170029	9.05107e-06	0.0220637
478	Pos	Aureol	221.423	285.039	0.610948	0.000866297	0.000117401	0.000961959
479	Pos	Montecristin	215.745	575.503	0.609929	0.0110101	9.05107e-06	0.00088766
480	Pos	3-Hydroxyadipic acid 3,6-lactone	257.43	145.049	0.609285	1.78531	0.0104089	0.000140409
481	Pos	2-acetyl-1-alkyl-sn-glycero-3-phosphocholine	210.712	524.37	0.606745	0.00191942	9.05107e-06	0.000493267
482	Pos	O-propanoyl-carnitine	237.695	218.139	0.606193	0.0566163	0.0298699	0.000111542
483	Pos	Capsiamide	146.632	270.279	0.605683	0.00818285	9.05107e-06	0.00348121
484	Pos	4,5-Dihydropiperlonguminine	412.566	276.167	0.598191	0.0476831	0.0258407	0.00584795
485	Pos	N-Oleoylethanolamine	184.94	326.305	0.59343	0.00446224	9.05107e-06	0.000431012
486	Pos	PC(20:1(11Z)/14:0)	160.298	760.584	0.583474	0.00816706	9.05107e-06	0.00232656
487	Pos	PC(15:0/15:0)	165.87	706.537	0.581572	0.00196053	9.05107e-06	9.35827e-05
488	Pos	5-Methyldeoxycytidine	173.711	242.113	0.578728	0.0163772	0.00100505	1.43639e-09
489	Pos	Dihydro-2,4-dimethyl-6-(1-methylpropyl)-4H-1,3,5-dithiazine	273.526	206.1	0.57723	0.444945	0.128212	0.00288393
490	Pos	20-Hydroxy-leukotriene E4	132.293	456.241	0.571545	0.0175129	0.000984588	0.002143
491	Pos	PC(18:3(6Z,9Z,12Z)/18:1(11Z))	159.183	782.569	0.570034	0.00538164	9.05107e-06	0.00310692
492	Pos	N5-Acetyl-N2-gamma-L-glutamyl-L-ornithine	335.087	304.15	0.568517	0.00432929	0.00261988	0.00125505
493	Pos	6,10,14-Trimethyl-5,9,13-pentadecatrien-2-one	32.5704	263.237	0.56789	0.347176	0.0135598	2.93465e-05
494	Pos	PC(20:3(5Z,8Z,11Z)/16:0)	158.077	784.583	0.567279	0.00201655	2.67056e-05	0.00239541
495	Pos	PC(20:2(11Z,14Z)/14:0)	131.131	758.568	0.56637	0.00708245	9.05107e-06	0.00308774
496	Pos	Oxonantenine	394.57	336.087	0.565609	0.00493367	0.000329328	7.01859e-06
497	Pos	Tetrahydrocortisone	75.1101	365.232	0.56546	0.00809982	0.00327167	0.0312273
498	Pos	Dimethylstrobochrysin	180.45	297.116	0.56494	0.00169058	0.00028349	2.98478e-06
499	Pos	4-(Methylnitrosamino)-1-(3-pyridyl)-1-butanol glucuronide	369.732	386.165	0.561716	0.00475231	0.000888242	0.00616737
500	Pos	Tyrosyl-Alanine	267.786	253.118	0.559168	0.0686587	0.00495462	0.0200935
501	Pos	Galactosylsphingosine	121.354	462.342	0.555226	0.022759	0.000236214	0.000176167
502	Pos	Eicosapentaenoic acid	30.2475	303.232	0.554194	0.101287	0.00905758	0.00140415
503	Pos	1,4'-Bipiperidine-1'-carboxylic acid	192.829	213.16	0.552801	0.0163124	0.0108469	0.023823
504	Pos	Asparaginyl-Methionine	182.797	264.108	0.552782	0.00763141	0.00233512	0.000219849
505	Pos	N'-Hydroxyneosaxitoxin	289.202	332.134	0.550143	0.0917082	0.028926	0.00431324
506	Pos	Osmundalactone	392.326	129.055	0.548558	0.0170321	0.00669091	0.00048882
507	Pos	Avocadenofuran	27.3674	249.221	0.5475	0.101896	0.00189474	1.62939e-05
508	Pos	N-Acetyldopamine	285.829	196.097	0.546084	0.0543502	0.0395039	0.000374498
509	Pos	Tetrahydropentoxyline	311.565	367.15	0.543286	0.00562336	0.000216024	0.00272907
510	Pos	PC(18:3(9Z,12Z,15Z)/14:0)	76.2506	728.531	0.540273	0.000873367	9.05107e-06	0.028748
511	Pos	4-(2-Furanylmethylene)-3,4-dihydro-2H-pyrrole	270.198	148.076	0.538606	0.0228861	0.014475	0.0169962
512	Pos	Gentiotriose	462.73	505.177	0.535826	0.00157673	0.000429752	0.00582816
513	Pos	4-Pyridoxic acid	143.275	184.064	0.532844	1.6468	1.19401	0.0211718
514	Pos	LysoPC(18:2(9Z,12Z))	78.6977	520.327	0.52929	0.00148043	0.000127696	0.00075926
515	Pos	Mangiferin 6'-gallate	177.1	575.118	0.523566	0.0533208	0.0147039	0.00209474
516	Pos	ent-1(10)-Halimene-15,19-dioic acid	62.7527	337.235	0.521994	0.0125515	0.00312148	6.04502e-08
517	Pos	Celastrol	33.09	451.291	0.517861	0.00234096	3.73435e-05	0.000634636
518	Pos	(2beta,3alpha,9alpha,24R)-Ergosta-7,22-diene-2,3,9-triol	29.5675	431.351	0.516432	0.10757	0.000648058	0.0198548
519	Pos	Threoninyl-Leucine	262.141	233.15	0.516326	0.104394	0.0212	3.5849e-08
520	Pos	Panaquinquecol 1	32.6028	293.21	0.516011	1.39323	0.311182	0.000591482
521	Pos	Dihydromarasmone	435.057	281.142	0.514655	0.00803343	0.00572901	0.010879
522	Pos	Ethyl 2Z,4E-decadienoic acid	29.2698	197.153	0.512248	0.0480735	0.00175176	0.000227363
523	Pos	19(20)-EpDPE	355.515	345.25	0.51033	0.0249522	0.0145828	0.0214993
524	Pos	6''-O-Malonyldaidzin	224.272	503.116	0.509986	0.00191463	0.000539791	7.2525e-06
525	Pos	Egonol glucoside	99.4684	489.175	0.50765	0.00130773	0.00084599	0.00774812
526	Pos	5'-Deoxy-5'-(methylsulfinyl)adenosine	231.77	314.092	0.50763	0.00440587	3.2471e-05	0.0218293
527	Pos	Tryptophyl-Phenylalanine	191.659	352.166	0.505967	0.0447166	0.00981988	0.0117874
528	Pos	Rosmaricine	455.33	346.208	0.504979	0.0124453	0.00886044	0.0107935
529	Pos	Fragransin C1	25.9737	375.183	0.50095	0.00370858	0.00117989	0.00211883
530	Pos	2-Ethylfuran	32.4778	97.0651	0.499133	0.0239858	0.0107385	0.000529854
531	Pos	2',4,4'-Trihydroxy-6'-methoxy-3',5'-diprenylchalcone	490.512	423.209	0.498911	0.00158119	3.12183e-05	1.91477e-05
532	Pos	Estriol	30.2957	289.179	0.498749	0.0170927	0.00224484	0.00512774
533	Pos	Methylgingerol	62.5839	309.206	0.498525	0.0330105	0.00159216	0.000912069
534	Pos	PC(22:1(13Z)/14:1(9Z))	158.075	786.6	0.495345	0.00357636	9.05107e-06	0.000460061
535	Pos	beta-Alanyl-L-lysine	440.65	218.15	0.493762	0.215121	0.0946305	0.00160018
536	Pos	Glycerol trihexanoate	326.025	387.272	0.493079	0.00985133	0.00119411	6.52432e-05
537	Pos	Dimethyl 2-galloylgalactarate	307.115	391.085	0.491127	0.0294104	0.000316701	0.00052052
538	Pos	15-Deoxy-d-12,14-PGJ2	388.967	317.218	0.489706	0.0271716	0.0132067	0.00282583
539	Pos	Myricanone	28.0007	357.173	0.488507	0.0109761	0.00560233	0.0123815
540	Pos	myo-Inositol	306.94	203.053	0.483087	0.0314394	0.0123058	0.000796206
541	Pos	Gibberellin A43	447.952	395.166	0.481505	0.00205414	0.00119351	0.03496
542	Pos	cis-Acetylacrylate	256.378	115.039	0.480867	0.200826	9.05107e-06	0.000337672
543	Pos	Niazirinin	184.94	322.128	0.47965	0.00105581	6.09142e-05	8.12005e-06
544	Pos	Threoninyl-Phenylalanine	239.346	267.134	0.47882	0.0285102	0.0113452	0.00217021
545	Pos	2,6-diaminohexanoic acid	30.2957	147.117	0.478138	0.0971983	0.0269748	1.4743e-08
546	Pos	(7R*,8R*)-3-Methoxy-3',4,7,9,9'-pentahydroxy-8,4'-oxyneolignan 4-xyloside	376.685	497.198	0.477978	0.00886983	0.00604294	0.00196192
547	Pos	3,4-Dihydro-2H-1-benzopyran-2-one	270.184	149.06	0.477433	0.0786429	0.0504744	0.00110681
548	Pos	Prostaglandin B1	30.2893	337.237	0.462736	0.389341	0.00664509	0.000500473
549	Pos	5-O-Desmethyldonepezil	37.7413	366.209	0.461769	0.0253622	0.00442997	1.21689e-07
550	Pos	Ptelatoside A	85.4083	415.158	0.460657	0.00824561	9.05107e-06	0.0015939
551	Pos	Simulansamide	428.219	398.166	0.45911	0.00481027	0.00303411	0.00604365
552	Pos	Melibiose	374.408	360.15	0.458686	0.180608	0.0311881	2.03341e-05
553	Pos	1-O-E-Cinnamoyl-(6-arabinosylglucose)	253.809	443.16	0.456845	0.00718856	0.00132524	0.000638506
554	Pos	Ergothioneine	403.56	230.102	0.456134	0.0476528	0.0348891	0.000865109
555	Pos	N-Carbamoyl-2-amino-2-(4-hydroxyphenyl)acetic acid	409.174	211.071	0.453064	0.0272235	0.0143478	0.00610694
556	Pos	Isoniazid alpha-ketoglutaric acid	248.948	266.074	0.451729	0.00771866	0.000912514	0.00145065
557	Pos	Mahanimbinine	233.224	350.219	0.450156	0.0214653	0.00383975	0.00204823
558	Pos	6-O-Acetylaustroinulin	35.0406	365.268	0.448272	0.00776854	0.000660428	0.00127735
559	Pos	Glucosyl (2E,6E,10x)-10,11-dihydroxy-2,6-farnesadienoate	217.513	433.248	0.447919	0.00158578	0.000514843	0.00394992
560	Pos	Acetoacetic acid	77.3088	103.039	0.447038	0.0134308	0.00271874	0.00141169
561	Pos	Erinacine C	71.7603	435.27	0.446408	0.00568884	9.05107e-06	0.00079557
562	Pos	N-[[3-Hydroxy-2-(2-pentenyl)cyclopentyl]acetyl]isoleucine	95.2306	326.232	0.444286	0.00930321	0.00424468	6.09064e-05
563	Pos	Trimethyl-2-propenylpyrazine	171.487	163.123	0.436204	0.0136011	0.00827592	0.00920347
564	Pos	PE(22:4(7Z,10Z,13Z,16Z)/14:1(9Z))	53.6897	738.505	0.43602	0.00280858	9.05107e-06	0.00104561
565	Pos	Tsangane L 3-glucoside	376.65	375.235	0.433448	0.0622982	0.010605	0.00198324
566	Pos	Dexamethasone	253.427	393.213	0.430956	0.0304156	0.00608485	0.00231389
567	Pos	Isoeugenol phenylacetate	344.166	283.14	0.429562	0.00745796	0.0032807	0.000745407
568	Pos	L-Galactose	258.527	198.097	0.427676	1.02792	0.00531945	0.000568974
569	Pos	2-(4-Allyl-2,6-dimethoxyphenoxy)-1-(3,4,5-trimethoxyphenyl)-1-propanol	23.5012	419.209	0.425799	0.00246936	0.000581078	0.00139241
570	Pos	Aspartyl-Isoleucine	391.205	247.129	0.424516	0.162057	0.0545673	0.00245741
571	Pos	Isoleucyl-Gamma-glutamate	300.396	260.16	0.421819	0.456603	0.107092	0.00253206
572	Pos	5',5''',8,8''-Tetrahydroxy-3',3''',4',4''',7',7''-hexamethoxy-5,5''-biflavan	249.967	663.251	0.421456	0.00198543	9.05107e-06	0.0022022
573	Pos	Distichonic acid A	409.193	295.113	0.420975	0.290519	0.144928	0.00711938
574	Pos	(4E,9a)-9-(3-Methyl-2E-pentenoyloxy)-4,10(14)-oplopadien-3-one	375.534	331.234	0.420136	0.0567897	0.00799072	0.0153118
575	Pos	Aminoadipic acid	181.62	162.076	0.419034	0.0717602	0.0544098	0.000225142
576	Pos	Agrocybin	218.642	148.043	0.416545	0.0665733	9.05107e-06	0.00943637
577	Pos	Prunin 6''-O-gallate	267.79	587.13	0.413397	0.00243377	9.05107e-06	0.0271426
578	Pos	Tetramethylsilane	53.7251	301.147	0.412863	0.0193867	0.00326087	0.00187434
579	Pos	5-Nonadecyl-1,3-benzenediol	238.698	415.302	0.407437	0.0321663	0.0024654	0.0035023
580	Pos	7-Aminomethyl-7-carbaguanine	116.65	180.086	0.40677	0.362358	0.0391349	1.50073e-05
581	Pos	Marminal	410.267	273.108	0.401611	0.124758	0.0198953	4.27957e-06
582	Pos	Avenalumin III	445.213	292.102	0.401364	0.00500664	0.00117359	0.00204704
583	Pos	C.I. Food Red 6	199.496	451.066	0.398769	0.0381151	0.000375732	0.00189526
584	Pos	Cibaric acid	94.6156	325.201	0.398187	0.0120872	0.00236369	0.0115136
585	Pos	1-(2,6-Dihydroxy-4-methoxyphenyl)-3-phenyl-1-propanone	447.473	273.108	0.394431	0.019567	0.00767853	0.00189102
586	Pos	Graveoline	394.56	280.092	0.392734	0.118662	0.01501	3.90533e-10
587	Pos	2-Methylglutaric acid	302.634	147.065	0.391417	0.287637	0.0767325	0.00106563
588	Pos	Flazine methyl ether	440.591	323.109	0.389761	0.00452911	0.00018515	0.0125117
589	Pos	Linalyl phenylacetate	72.8907	273.185	0.388346	0.0190073	0.00171745	0.0134051
590	Pos	3-(3,4,5-Trimethoxyphenyl)propanoic acid	146.844	258.134	0.37744	0.00536438	0.00345147	0.00666282
591	Pos	N-Succinyl-L,L-2,6-diaminopimelate	494.216	291.118	0.375813	0.0144946	0.00333756	0.0136314
592	Pos	Abscisic acid	368.804	265.139	0.370029	0.091237	0.0262607	0.000248792
593	Pos	4-Methoxybenzenepropanol 1-(2-sulfoglucoside)	187.173	409.119	0.368658	0.0231393	0.000652979	0.00223271
594	Pos	Methyl 2,3-dihydro-3,5-dihydroxy-2-oxo-3-indoleacetic acid	371.046	238.071	0.368177	0.0429251	0.0314301	0.0241319
595	Pos	S-Acetyldihydrolipoamide-E	447.711	250.092	0.367621	0.0189742	0.00977321	0.0177866
596	Pos	Citalopram aldehyde	178.906	296.113	0.367208	0.0142622	0.00123276	3.21961e-05
597	Pos	2-Oxovaleric acid	301.908	117.055	0.364082	0.0174948	0.00609225	0.0144614
598	Pos	Sphinganine	115.469	302.305	0.361613	20.9963	0.053895	0.000552676
599	Pos	N1-(2,4-Dimethoxybenzyl)-n2-(2-(pyridin-2-yl) ethyl)oxalamide	86.5434	344.17	0.3588	0.0819814	0.0150905	1.17581e-06
600	Pos	Norbuprenorphine	399.015	414.271	0.35775	0.0043105	0.00177577	0.00535143
601	Pos	alpha-Rhamnorobin	192.794	433.112	0.354283	0.139233	0.0209597	0.000426943
602	Pos	AS 1-5	62.7403	716.566	0.354156	0.00840529	9.05107e-06	0.00320046
603	Pos	Methionyl-Tryptophan	208.46	336.137	0.353322	0.0139189	0.000533019	0.0112148
604	Pos	Culinariside	122.193	802.638	0.350731	0.00475917	9.05107e-06	0.000102098
605	Pos	Saxitoxin	231.023	300.144	0.350314	0.181307	0.0377411	1.05951e-06
606	Pos	Dehydrovomifoliol	47.226	223.133	0.349525	0.0143096	0.00415326	0.0111282
607	Pos	Armillaric acid	23.5012	417.194	0.34441	0.00320758	4.64159e-05	0.000519257
608	Pos	Juzirine	397.943	282.118	0.342153	0.0372812	0.0149128	7.77279e-05
609	Pos	Cadabicine methyl ether	151.447	450.244	0.340544	0.00184081	4.54562e-05	3.17725e-05
610	Pos	L-erythro-5-(1-Hydroxyethyl)-2(5H)-furanone	302.632	129.055	0.338244	0.315979	0.0849009	0.00108523
611	Pos	PC(24:1(15Z)/14:0)	119.778	816.654	0.337519	0.046764	9.05107e-06	4.77616e-05
612	Pos	Palmitic acid	122.193	274.274	0.336682	0.159843	0.00286544	0.000661181
613	Pos	N-Acetyl-a-neuraminic acid	428.238	310.113	0.33438	0.0509745	9.05107e-06	0.00273637
614	Pos	z-Clausenamide	218.642	280.139	0.331659	0.0363783	0.0173736	0.000167463
615	Pos	5C-aglycone	505.146	273.108	0.330841	0.00962981	0.00261601	0.00135542
616	Pos	L-Coprine	336.275	203.103	0.329993	0.0154386	0.010142	0.000147233
617	Pos	Fructosamine	90.0094	180.086	0.327177	1.5991	0.123361	8.29832e-06
618	Pos	Palmitoleoyl Ethanolamide	141.12	298.274	0.32555	0.602879	0.0145277	0.000812943
619	Pos	Plantaricin BN	132.292	485.249	0.323056	0.00498971	6.78364e-05	6.16501e-06
620	Pos	9,10-epoxyoctadecanoic acid	79.7902	299.258	0.323026	0.130589	0.0116016	0.000299094
621	Pos	Ganoderic acid theta	249.382	531.292	0.320079	0.00550187	0.00318448	0.0304077
622	Pos	Ketosantalic acid	583.776	251.16	0.31999	0.00973177	0.000819892	0.000128068
623	Pos	Murrayamine A	374.408	280.139	0.319836	0.0735292	0.0242726	0.0202368
624	Pos	1,7-Dimethylguanosine	414.799	312.129	0.319247	0.0155096	0.00762186	0.0102119
625	Pos	7-Hydroxyheptaphylline	161.392	296.134	0.318173	0.0186836	0.00204037	0.000925201
626	Pos	Resolvin D2	106.209	359.229	0.318118	0.0324469	0.0162773	0.00911925
627	Pos	Piceatannol 4'-galloylglucoside	425.978	559.136	0.315635	0.0038958	0.000742884	0.0146009
628	Pos	5-De-O-methyltoddanol	409.193	277.103	0.312868	0.0748618	0.0430145	0.0130401
629	Pos	(R)-Higenamine	293.507	272.134	0.312188	0.0104011	9.05107e-06	0.000302127
630	Pos	2-Phenylethyl benzoate	395.709	227.103	0.309011	0.0232142	0.0137653	0.0136687
631	Pos	CPA(18:0/0:0)	226.09	421.281	0.306724	0.00411795	0.000724896	4.17876e-07
632	Pos	Melleolide H	342.479	431.214	0.303675	0.00255884	0.000102359	1.84517e-05
633	Neg	Rhamnose	180.114	163.06	0.826663	48.8585	24.1142	0.00241178
634	Neg	Sclareol	45.2977	307.264	0.772993	0.892578	0.000247718	0.0455909
635	Neg	3-Methoxyanthranilate	211.696	166.05	0.76021	0.0769819	0.0048045	0.0311943
636	Neg	Tricosanoic acid	42.3854	353.343	0.572266	0.128233	0.000247718	0.0308495
637	Neg	2-benzoylbenzene-1,3,5-triol	196.034	229.048	0.328219	3.68049	0.206918	0.00449691
638	Neg	Pyrocatechol	39.6268	109.028	0.999414	15.6276	55.2439	0.0115627
639	Neg	Licochalcone A	141.971	337.151	0.654317	0.00263481	0.371245	0.000599955
640	Neg	Liquiritin apioside	501.691	531.157	0.612343	0.000778107	0.0160417	0.000660052
641	Neg	Ascorbic acid	454.176	175.024	0.509534	0.0683277	1.36751	0.0178412
642	Neg	Deoxyuridine	430.668	263.041	0.449758	0.0542261	0.0859664	0.0151785
Mass error: the scoring of the secondary match and takes the value [0, 1], closer to 1 means higher accuracy.

## Sheet: A vs P
Number	Analysis mode	Compound name	RT(min)	m/z	Mass error	Relative content		P-value
						A	P
1	Pos	5-Methylcytidine	251.343	258.108	0.99898	0.00225088	0.003321	0.00139736
2	Pos	Cytarabine	249.848	244.093	0.998892	0.00995221	0.0139629	0.00142238
3	Pos	2-Hydroxypyridine	48.1676	96.0447	0.998863	0.103741	0.145199	0.000176292
4	Pos	Zapotin	397.992	365.105	0.998705	0.0589401	0.131753	0.000266321
5	Pos	Niacinamide	57.1309	123.055	0.997999	0.0225184	0.0607417	1.37534e-07
6	Pos	Neotrehalose	385.595	365.105	0.99662	0.0738706	0.162323	1.23444e-05
7	Pos	Adenosine	172.599	268.104	0.996583	0.00266424	0.0315798	8.71008e-06
8	Pos	Protoanemonin	426.407	97.0288	0.994092	0.00650039	0.0194276	0.00295537
9	Pos	Maltitol	392.325	367.121	0.991305	0.0104848	0.160038	4.5375e-05
10	Pos	3-Buten-2-one	255.101	71.0496	0.989052	0.00017665	0.00108883	8.97951e-05
11	Pos	2'-O-Methyladenosine	89.6316	282.119	0.986409	0.00205504	0.00295549	5.25708e-06
12	Pos	4-Hydroxy-2-butenoic acid gamma-lactone	303.748	85.0288	0.984287	0.0160831	0.0411582	3.78329e-07
13	Pos	2-Methylbutylamine	207.343	88.1125	0.975216	0.0226859	0.157455	1.04512e-09
14	Pos	Harmalan	101.495	185.107	0.971172	0.152002	0.182622	0.00550398
15	Pos	L-Arginine	519.516	175.119	0.954237	0.0879971	0.216743	0.024791
16	Pos	5-(3-Pyridyl)-2-hydroxytetrahydrofuran	89.9363	166.086	0.944084	0.0178661	0.0328877	0.000274372
17	Pos	Harmalol	185.946	201.102	0.942456	0.0190692	0.0262931	0.000225752
18	Pos	5-Methyl-2(3H)-furanone	257.429	99.0444	0.940634	9.05107e-06	0.056019	0.000311332
19	Pos	Lactose 6-phosphate	285.219	423.09	0.940371	0.000893151	0.00868491	3.89553e-07
20	Pos	Pyridoxamine	250.254	169.097	0.935425	0.0495655	0.102728	2.12188e-06
21	Pos	Aflatoxin P1	97.5515	299.055	0.930684	0.0234661	0.0403297	1.11671e-05
22	Pos	a-L-Arabinofuranosyl-(1->2)-[a-D-mannopyranosyl-(1->6)]-D-mannose	385.594	475.177	0.925328	0.0107251	0.0141326	0.000406691
23	Pos	L-Gulose	257.945	203.052	0.925223	0.00590184	0.330145	0.000331885
24	Pos	Furocoumarinic acid glucoside	373.279	367.109	0.923817	0.000490019	0.00910906	0.00109801
25	Pos	Kojibiose	374.4	325.113	0.915152	0.00111582	0.187637	8.76688e-06
26	Pos	Calystegine B2	305.533	176.092	0.905161	0.471409	0.542233	0.00230545
27	Pos	Dimethyl fumarate	115.799	145.049	0.895056	0.0641234	0.504941	1.42847e-09
28	Pos	Quinone	307.168	109.029	0.894804	9.05107e-06	0.00667091	4.92564e-05
29	Pos	2-Furanmethanol	372.744	99.05	0.883525	0.0129454	0.0942065	2.45916e-06
30	Pos	Allysine	311.343	146.081	0.854125	0.128462	0.23879	0.000711612
31	Pos	4'-Hydroxyflurbiprofen	211.847	261.094	0.852784	0.00427179	0.428215	3.11639e-05
32	Pos	Norfuraneol	116.6	115.039	0.833191	0.000843509	0.0607289	6.94012e-05
33	Pos	Malondialdehyde	254.489	73.0289	0.803258	9.05107e-06	0.000812549	0.000212604
34	Pos	Rutacultin	436.168	275.135	0.78204	0.0318363	0.0420015	9.33408e-05
35	Pos	D-Tagatose	374.412	163.06	0.780591	0.0117146	0.105813	9.07203e-06
36	Pos	ETF	256.916	101.024	0.766682	5.42699e-05	0.0223723	3.93139e-05
37	Pos	1-Naphthaleneacetic acid	251.184	187.071	0.732164	0.0239347	0.0546958	4.67117e-05
38	Pos	1-Hydroxy-3,6,7-trimethoxy-2-(3-methyl-2-butenyl)-8-(3-hydroxy-3-methyl-1E-butenyl)-xanthone	104.637	455.204	0.726352	0.000657917	0.00145248	0.00132089
39	Pos	Quinaldine	272.406	144.081	0.72572	0.213479	0.25551	0.00373837
40	Pos	1,2,3,4-Tetrahydro-beta-carboline	140.292	173.107	0.724449	0.0147711	0.0208278	0.0019142
41	Pos	2-Hydroxyestrone	143.118	287.163	0.672605	0.00440775	0.0218023	0.000191156
42	Pos	Histidinyl-Leucine	308.043	269.161	0.670947	0.17102	0.232798	0.000230417
43	Pos	Tryptophyl-Valine	496.257	304.161	0.640974	0.00390003	0.0100214	9.80703e-07
44	Pos	Scutigeral	256.784	373.245	0.639414	0.00332076	0.0105602	5.87595e-05
45	Pos	Dextrorphan O-glucuronide	423.727	434.225	0.617887	0.00055515	0.00359122	3.79581e-06
46	Pos	3-Hydroxyadipic acid 3,6-lactone	257.43	145.049	0.609285	0.0104089	0.463682	3.20067e-07
47	Pos	Methionyl-Proline	259.065	247.111	0.579634	0.00191323	0.0119203	1.54501e-05
48	Pos	N5-Acetyl-N2-gamma-L-glutamyl-L-ornithine	335.087	304.15	0.568517	0.00261988	0.00363823	0.00527318
49	Pos	Tyrosyl-Alanine	267.786	253.118	0.559168	0.00495462	0.0141184	0.000432407
50	Pos	Osmundalactone	392.326	129.055	0.548558	0.00669091	0.0351738	1.17845e-07
51	Pos	4-Pyridoxic acid	143.275	184.064	0.532844	1.19401	2.20242	1.4103e-07
52	Pos	LysoPC(18:2(9Z,12Z))	78.6977	520.327	0.52929	0.000127696	0.000920842	0.00249647
53	Pos	4-(4-Hydroxyphenyl)-2-butanone O-[2,6-digalloylglucoside]	256.844	631.171	0.517491	9.05107e-06	0.00668669	0.000397515
54	Pos	Threoninyl-Leucine	262.141	233.15	0.516326	0.0212	0.0406785	0.00128899
55	Pos	Curcumin I	61.6262	397.164	0.511789	0.00564066	0.00770038	0.00658965
56	Pos	Diosbulbin B	244.762	345.127	0.510692	0.00316362	0.00483586	0.00423059
57	Pos	4-(4-Methyl-3-pentenyl)-3-cyclohexene-1-carboxaldehyde	90.8251	193.159	0.508661	0.0200553	0.030642	0.00212293
58	Pos	N-Carbamoylsarcosine	256.783	133.061	0.502375	0.00296574	0.0090316	0.000428423
59	Pos	2',4,4'-Trihydroxy-6'-methoxy-3',5'-diprenylchalcone	490.512	423.209	0.498911	3.12183e-05	0.000181657	0.0265144
60	Pos	Dimethyl 2-galloylgalactarate	307.115	391.085	0.491127	0.000316701	0.00461208	0.000114465
61	Pos	myo-Inositol	306.94	203.053	0.483087	0.0123058	0.0662406	6.59633e-05
62	Pos	cis-Acetylacrylate	256.378	115.039	0.480867	9.05107e-06	0.0510491	4.82618e-06
63	Pos	Melibiose	374.408	360.15	0.458686	0.0311881	3.32696	5.36185e-06
64	Pos	1-O-E-Cinnamoyl-(6-arabinosylglucose)	253.809	443.16	0.456845	0.00132524	0.0022232	0.00768665
65	Pos	Biotin amide	78.6029	244.118	0.452416	0.0107512	0.0279722	6.82291e-05
66	Pos	Erinacine C	71.7603	435.27	0.446408	9.05107e-06	0.00362657	3.72654e-05
67	Pos	Dexamethasone	253.427	393.213	0.430956	0.00608485	0.00884265	0.00197593
68	Pos	L-Galactose	258.527	198.097	0.427676	0.00531945	0.195851	0.000163709
69	Pos	5',5''',8,8''-Tetrahydroxy-3',3''',4',4''',7',7''-hexamethoxy-5,5''-biflavan	249.967	663.251	0.421456	9.05107e-06	0.00154813	0.01562
70	Pos	Prunin 6''-O-gallate	267.79	587.13	0.413397	9.05107e-06	0.00993885	0.000542345
71	Pos	7-Aminomethyl-7-carbaguanine	116.65	180.086	0.40677	0.0391349	1.78305	4.72332e-06
72	Pos	3-O-Caffeoylshikimic acid	293.085	337.098	0.399536	0.00231988	0.0301312	0.00332168
73	Pos	Bakers yeast extract	111.822	275.112	0.395493	0.02674	0.0361463	0.000347429
74	Pos	cis-p-Coumaric acid 4-[apiosyl-(1->2)-glucoside]	296.153	459.155	0.39332	0.000462414	0.00206479	0.0104574
75	Pos	(all-E)-1,7-bis(4-hydroxyphenyl)-1,4,6-heptatrien-3-one	111.84	293.123	0.391456	0.0264122	0.0332383	0.0056497
76	Pos	1-(gamma-Glutamylamino)cyclopropanecarboxylic acid	304.374	231.097	0.37494	0.0167272	0.0585631	6.23968e-05
77	Pos	4-Methoxybenzenepropanol 1-(2-sulfoglucoside)	187.173	409.119	0.368658	0.000652979	0.0186571	0.00672801
78	Pos	N-gamma-L-Glutamyl-D-alanine	297.622	219.098	0.360264	0.00261978	0.00395888	0.000755197
79	Pos	N-cis-Feruloyltyramine	181.59	314.145	0.352732	0.00167273	0.0107853	7.46405e-08
80	Pos	Cadabicine methyl ether	151.447	450.244	0.340544	4.54562e-05	0.000231995	0.0042287
81	Pos	Plantaricin BN	132.292	485.249	0.323056	6.78364e-05	0.00268817	0.00647568
82	Pos	Ketosantalic acid	583.776	251.16	0.31999	0.000819892	0.0053055	0.00823193
83	Pos	7-Hydroxyheptaphylline	161.392	296.134	0.318173	0.00204037	0.0326305	6.41101e-05
84	Pos	(R)-Higenamine	293.507	272.134	0.312188	9.05107e-06	0.186393	8.21304e-06
85	Pos	1-Pyrroline	53.7662	70.0653	1	0.0126092	0.00909113	0.00115743
86	Pos	Phosphoric acid	281.359	98.9845	0.999981	0.11101	0.0625634	1.05488e-06
87	Pos	Adenine	162.508	136.061	0.999867	40.4934	28.1481	5.19165e-06
88	Pos	5-Aminopentanoic acid	589.483	118.086	0.999856	6.58511	4.97985	1.64823e-05
89	Pos	L-Valine	281.36	118.086	0.999802	12.7411	10.7565	0.000245704
90	Pos	Pyridine	380.008	80.0499	0.999766	0.0389463	0.0288352	0.000628152
91	Pos	Betaine	414.615	118.086	0.999427	1.62315	1.28774	0.000652798
92	Pos	Pyrrolidonecarboxylic acid	409.169	130.05	0.998922	0.747824	0.472791	1.02251e-05
93	Pos	L-Lysine	525.512	147.113	0.998828	3.72863	2.33913	8.52939e-07
94	Pos	D-Proline	317.444	116.071	0.998816	4.15216	3.48812	0.0025219
95	Pos	Oxolan-3-one	196.131	87.0444	0.998283	5.61732	3.74646	6.64901e-06
96	Pos	L-Norleucine	331.796	132.102	0.997995	0.658631	0.485726	6.70081e-05
97	Pos	Epsilon-caprolactam	45.9178	114.091	0.997964	0.0307516	0.0256701	0.0110178
98	Pos	Kaempferol	179.389	287.055	0.997514	0.372205	0.251474	1.51072e-05
99	Pos	Choline	262.363	104.107	0.997431	29.1302	24.229	0.00243451
100	Pos	4-Methoxybenzyl O-(2-sulfoglucoside)	427.083	381.079	0.99719	0.0471868	0.0190735	0.00579478
101	Pos	Tyramine	229.89	138.091	0.997077	14.5072	9.66528	1.91785e-05
102	Pos	Thiamine	345.392	265.111	0.997063	0.36584	0.230668	2.55907e-07
103	Pos	gamma-Aminobutyric acid	380.008	104.071	0.99666	23.8648	16.1539	2.65082e-06
104	Pos	Ornithine	507.617	133.097	0.996556	1.88271	1.33388	0.000585328
105	Pos	Acetylcholine	196.232	146.117	0.996119	79.6346	50.8109	2.81702e-06
106	Pos	3-Methyladenine	246.725	150.077	0.995966	0.260418	0.229312	0.00611866
107	Pos	1-deoxy-1-(N6-lysino)-D-fructose	415.92	134.045	0.995828	3.26948	2.1655	5.39263e-06
108	Pos	p-Aminobenzoic acid	294.804	138.055	0.995265	17.3299	12.4876	1.79391e-06
109	Pos	3-Isoxazolidinone	415.94	88.0398	0.995098	0.209756	0.134814	1.51142e-06
110	Pos	1H-Pyrrole-2-carboxaldehyde	178.244	96.0448	0.995061	0.0413408	0.0299977	8.68324e-05
111	Pos	L-Histidine	396.821	156.077	0.994678	3.79784	2.39051	0.00297234
112	Pos	BL V	330.68	425.084	0.99399	0.00344745	0.00217888	3.59167e-05
113	Pos	Kaempferol 3-O-glucosyl-(1->2)-rhamnoside	271.058	595.165	0.993973	0.336118	0.123205	1.64577e-06
114	Pos	Tryptamine	203.948	161.107	0.993732	0.819693	0.198113	3.09412e-09
115	Pos	(-)-Aspidospermine	149.536	355.245	0.99367	0.0810733	0.0572949	3.51142e-05
116	Pos	Trimethylamine N-oxide	318.774	76.0762	0.993668	0.0116338	0.00679703	0.000220983
117	Pos	L-Asparagine	385.595	133.06	0.993534	10.4056	6.77418	8.93615e-06
118	Pos	Norvaline	38.3577	118.086	0.992884	13.0721	7.76084	3.82738e-05
119	Pos	3alpha,4,7,7alpha-Tetrahydro-1H-isoindole-1,3(2H)-dione	205.099	152.071	0.992737	0.0177927	0.011788	0.00557123
120	Pos	2-Azetidinecarboxylic acid	339.656	102.055	0.992555	0.121263	0.0799431	0.000807382
121	Pos	Physalin I	222.029	559.215	0.992438	0.00352249	0.00125969	0.0350242
122	Pos	Genistein	241.082	271.06	0.9916	0.00323941	0.00153121	1.10835e-05
123	Pos	Arabinosylhypoxanthine	237.496	269.088	0.990779	0.0152826	0.00966956	0.000710585
124	Pos	D-Glutamine	383.354	147.076	0.990091	1.96647	0.360634	3.55659e-06
125	Pos	Quinoline	212.994	130.065	0.989982	0.043847	0.0206684	0.000184743
126	Pos	Hypoxanthine	173.622	137.046	0.989849	18.731	12.9951	1.10325e-06
127	Pos	D-Serine	384.476	106.05	0.989725	0.896396	0.605318	7.13944e-05
128	Pos	Phenylacetaldehyde	305.456	121.065	0.989566	0.025929	0.0149099	6.08245e-06
129	Pos	L-Glutamic acid	409.193	148.06	0.989493	5.25332	3.36787	8.7201e-06
130	Pos	4-Aminophenol	41.0374	110.06	0.989225	0.0848143	0.0636063	0.00073296
131	Pos	3-Methylcytosine	194.042	126.066	0.988318	0.189437	0.141567	1.19116e-05
132	Pos	2-Aminoacrylic acid	385.594	88.0397	0.987877	0.115295	0.0746404	2.64115e-05
133	Pos	3-Methylguanine	160.292	166.072	0.987803	1.00518	0.65311	3.39994e-07
134	Pos	Cinncassiol C1 19-glucoside	222.642	543.241	0.98638	0.00751854	0.00415789	7.38836e-05
135	Pos	Alanyl-Leucine	246.708	203.139	0.9862	0.414197	0.246522	2.19626e-05
136	Pos	Acetylhydrazine	311.249	75.0558	0.985304	0.0152652	0.0111232	0.00290499
137	Pos	6-Methylquinoline	203.963	144.081	0.985203	2.74865	0.70882	1.06255e-09
138	Pos	1,3,5-Trihydroxybenzene	153.339	127.039	0.983941	0.0823134	0.0584625	1.01033e-06
139	Pos	Methylpyrazine	177.687	95.0607	0.983244	0.0883851	0.0731259	0.00548667
140	Pos	Gibberellin A90	503.646	349.16	0.982479	0.0042091	0.00290529	0.000203895
141	Pos	Phosphorylcholine	248.951	168.081	0.982021	0.206885	0.135047	9.39307e-05
142	Pos	Pyroglutamic acid	383.342	130.05	0.981898	0.86898	0.119029	5.73642e-06
143	Pos	Arecaidine	363.197	128.071	0.980767	1.98938	1.30148	1.29335e-05
144	Pos	Proline betaine	359.846	144.102	0.979046	12.6752	9.3715	9.33546e-06
145	Pos	(2R)-2-Hydroxy-2-methylbutanenitrile	54.882	100.076	0.978733	0.109456	0.0900063	0.000150252
146	Pos	Luteolin	304.375	287.055	0.978276	0.0168432	0.00353036	4.52883e-07
147	Pos	Lysyl-Glycine	331.807	204.134	0.976191	0.125384	0.0945909	0.000161244
148	Pos	Riboflavin	227.139	377.146	0.975893	0.0127172	0.0076935	3.06703e-05
149	Pos	Diethanolamine	343.93	106.087	0.974973	0.0275119	0.0205648	1.02344e-05
150	Pos	Pi-Methylimidazoleacetic acid	83.1963	141.066	0.974338	8.69008	4.76805	3.62968e-07
151	Pos	Daidzein	101.495	255.065	0.973893	0.00824566	0.00430555	0.000251041
152	Pos	FAPy-adenine	176.005	154.072	0.973635	0.15201	0.104715	7.00313e-06
153	Pos	Tetramethylpyrazine	214.155	137.107	0.973282	0.0125316	0.00776202	2.19636e-05
154	Pos	Trigonelline	390.087	138.055	0.972737	0.0675431	0.0448594	0.0276607
155	Pos	Pipecolic acid	525.6	130.086	0.97268	1.28587	0.815977	4.36582e-06
156	Pos	1-Nitro-7-glutathionyl-8-hydroxy-7,8-dihydronaphthalene	461.068	497.148	0.972569	0.0043428	0.00331229	0.00175854
157	Pos	(Â±)-Tryptophan	274.348	205.097	0.971106	0.617369	0.150596	3.51575e-10
158	Pos	7-Aminoclonazepam	215.173	286.071	0.970921	0.00346436	0.00214553	0.00168476
159	Pos	Sojagol	388.967	337.11	0.970828	0.013194	0.00650179	0.000537795
160	Pos	5'-Deoxy-5-fluorouridine	217.529	247.078	0.970489	0.258565	0.162028	2.06426e-05
161	Pos	2-Piperidinone	344.165	100.076	0.967877	0.0459423	0.028209	0.0390057
162	Pos	1H-Indole-3-carboxaldehyde	271.313	146.06	0.967175	0.0382256	0.0228262	1.37268e-05
163	Pos	Metenamine	297.649	141.113	0.966026	0.224966	0.16247	9.76861e-07
164	Pos	Erythrono-1,4-lactone	163.262	119.035	0.965793	0.0570174	0.038511	1.5862e-06
165	Pos	Camellianin B	186.258	579.183	0.965247	0.0387315	0.0302765	0.00383951
166	Pos	Pyridoxine	88.7587	170.081	0.964394	2.01805	1.74399	0.00650042
167	Pos	Protein serine	399.082	106.05	0.96345	0.167426	0.0930659	8.99715e-05
168	Pos	L-Targinine	506.469	189.134	0.962187	2.01117	1.49171	0.000864975
169	Pos	Osmanthuside B	189.506	593.22	0.959978	0.0102332	0.00776018	0.00254806
170	Pos	4-(4-Hydroxyphenyl)-2-butanone O-[2-galloyl-6-cinnamoylglucoside]	190.647	609.195	0.958645	0.00974131	0.00740176	0.00124376
171	Pos	Methyl 3,4-dihydroxy-5-prenylbenzoate 3-glucoside	354.248	399.164	0.958249	0.00294123	0.00184559	0.00281727
172	Pos	Pyrophaeophorbide a	71.7248	535.268	0.958161	0.00372943	4.93287e-05	3.08553e-05
173	Pos	L-Tyrosine	313.513	182.081	0.958062	1.13526	0.928189	0.00101307
174	Pos	3-Ethylpyridine	359.846	108.081	0.957355	0.151481	0.111056	5.26599e-06
175	Pos	(+)-2,3-Dihydro-3-methyl-1H-pyrrole	525.637	84.0812	0.956834	0.342469	0.220663	2.11052e-06
176	Pos	Asymmetric dimethylarginine	506.389	203.15	0.956661	1.12707	0.754055	0.000184712
177	Pos	3-(2-Furanyl)-2-propenal	135.916	123.044	0.956582	0.0208873	0.0130861	5.57798e-05
178	Pos	1-Methylhypoxanthine	88.5637	151.061	0.956327	0.208825	0.141403	9.37383e-05
179	Pos	(alpha-D-mannosyl)7-beta-D-mannosyl-diacetylchitobiosyl-L-asparagine, isoform A (protein)	374.413	90.0553	0.953658	1.57751	0.661732	1.57859e-08
180	Pos	Garciduol B	192.779	503.095	0.953195	0.000227519	6.87245e-06	0.00897138
181	Pos	Cyanidin 3-(4-acetylglucoside)	174.459	491.118	0.950874	0.0026163	0.0008258	5.47631e-05
182	Pos	2-Isopropylphenyl methylcarbamate	336.407	194.118	0.944366	0.462924	0.342073	0.00223515
183	Pos	Fenpropimorph	189.422	304.263	0.943603	9.05107e-06	6.87245e-06	6.77009e-05
184	Pos	2-Pentyloxazole	62.75	140.107	0.943489	0.271679	0.174293	3.84541e-06
185	Pos	beta-D-Glucosamine	138.186	180.088	0.94155	0.175396	0.105539	2.43852e-06
186	Pos	L-Theanine	52.6724	175.107	0.940627	2.04342	1.30647	3.24361e-06
187	Pos	2-Methoxy-4-vinylphenol	220.611	151.075	0.940548	0.0604957	0.0454606	0.00017231
188	Pos	Simmondsin	509.267	376.171	0.940327	0.00107351	0.000663226	4.24196e-05
189	Pos	Secoeremopetasitolide B	311.547	395.202	0.940219	0.00207012	0.000457739	0.000777734
190	Pos	1-(1-Pyrrolidinyl)-2-butanone	357.605	142.123	0.939905	0.135259	0.092341	6.49797e-06
191	Pos	Leucyl-Tyrosine	226.006	295.165	0.938838	0.140659	0.0907129	0.000151045
192	Pos	Citreoviridinol A1	332.087	421.185	0.938549	0.00514577	0.00282747	0.00230041
193	Pos	Glycyltyrosine	293.691	239.103	0.934895	0.00644308	0.0038257	0.000177218
194	Pos	Thyrotropin releasing hormone	478.129	363.176	0.934883	0.0085765	0.00554648	0.000185375
195	Pos	Formylfusarochromanone	420.435	321.144	0.93416	0.0237294	0.0165718	0.000427246
196	Pos	Piperidine	279.397	86.0968	0.932978	1.79079	1.20095	3.58662e-06
197	Pos	Diisopropyl sulfide	310.467	119.09	0.932253	0.376664	0.229807	2.80285e-07
198	Pos	1-(1-Pyrrolidinyl)-2-propanone	331.785	128.107	0.932248	12.0787	8.44856	2.3128e-05
199	Pos	(+)-Gallocatechin	177.863	307.081	0.931941	0.0279646	0.0122416	5.01368e-05
200	Pos	2'-Hydroxyacetophenone	50.558	137.06	0.931785	0.103728	0.0725468	0.000185198
201	Pos	Racemethionine	295.922	150.058	0.931657	1.62126	1.15605	0.00011664
202	Pos	L-Histidinol	345.306	142.097	0.930847	0.567596	0.39141	0.000357475
203	Pos	3-Methylhistidine	397.872	170.092	0.928953	0.241227	0.159311	4.93927e-05
204	Pos	1-Pentanesulfenothioic acid	141.253	137.046	0.928335	0.0335378	0.0135999	1.23163e-05
205	Pos	1-Pyrroline-2-carboxylic acid	65.0056	114.055	0.927287	0.0262511	0.0209051	0.00373843
206	Pos	2-(1-Pyrrolidinyl)-3-pentanone	170.078	156.138	0.927173	0.0378676	0.0222463	3.54098e-06
207	Pos	LysoPE(22:0/0:0)	211.851	538.387	0.924562	9.05107e-06	6.87245e-06	6.77009e-05
208	Pos	Suberylglycine	169.113	232.118	0.924203	0.133064	0.076329	0.00361182
209	Pos	(9S,10E,12Z,15Z)-9-Hydroxy-10,12,15-octadecatrienoic acid	150.226	277.216	0.921645	0.168727	0.0971169	2.53514e-05
210	Pos	(Â±)-erythro-Isoleucine	279.397	132.102	0.918342	14.2102	9.41029	1.90315e-06
211	Pos	5-Oxo-2(5H)-isoxazolepropanenitrile	174.392	139.05	0.917813	0.0480361	0.0323772	0.000141126
212	Pos	Alpha-dimorphecolic acid	149.449	279.231	0.915519	0.4721	0.294769	1.05765e-06
213	Pos	Cytosine	107.114	112.059	0.914575	0.0470815	0.0403768	0.00455015
214	Pos	Mukoenine A	444.02	266.159	0.914485	0.86394	0.572129	1.95823e-05
215	Pos	Dimethylethanolamine	257.9	90.0918	0.913938	0.375046	0.0710439	8.56746e-07
216	Pos	gamma-Glutamylalanine	420.401	219.098	0.913263	0.108364	0.0681482	1.76276e-06
217	Pos	Leucyl-Isoleucine	200.619	245.186	0.912596	0.788284	0.491733	2.56101e-06
218	Pos	Citreorosein	43.7042	287.055	0.911811	0.215146	0.119854	0.00101032
219	Pos	4'-Hydroxy-5,7-dimethoxyflavan	405.817	287.124	0.911114	0.0214926	0.0158848	0.00112424
220	Pos	O-Acetylethanolamine	39.705	104.071	0.911101	3.53093	2.01075	2.14842e-07
221	Pos	1-(Hydroxymethyl)-5,5-dimethyl-2,4-imidazolidinedione	79.128	159.076	0.910857	0.0259345	0.0170746	0.00632348
222	Pos	6''-O-Acetyldaidzin	323.223	459.141	0.90895	0.00159835	0.00070005	1.32239e-05
223	Pos	Allyl crotonate	184.966	127.073	0.906686	0.0198344	0.015476	0.000896591
224	Pos	Pantothenic acid	284.785	220.118	0.905634	0.260144	0.143222	2.3006e-07
225	Pos	Phenylalanyl-Arginine	325.238	322.187	0.903473	0.0023048	0.00177513	0.00317871
226	Pos	7-(Methylthio)heptanenitrile	114.281	158.096	0.902709	17.8348	15.272	0.00552081
227	Pos	Tangeritin	302.394	395.121	0.89948	0.0111147	0.00646513	0.00070914
228	Pos	N-Lactoyl ethanolamine	170.094	134.081	0.899383	0.0569126	0.0419084	0.000122579
229	Pos	Norbixin	344.167	381.213	0.898936	0.00842072	0.00544452	3.25685e-06
230	Pos	Diosmetin 7-neohesperidoside	237.706	609.181	0.898828	0.000638098	0.000162793	0.0265485
231	Pos	1,2,5-Trimethyl-1H-pyrrole	331.791	110.097	0.898171	1.14782	0.795228	1.63339e-05
232	Pos	5-Phenyl-1,3-oxazinane-2,4-dione	288.066	192.065	0.897207	0.00380107	0.00273868	0.00249369
233	Pos	1,6-Dihydroxy-3,7-dimethoxy-2-(3-methyl-2-butenyl)-8-(3-hydroxy-3-methyl-1E-butenyl)-xanthone	324.771	441.189	0.895538	0.00808814	0.00567614	0.00145841
234	Pos	4-Deacetylneosolaniol	340.773	341.159	0.893932	0.00308759	0.00190757	0.00460226
235	Pos	Valyl-Phenylalanine	200.619	265.154	0.893446	0.369818	0.252055	0.000127251
236	Pos	2,5-Dimethyloxazole	286.697	98.0604	0.891184	0.0153872	0.0116906	0.00237742
237	Pos	10-Hydroxy-3-methoxy-1,3,5,7-cadinatetraen-9-one	428.252	261.144	0.890451	0.129356	0.0833699	4.11921e-06
238	Pos	Theogallin	364.374	345.079	0.889744	0.164123	0.0925143	2.09466e-08
239	Pos	4-Ethyl-5-methyl-2-(1-methylethyl)thiazole	114.281	170.096	0.887815	14.9753	13.0554	0.00520225
240	Pos	Rosmic acid	468.22	391.171	0.887732	0.00458357	0.00276373	0.000355212
241	Pos	(S,E)-Zearalenone	501.942	319.15	0.886356	0.0073397	0.00467723	9.01478e-05
242	Pos	Glycerophosphocholine	393.468	258.11	0.882391	0.583249	0.462678	0.000695794
243	Pos	Saccharopine	463.304	277.139	0.880453	0.0313299	0.0198073	4.15557e-05
244	Pos	N-(5-Methyl-3-oxohexyl)alanine	359.848	202.144	0.87976	3.08166	2.09333	2.98751e-05
245	Pos	1,2,5,6-Tetrahydro-4H-pyrrolo[3,2,1-ij]quinolin-4-one	193.014	174.091	0.878841	0.519706	0.353167	4.73384e-06
246	Pos	Isoleucyl-Phenylalanine	189.447	279.17	0.878231	0.976157	0.59639	1.65803e-07
247	Pos	Prolyl-Valine	298.454	215.139	0.87822	0.541662	0.379893	0.000215373
248	Pos	3-Chloro-1-(4-hydroxy-3-methoxyphenyl)-1,2-propanediol	288.07	233.063	0.874796	0.0242898	0.0125171	1.32186e-05
249	Pos	1-Hydroxy-3,6,7-trimethoxy-2,8-diprenylxanthone	433.853	439.219	0.873995	0.0015144	0.00106597	0.00804273
250	Pos	2',4'-Dimethylacetophenone	129.363	149.096	0.873187	0.0597646	0.0469221	0.00082477
251	Pos	Quercetin 3-(6''-malonyl-glucoside)	300.962	551.103	0.872626	0.00324501	0.000783317	0.00144419
252	Pos	(R)-Marmin	478.055	333.165	0.870324	0.00228942	0.00164187	0.000335738
253	Pos	S-Cysteinosuccinic acid	464.467	238.038	0.869695	0.0525988	0.0308288	7.27704e-06
254	Pos	3b-Hydroxy-6b-angeloyloxy-7(11)-eremophilen-12,8b-olide	76.5547	349.198	0.867124	0.00445888	0.0026607	1.63437e-06
255	Pos	2-Methylbutyroylcarnitine	373.294	246.17	0.866471	0.285521	0.0385552	8.32261e-06
256	Pos	Phenylalanyl-Glycine	247.843	223.107	0.866305	0.0561223	0.037313	0.000155251
257	Pos	Dihydromorelloflavone	158.061	559.123	0.863593	0.00616087	0.000851577	0.0011858
258	Pos	Glutaminylarginine	439.493	303.177	0.86247	0.00535981	0.00333565	1.96642e-05
259	Pos	Alanyl-Arginine	422.062	246.156	0.862215	0.0859338	0.0642322	0.000159802
260	Pos	(+)-12a-Hydroxypachyrrhizone	104.273	383.076	0.859434	0.0123818	0.00462275	0.0115933
261	Pos	3-Aminobutanoic acid	449.644	104.071	0.858978	0.797339	0.577706	0.000128734
262	Pos	3-Acetamidobutanal	132.287	130.086	0.858459	0.0438315	0.0256407	0.000398672
263	Pos	Glucopyranosylmoranoline	419.312	326.144	0.856581	1.82462	1.17953	7.62549e-06
264	Pos	L-prolyl-L-proline	376.645	213.123	0.855097	0.0987233	0.04775	8.85441e-08
265	Pos	Phenylalanyl-Serine	251.185	253.118	0.851109	0.007545	0.00600695	0.000395981
266	Pos	N-[2-(4-Prenyloxyphenyl)ethyl]tiglamide	238.733	288.191	0.850579	0.227419	0.145237	0.000573491
267	Pos	Arginyl-Valine	365.483	274.187	0.849994	0.235128	0.154916	1.53871e-05
268	Pos	4-Trimethylammoniobutanoic acid	252.575	146.117	0.847796	2.0508	1.13091	2.86197e-08
269	Pos	(R)-2-Nitro-p-mentha-1,5-diene	81.9338	182.117	0.845619	0.0170211	0.0141861	0.0023648
270	Pos	L-Isoleucine	196.82	132.102	0.841547	7.22431	6.41001	0.00532016
271	Pos	N6-Acetyl-L-lysine	358.771	189.123	0.840569	0.266428	0.171624	1.1476e-06
272	Pos	N-Methylcalystegine B2	354.248	190.107	0.839991	0.111128	0.0664309	2.82597e-06
273	Pos	1,2,10-Trihydroxydihydro-trans-linalyl oxide 7-O-beta-D-glucopyranoside	354.252	383.191	0.839269	0.00467241	0.00232265	2.71514e-05
274	Pos	L-2-Amino-5-hydroxypentanoic acid	337.528	134.081	0.838431	0.395433	0.264647	7.23044e-06
275	Pos	Dihydro-6-isopropyl-2,4-dimethyl-4H-1,3,5-dithiazine	80.6388	192.086	0.833682	0.0113479	0.00697919	0.000228585
276	Pos	Nicotinic acid mononucleotide	346.52	256.081	0.830795	0.0876244	0.0587457	1.82612e-06
277	Pos	2-Methoxy-3-methylpyrazine	50.9881	125.071	0.830673	0.0832369	0.0575539	0.00663078
278	Pos	1,2-Dimethoxy-13-methyl-[1,3]benzodioxolo[5,6-c]phenanthridine	401.303	348.129	0.829853	0.0116934	0.00785609	3.17494e-05
279	Pos	Edulone A	208.453	415.136	0.827919	0.00652888	0.0037351	0.00149832
280	Pos	Prolyl-Aspartate	418.129	231.097	0.826459	0.116662	0.0744173	1.00277e-07
281	Pos	5,7-Dihydroxy-3',4'-dimethoxy-8-(3-hydroxy-3-methylbutyl)-isoflavone 7-glucoside	187.018	563.21	0.826357	0.0445719	0.0334249	1.09836e-05
282	Pos	2-(4-Methoxyphenoxy)propanoic acid	97.5532	197.081	0.825288	0.0137662	0.00957619	0.000162597
283	Pos	Isopetasoside	338.55	397.22	0.825149	0.000904994	0.00047589	7.8984e-06
284	Pos	1-Formylneogrifolin	537.917	357.249	0.823801	0.556503	0.35373	2.44528e-06
285	Pos	Isobutyric acid	128.066	89.0601	0.820565	9.05107e-06	6.87245e-06	6.77009e-05
286	Pos	Valyl-Valine	230.992	217.154	0.820399	0.431886	0.256608	1.896e-05
287	Pos	N-Carboxyethyl-g-aminobutyric acid	135.916	176.092	0.819718	0.50653	0.325817	5.51457e-06
288	Pos	Morphine	398.018	286.151	0.816681	0.256608	0.20043	0.00283273
289	Pos	3-Dehydrosphinganine	107.993	300.289	0.816472	0.174452	0.047137	0.000102315
290	Pos	3-(4-Isopropylphenyl)propanal	97.4736	177.127	0.811535	0.0211116	0.0131115	0.000300137
291	Pos	L-beta-aspartyl-L-glycine	436.651	191.066	0.810375	0.0102303	0.00678193	0.000173164
292	Pos	D-Linalool 3-glucoside	353.143	317.193	0.809927	0.00950995	0.00603838	6.08061e-05
293	Pos	2-(1-Pentenyl)furan	90.9093	137.096	0.809795	0.0763265	0.064682	0.00271264
294	Pos	L-Glutamine	430.524	147.076	0.809752	0.0280682	0.00960608	0.000110184
295	Pos	5-Butyloxazole	96.3728	126.091	0.80812	0.794225	0.490852	6.18228e-07
296	Pos	Phytosphingosine	146.84	318.3	0.802258	0.0428233	0.00760427	8.63763e-05
297	Pos	Prolyl-Alanine	345.291	187.108	0.802255	0.834613	0.581951	1.21905e-07
298	Pos	Pseudooxynicotine	229.697	179.118	0.802254	0.338952	0.225813	4.83969e-06
299	Pos	Prolylglycine	358.723	173.092	0.801885	0.059222	0.0372342	0.00618388
300	Pos	Alcoifosfamide	308.223	279.039	0.801694	0.0794524	0.00977193	1.05757e-08
301	Pos	Spirolide F	138.345	728.51	0.79981	9.05107e-06	6.87245e-06	6.77009e-05
302	Pos	Merodesmosine	440.713	403.255	0.799466	0.0216794	0.0123943	3.79323e-06
303	Pos	Alanyl-Valine	292.61	189.123	0.799174	0.0264555	0.0150566	0.000276472
304	Pos	N-Acetylneuraminic acid	104.954	310.114	0.797475	0.0770107	0.0507693	1.11978e-05
305	Pos	PC(16:0/16:0)	163.637	734.568	0.794351	9.05107e-06	6.87245e-06	6.77009e-05
306	Pos	Leucyl-Serine	277.078	219.134	0.793921	0.0791531	0.0598747	0.00179897
307	Pos	Norfluoxetine	395.736	296.134	0.790609	0.859261	0.520135	2.2311e-05
308	Pos	1-Isothiocyanato-8-(methylthio)octane	401.317	218.102	0.788991	0.110597	0.0722323	0.00167917
309	Pos	Citreovirenone	151.936	249.116	0.788259	0.0203789	0.0152795	0.000502033
310	Pos	13-L-Hydroperoxylinoleic acid	150.211	295.227	0.78802	0.181456	0.078828	2.5987e-06
311	Pos	2-(Methylamino)benzoic acid	88.7587	152.071	0.786753	0.313838	0.264463	0.00409513
312	Pos	Acetaminophen	124.444	152.071	0.786407	0.0388945	0.0299926	0.000275708
313	Pos	2-Methylbutyrylglycine	337.429	160.097	0.785156	0.65515	0.432341	6.8757e-05
314	Pos	N-Butyrylglycine	104.279	146.081	0.784858	0.0930389	0.0709641	0.00320001
315	Pos	6-Chloro-N-(1-methylethyl)-1,3,5-triazine-2,4-diamine	273.532	188.07	0.784688	0.5397	0.145331	3.05106e-05
316	Pos	Glycerol	294.474	93.0573	0.78286	0.00834881	0.00612011	0.000155611
317	Pos	3-Methylglutarylcarnitine	232.14	290.16	0.781947	0.0509723	0.0371136	0.00188481
318	Pos	trans-S-(1-Propenyl)-L-cysteine	243.984	162.058	0.779781	1.11977	0.582412	6.56401e-08
319	Pos	Methylmalonic acid semialdehyde	122.1	103.039	0.778437	0.042335	0.0284366	8.13623e-07
320	Pos	Rutarin	190.666	425.141	0.778168	0.0141571	0.0106527	0.000333255
321	Pos	5'-O-Desmethyl omeprazole	340.529	332.111	0.778158	0.00137824	0.000827992	0.00807503
322	Pos	5-Hexyl-1,4-dioxan-2-one	92.9942	187.133	0.77555	0.0239265	0.0160384	1.59329e-05
323	Pos	Linamarin	424.946	265.14	0.77286	0.00800388	0.0052136	0.000132303
324	Pos	Oxypinnatanine	290.323	261.108	0.772661	0.0168464	0.0130328	0.000716553
325	Pos	Morin	178.005	303.05	0.770612	0.0161308	0.00903203	3.04011e-05
326	Pos	Histidinal	188.299	140.082	0.770012	9.05107e-06	6.87245e-06	6.77009e-05
327	Pos	Diaminopimelic acid	486.388	191.103	0.766834	0.00962528	0.00710607	0.00135821
328	Pos	Methylimidazole acetaldehyde	344.2	125.071	0.766354	0.0857606	0.058965	0.000806693
329	Pos	4,8 Dimethylnonanoyl carnitine	269.06	330.263	0.766045	4.38318	2.36356	2.54458e-07
330	Pos	Nor-psi-tropine	355.36	128.107	0.76543	0.14661	0.0992683	9.551e-05
331	Pos	Octadecanamide	115.471	284.294	0.764393	0.00679921	6.87245e-06	0.000152215
332	Pos	Indoleacrylic acid	307.448	188.074	0.761315	0.148226	0.0219136	3.89816e-07
333	Pos	Armillaramide	96.436	556.53	0.758221	9.05107e-06	6.87245e-06	6.77009e-05
334	Pos	Lysyl-Valine	534.485	246.181	0.757398	1.24099	0.838498	4.50341e-06
335	Pos	5,10-Methylene-THF	417.059	458.187	0.754998	0.00495876	0.00349933	0.000139773
336	Pos	1-Aminocyclopropanecarboxylic acid	229.899	102.047	0.753725	0.0203159	0.0124607	0.000528451
337	Pos	20-Hydroxyeicosatetraenoic acid	29.132	321.242	0.753364	0.043411	0.0297768	0.000558517
338	Pos	Monoethyl malonic acid	133.408	133.05	0.752483	0.0889641	0.0543354	0.000104182
339	Pos	Vignatic acid B	355.336	520.312	0.751226	0.00281344	0.000895003	0.000165941
340	Pos	N6-cis-p-Coumaroylserotonin	482.505	323.145	0.748181	0.00519418	0.00342436	5.83035e-05
341	Pos	2,2,6,7-Tetramethylbicyclo[4.3.0]nona-1(9),4-dien-8-one	91.0817	191.143	0.748135	0.0802752	0.0680862	0.00798282
342	Pos	Orcein	190.647	501.158	0.747761	0.00261651	0.00196672	0.000121649
343	Pos	2-Methylpiperidine	297.03	100.112	0.744696	0.0130711	0.0100165	0.0010914
344	Pos	2,6 Dimethylheptanoyl carnitine	308.951	302.233	0.74436	0.0766818	0.0266841	2.5236e-05
345	Pos	gamma-Glutamylleucine	370.361	261.144	0.741299	0.0233303	0.0151076	0.000545599
346	Pos	N-[(4E,8E)-1,3-dihydroxyoctadeca-4,8-dien-2-yl]hexadecanamide	89.657	536.503	0.740302	9.05107e-06	6.87245e-06	6.77009e-05
347	Pos	Pandamarilactam 3x	68.3568	236.132	0.738891	0.0454332	0.028713	4.60312e-05
348	Pos	Casuarine 6-alpha-D-glucoside	336.75	368.155	0.735222	0.00472496	0.00274913	0.000142026
349	Pos	2-Hydroxy-3-(4-methoxyphenyl)propanoic acid	169.256	197.081	0.734405	0.0175722	0.0136205	3.46041e-05
350	Pos	2-Methoxyestradiol	399.051	303.203	0.733289	0.0130682	0.00919221	6.87042e-05
351	Pos	Corticosterone	388.972	347.229	0.729641	0.0137841	0.0100842	0.000179544
352	Pos	LysoPE(18:1(9Z)/0:0)	184.961	480.308	0.724443	9.05107e-06	6.87245e-06	6.77009e-05
353	Pos	Tyrosine methylester	43.7622	196.097	0.72125	0.0649514	0.0434803	0.00108723
354	Pos	2-(2-Methylbutanoyl)-9-(3-methyl-2E-pentenoyl)-2b,9a-dihydroxy-4Z,10(14)-oplopadien-3-one	429.331	431.286	0.72088	0.00293699	0.00186587	0.00217908
355	Pos	3-Amino-2-piperidone	94.1281	115.087	0.720286	0.117454	0.0712766	1.59064e-07
356	Pos	11-Dehydro-thromboxane B2	463.267	369.224	0.719215	0.00567541	0.00343345	7.13284e-05
357	Pos	N-Acetylserine	168.117	148.06	0.71874	0.0197474	0.0106365	4.60114e-05
358	Pos	N-Acetyldehydroanonaine	396.727	306.118	0.718583	0.0107686	0.0064173	8.85165e-05
359	Pos	Dehydrophytosphingosine	140.826	316.284	0.71705	0.755709	0.250617	9.70751e-08
360	Pos	Cadabicine	482.958	436.218	0.71685	0.05832	0.0346546	5.3792e-06
361	Pos	p-Menth-1-en-4-ol	362.851	154.134	0.716094	0.0314739	0.0219289	5.07304e-05
362	Pos	3-Aminocaproic acid	35.9057	132.102	0.713436	0.167518	0.118658	0.000434448
363	Pos	4-Ethyl-2-heptylthiazole	53.7655	212.143	0.711867	0.0348485	0.0224864	4.38265e-05
364	Pos	Geranyl phenylacetate	24.5647	273.185	0.711455	0.00163583	0.0011021	0.00324925
365	Pos	Homoarecoline	289.196	170.117	0.709676	0.0087442	0.00687483	0.00995279
366	Pos	2-Hydroxybenzyl alcohol	285.84	125.06	0.709565	0.0590591	0.039813	8.12889e-05
367	Pos	Hordatine B	172.608	581.334	0.706367	0.0151823	0.0113732	0.000569415
368	Pos	Homocarnosine	181.356	241.129	0.70529	0.0258401	0.0146328	1.26304e-07
369	Pos	Methylimidazoleacetic acid	226.542	141.066	0.702235	0.165893	0.137443	0.01092
370	Pos	Sciadonic acid	30.2746	307.262	0.7005	0.0436741	0.0223969	0.00698909
371	Pos	L-2,3-Dihydrodipicolinate	78.4537	170.045	0.700486	9.05107e-06	6.87245e-06	6.77009e-05
372	Pos	Isopulegone caffeate	168.123	317.182	0.69677	0.0112939	0.00773801	2.06906e-06
373	Pos	2-Keto-6-acetamidocaproate	94.1855	188.092	0.694111	0.0218522	0.0184128	0.000548807
374	Pos	N-(gamma-Glutamyl)ethanolamine	382.236	191.103	0.693277	0.0499787	0.0384669	0.00142984
375	Pos	1,3,5-Trihydroxy-10-methylacridone	284.724	258.074	0.692358	0.00523761	0.00361986	0.00883912
376	Pos	Valyl-Aspartate	396.838	233.113	0.685808	0.0433336	0.0317655	0.0003031
377	Pos	Tryptophyl-Arginine	330.68	361.198	0.68372	0.00141988	0.00070705	0.00654876
378	Pos	(3beta,22E,24R)-5,8-Epidioxy-23-methylergosta-6,22-dien-3-ol	248.963	443.348	0.683061	0.00441447	0.00286992	0.0212781
379	Pos	Theaspirone A	139.014	209.154	0.679963	0.1079	0.08572	0.00687884
380	Pos	4-O-alpha-D-Galactopyranosylcalystegine B2	427.144	338.145	0.679483	0.0242167	0.0153827	8.26637e-06
381	Pos	N-Isobutyl-2,4,8,10,12-tetradecapentaenamide	394.578	274.212	0.67822	0.0117132	0.00879172	0.00249484
382	Pos	Artemoin A	60.5107	551.503	0.678131	9.05107e-06	6.87245e-06	6.77009e-05
383	Pos	Sterebin A	91.1824	311.221	0.676224	0.0983828	0.0547219	1.91822e-06
384	Pos	Verimol G	415.914	347.193	0.672302	0.0133988	0.0109417	0.00630207
385	Pos	Isoleucyl-Tryptophan	206.224	318.181	0.670532	0.306545	0.149782	0.0001982
386	Pos	Fagomine	337.411	148.097	0.670188	0.532158	0.346307	1.32739e-05
387	Pos	LysoPC(P-16:0)	171.488	480.353	0.668729	9.05107e-06	6.87245e-06	6.77009e-05
388	Pos	Prolyl-Arginine	451.076	272.171	0.66523	0.129401	0.0967828	0.00179644
389	Pos	3',4',5'-Trimethoxytricetin 7-[rhamnosyl-(1->6)-glucoside]	236.614	653.207	0.664643	0.000586218	4.61826e-05	0.00561439
390	Pos	2-(Ethylamino)-4,5-dihydroxybenzamide	149.087	197.092	0.664485	0.00949661	0.00736909	0.00120046
391	Pos	Glandulone A	93.4908	247.133	0.664118	0.133811	0.0807031	3.70378e-06
392	Pos	2-[4-(3,4-Methylenedioxyphenyl)butyl]-4(1H)-quinolinone	346.33	322.149	0.658684	0.0416955	0.0261357	2.22294e-05
393	Pos	Arachidonic acid	30.2401	305.247	0.656374	0.0354389	0.0226808	0.00977052
394	Pos	N-Carbamoylputrescine	380.005	132.113	0.655952	0.242026	0.145619	2.12444e-05
395	Pos	5-Acetamidovalerate	285.851	160.097	0.654647	2.02609	1.37217	1.03851e-05
396	Pos	2-(4-Methyl-3-pentenyl)anthraquinone	386.715	291.13	0.653549	0.00292958	0.00155764	0.000371696
397	Pos	N-Acetyl-D-glucosamine	256.906	222.097	0.653292	0.0713288	0.0120824	0.000559256
398	Pos	N2-(2-Carboxymethyl-2-hydroxysuccinoyl)arginine	464.699	349.136	0.652872	0.0231214	0.0116294	7.33408e-05
399	Pos	xi-3-(4-Isopropylphenyl)-2-methylpropanal	189.437	191.143	0.648195	0.0455036	0.0284767	1.60219e-05
400	Pos	4,5-Dimethyloxazole	411.394	98.0604	0.645448	0.0326805	0.0210639	2.19807e-05
401	Pos	Etonogestrel	567.805	325.212	0.645073	0.00372795	0.00278962	0.0015762
402	Pos	Linoleamide	140.984	280.263	0.644981	0.00510418	0.00174949	3.66172e-06
403	Pos	Ramiprilat	420.359	389.214	0.638141	0.0023879	0.00145507	0.000748389
404	Pos	Cyanidin 3-glucoside	224.289	449.107	0.637949	0.0683	0.0258459	2.47355e-07
405	Pos	Hypoglycin B	394.578	271.129	0.634942	0.00757074	0.00520308	0.00240358
406	Pos	Diacetoxyscirpenol	488.682	367.171	0.633388	0.0525131	0.0311444	0.000144276
407	Pos	11,12,14-Trihydroxy-7-methoxy-8,11,13-abietatrien-20,6-olide	463.264	377.203	0.632652	0.00676271	0.0042498	0.000433513
408	Pos	Trans-2, 3, 4-Trimethoxycinnamate	167.463	239.091	0.6307	0.00637041	0.00421958	0.000318918
409	Pos	LysoPE(18:2(9Z,12Z)/0:0)	363.203	478.301	0.630335	0.0207281	0.0140676	0.0168324
410	Pos	Homocitrulline	348.644	190.119	0.622773	0.0175678	0.0120495	7.56393e-05
411	Pos	Cortisone	139.318	361.208	0.622732	0.0226893	0.0126982	7.45382e-05
412	Pos	Petunidin 3-glucoside	168.473	479.118	0.62176	0.00198185	0.00131925	0.00229774
413	Pos	Hexanoylglycine	132.466	174.112	0.620633	0.023601	0.0164112	0.000489702
414	Pos	Lucernol	177.816	285.047	0.620222	0.00602691	0.00347707	0.00262825
415	Pos	2-Acetylpyrrolidine	112.155	114.091	0.619363	0.169984	0.0817053	4.4218e-07
416	Pos	Dhurrin	150.791	334.092	0.618331	0.0194014	0.0106895	0.00110769
417	Pos	Tetraphyllin B	397.952	288.108	0.614112	0.133759	0.0859066	1.1328e-05
418	Pos	N-Acetyl-beta-alanine	149.085	132.066	0.613195	0.117904	0.0557333	1.92015e-06
419	Pos	Genomorphine	298.587	302.135	0.612652	0.00718588	0.00492038	1.84111e-05
420	Pos	N-(2R-Hydroxydocosanoyl)-2S-amino-1,3S,4R-octadecanetriol	120.186	656.609	0.612479	9.05107e-06	6.87245e-06	6.77009e-05
421	Pos	3-Methylindole	228.751	132.081	0.609853	0.0490574	0.0367064	0.00385674
422	Pos	Allyl benzoate	184.756	207.105	0.608935	0.746671	0.447553	5.54574e-08
423	Pos	11,12-Dihydrolactaroviolin	91.9472	213.123	0.607244	0.0230288	0.0165681	0.00272003
424	Pos	2-acetyl-1-alkyl-sn-glycero-3-phosphocholine	210.712	524.37	0.606745	9.05107e-06	6.87245e-06	6.77009e-05
425	Pos	Capsiamide	146.632	270.279	0.605683	9.05107e-06	6.87245e-06	6.77009e-05
426	Pos	Lysyl-Proline	473.856	244.166	0.603778	0.0665418	0.0432172	0.000146528
427	Pos	Mandelonitrile rutinoside	96.8984	442.171	0.601705	0.0202149	0.0126129	6.2891e-06
428	Pos	Glycyl-Valine	367.678	175.108	0.600879	1.50251	0.987706	7.60843e-06
429	Pos	4,5-Dihydropiperlonguminine	412.566	276.167	0.598191	0.0258407	0.018409	0.000183975
430	Pos	5-Amino-3-oxohexanoate	364.322	146.081	0.596123	21.0977	12.9595	7.27343e-06
431	Pos	N-Oleoylethanolamine	184.94	326.305	0.59343	9.05107e-06	6.87245e-06	6.77009e-05
432	Pos	Melitric acid B	490.177	521.111	0.593274	0.00329971	0.00207759	9.87865e-06
433	Pos	N-Methylcalystegine C1	183.856	206.102	0.592657	8.2811	5.06892	1.06443e-07
434	Pos	2-Phenylethyl 3-methylbutanoate	140.136	207.138	0.585119	0.0867722	0.0716377	0.00258637
435	Pos	3-Oxo-alpha-ionol 9-[apiosyl-(1->6)-glucoside]	190.601	503.249	0.58369	0.0024072	0.00170046	0.00941105
436	Pos	PC(20:1(11Z)/14:0)	160.298	760.584	0.583474	9.05107e-06	6.87245e-06	6.77009e-05
437	Pos	PC(15:0/15:0)	165.87	706.537	0.581572	9.05107e-06	6.87245e-06	6.77009e-05
438	Pos	Italipyrone	128.885	401.159	0.581276	0.0217651	0.0167618	0.000507231
439	Pos	Ethyl acetoacetate	124.446	131.07	0.579999	0.00899373	0.00623518	0.00416122
440	Pos	Enterocin 900	436.168	452.251	0.574323	0.015346	0.0121328	0.00347552
441	Pos	Threoninyl-Serine	459.994	207.097	0.570727	0.0629892	0.044495	0.000696313
442	Pos	PC(18:3(6Z,9Z,12Z)/18:1(11Z))	159.183	782.569	0.570034	9.05107e-06	6.87245e-06	6.77009e-05
443	Pos	Ethyl 2-mercaptopropionate	415.92	135.048	0.569359	0.141661	0.0905239	7.28087e-07
444	Pos	6,10,14-Trimethyl-5,9,13-pentadecatrien-2-one	32.5704	263.237	0.56789	0.0135598	0.00865532	0.00422537
445	Pos	PC(20:2(11Z,14Z)/14:0)	131.131	758.568	0.56637	9.05107e-06	6.87245e-06	6.77009e-05
446	Pos	6-Hydroxyetodolac	401.32	304.162	0.56438	0.0435652	0.0294372	4.26174e-05
447	Pos	Valyl-Histidine	162.232	255.145	0.562787	0.105487	0.0588517	5.86242e-06
448	Pos	Atrovirinone	186.088	457.186	0.561774	0.00307251	0.00197864	0.00205686
449	Pos	Prolylhydroxyproline	431.631	229.118	0.559575	0.0210283	0.0156892	4.24702e-05
450	Pos	2-Hydroxycinnamic acid	311.198	165.054	0.555866	0.430529	0.19999	2.6565e-05
451	Pos	2-Ethoxy-4-(4-methyl-1,3-dioxolan-2-yl)phenol	77.2735	225.112	0.555088	0.00867459	0.00656335	0.00388939
452	Pos	Eicosapentaenoic acid	30.2475	303.232	0.554194	0.00905758	0.00692586	0.00400652
453	Pos	N6-Acetyl-5S-hydroxy-L-lysine	385.596	205.118	0.554184	0.257166	0.176691	4.47962e-05
454	Pos	CPA(18:2(9Z,12Z)/0:0)	473.451	417.246	0.553846	0.00551777	0.00315933	8.85323e-06
455	Pos	Methyldopa	237.739	212.092	0.553089	0.0590186	0.0427311	0.00471204
456	Pos	1,4'-Bipiperidine-1'-carboxylic acid	192.829	213.16	0.552801	0.0108469	0.0080258	0.000741742
457	Pos	N'-Hydroxyneosaxitoxin	289.202	332.134	0.550143	0.028926	0.0212874	1.42603e-05
458	Pos	2,3-Dehydrosilybin	472.769	481.106	0.547709	0.00294859	0.00208229	1.10158e-05
459	Pos	Avocadenofuran	27.3674	249.221	0.5475	0.00189474	0.000757147	0.00849953
460	Pos	L-cis-3-Amino-2-pyrrolidinecarboxylic acid	92.0438	131.082	0.546213	0.017558	0.0129991	0.000503441
461	Pos	N-Acetyldopamine	285.829	196.097	0.546084	0.0395039	0.0285884	1.63271e-05
462	Pos	Myricatomentoside I	186.052	505.206	0.542916	0.00675434	0.00375046	0.00137119
463	Pos	D-Xylulose	150.201	133.05	0.542535	0.0787925	0.0483928	2.20078e-05
464	Pos	3-(3-Methylbutylidene)-1(3H)-isobenzofuranone	405.809	203.103	0.540911	0.0160432	0.0124694	0.000470867
465	Pos	Deoxyribose	93.0665	117.055	0.540802	0.0230164	0.014406	7.47218e-06
466	Pos	Dihydro-4,6-dimethyl-2-(1-methylpropyl)-4H-1,3,5-dithiazine	158.726	206.102	0.540507	2.85673	1.99428	0.000270844
467	Pos	PC(18:3(9Z,12Z,15Z)/14:0)	76.2506	728.531	0.540273	9.05107e-06	6.87245e-06	6.77009e-05
468	Pos	1'-Acetoxyeugenol acetate	128.844	265.107	0.537551	0.00921567	0.00678103	0.00185131
469	Pos	3-Mercapto-3-methyl-1-butanol	365.11	121.069	0.536784	0.038087	0.0236327	5.83394e-05
470	Pos	(Â±)-2-Pentanethiol	449.736	105.074	0.533669	0.0324583	0.0213942	0.00332163
471	Pos	LysoPC(20:3(5Z,8Z,11Z))	331.801	546.365	0.53305	0.0147107	0.00925907	6.41939e-06
472	Pos	Dihydrouracil	64.9919	115.05	0.532832	0.0381993	0.0269462	0.000376272
473	Pos	Aspartyl-Arginine	463.329	290.146	0.528938	0.00169403	0.00104953	0.0059146
474	Pos	Tamarixetin	56.0103	317.065	0.527182	0.00622997	0.00315358	0.000934421
475	Pos	Serylisoleucine	471.247	219.134	0.526372	0.037487	0.0261468	8.60582e-05
476	Pos	3-[(3-Methylbutyl)nitrosoamino]-2-butanone	473.546	187.144	0.524999	0.0365498	0.0250449	7.10279e-05
477	Pos	Mangiferin 6'-gallate	177.1	575.118	0.523566	0.0147039	0.00474969	3.09424e-07
478	Pos	2-Bromo-1H-indole-3-carboxaldehyde	314.12	223.972	0.52315	0.0289557	0.00874503	7.36671e-06
479	Pos	5-Hydroxy-3,3',7,8-tetramethoxy-4',5'-methylenedioxyflavone	300.307	403.112	0.522592	0.0319833	0.0119646	4.22638e-05
480	Pos	2-O-Caffeoyltartronic acid	178.267	283.05	0.522336	0.00357482	0.00269432	0.0116279
481	Pos	Safynol	210.806	201.087	0.517436	0.0209564	0.015361	0.000102815
482	Pos	Panaquinquecol 1	32.6028	293.21	0.516011	0.311182	0.188234	0.00011849
483	Pos	(R)-2-Acetoxy-p-mentha-1,8-diene	96.9042	195.138	0.515375	0.154611	0.0933568	5.4591e-07
484	Pos	Dihydromarasmone	435.057	281.142	0.514655	0.00572901	0.00368288	0.00284625
485	Pos	8,8'-Methylenebiscatechin	301.497	593.177	0.513219	0.00539995	0.00266871	0.00061078
486	Pos	Cyclic AMP	371.606	330.058	0.51137	0.0206898	0.00666823	6.60579e-07
487	Pos	Cis-zeatin	187.389	220.118	0.51055	0.0768805	0.0521601	2.24168e-07
488	Pos	19(20)-EpDPE	355.515	345.25	0.51033	0.0145828	0.00853101	5.18139e-05
489	Pos	(1R)-Hydroxy-(2R)-glutathionyl-1,2-dihydronaphthalene	161.408	452.14	0.510153	0.0324549	0.0148621	0.00295092
490	Pos	Glycine	372.172	76.0398	0.509204	0.114995	0.0460892	2.99882e-08
491	Pos	D-Galactose	150.211	163.06	0.508083	0.06681	0.0410926	4.11328e-05
492	Pos	LysoPC(20:0/0:0)	208.62	552.402	0.501247	9.05107e-06	6.87245e-06	6.77009e-05
493	Pos	Fragransin C1	25.9737	375.183	0.50095	0.00117989	0.000590446	0.000340243
494	Pos	(Z)-N-Feruloyl-5-hydroxyanthranilic acid	453.07	330.093	0.499303	0.00787624	0.00407948	0.000343342
495	Pos	2-Ethylfuran	32.4778	97.0651	0.499133	0.0107385	0.00620966	0.000892931
496	Pos	1-Propenyl propyl sulfide	62.75	117.074	0.495685	0.0823231	0.0469753	3.84953e-07
497	Pos	PC(22:1(13Z)/14:1(9Z))	158.075	786.6	0.495345	9.05107e-06	6.87245e-06	6.77009e-05
498	Pos	3,5-Dichloro-4-hydroxy-2-methoxy-6-methylbenzoic acid	21.0645	250.988	0.494433	0.00371426	0.0027674	0.0039171
499	Pos	beta-Alanyl-L-lysine	440.65	218.15	0.493762	0.0946305	0.0620881	0.000619028
500	Pos	Glycerol trihexanoate	326.025	387.272	0.493079	0.00119411	0.000833013	0.00253241
501	Pos	Myricanone	28.0007	357.173	0.488507	0.00560233	0.0032737	4.89153e-05
502	Pos	4-(2-Aminophenyl)-2,4-dioxobutanoic acid	380.01	208.061	0.487782	0.0131235	0.00926604	0.000144466
503	Pos	Citrulline	400.198	176.103	0.487364	1.25945	0.860411	2.84467e-06
504	Pos	(3b,6b,8a,12a)-8,12-Epoxy-7(11)-eremophilene-6,8,12-trimethoxy-3-ol	91.161	327.216	0.487067	0.0119824	0.00602999	0.000292794
505	Pos	Valyl-Proline	275.648	215.139	0.487048	0.356011	0.196335	0.00334994
506	Pos	desmethylclomipramine	388.961	301.151	0.486554	0.0115954	0.00779744	5.96743e-06
507	Pos	Hesperetin 3',7-O-diglucuronide	218.117	651.192	0.486463	0.0121669	0.00556011	0.000232641
508	Pos	cis-4-Hydroxy-D-proline	64.9989	132.066	0.486286	0.489009	0.32433	2.61756e-05
509	Pos	Histidinyl-Threonine	355.356	257.124	0.483027	0.0312024	0.0181266	5.53017e-05
510	Pos	(2R,3R,4R)-2-Amino-4-hydroxy-3-methylpentanoic acid	285.842	148.097	0.482342	1.44284	0.945031	5.24778e-06
511	Pos	Zymonic acid	172.667	159.028	0.479651	0.162231	0.123686	0.000268936
512	Pos	(7R*,8R*)-3-Methoxy-3',4,7,9,9'-pentahydroxy-8,4'-oxyneolignan 4-xyloside	376.685	497.198	0.477978	0.00604294	0.00331405	1.60483e-05
513	Pos	Calystegine C1	346.33	192.087	0.476058	0.0119129	0.00622601	0.00377963
514	Pos	Tricholomic acid	417.059	161.056	0.474968	0.0114885	0.00863092	0.000209283
515	Pos	5-Deoxykievitol	102.018	357.133	0.474621	0.0105158	0.00655145	1.04374e-05
516	Pos	Sedanonic acid	90.0149	211.133	0.472931	0.445602	0.17703	5.9624e-08
517	Pos	Cichoralexin	57.1434	249.144	0.470382	0.234191	0.132737	2.47305e-06
518	Pos	2-Aminoheptanedioic acid	448.541	176.092	0.46518	0.0198816	0.0148991	4.4412e-05
519	Pos	5-O-Desmethyldonepezil	37.7413	366.209	0.461769	0.00442997	0.0027457	0.0159257
520	Pos	6-(1-Hydroxyethyl)-2,2-dimethyl-2H-1-benzopyran	51.5308	205.118	0.461026	1.01089	0.594171	8.01926e-07
521	Pos	Ergothioneine	403.56	230.102	0.456134	0.0348891	0.0236906	0.000912828
522	Pos	(all-E)-3,5,7-Tridecatriene-9,11-diyn-1-ol	68.4016	187.108	0.455276	0.0921448	0.0661897	0.00173021
523	Pos	N-Carbamoyl-2-amino-2-(4-hydroxyphenyl)acetic acid	409.174	211.071	0.453064	0.0143478	0.00932675	0.000183015
524	Pos	1,3,5-Bisabolatrien-10-one	494.933	219.17	0.451496	0.0749504	0.0467308	8.15678e-05
525	Pos	8-Acetoxypinoresinol 4-glucoside	257.55	579.205	0.450117	0.00189124	0.000527172	0.00024844
526	Pos	Furomammea G	439.559	389.203	0.448555	0.00466285	0.00339503	7.90104e-05
527	Pos	Threoninyl-Proline	339.649	217.118	0.44792	0.218907	0.14969	0.000291737
528	Pos	Ophthalmic acid	395.714	290.135	0.447803	0.0101429	0.0066502	0.000145019
529	Pos	beta-Elemenone	507.469	219.17	0.446348	0.0379589	0.0225597	0.00234386
530	Pos	N-[[3-Hydroxy-2-(2-pentenyl)cyclopentyl]acetyl]isoleucine	95.2306	326.232	0.444286	0.00424468	0.00285754	0.00653941
531	Pos	Ciceritol	107.645	519.186	0.44284	0.00396428	0.00317642	0.00121758
532	Pos	1-(5Z,8Z,11Z,14Z-eicosatetraenoyl)-sn-glycero-3-phosphate	463.237	459.256	0.441813	0.00142611	0.00081099	0.000278489
533	Pos	2-Propenyl phenylacetate	275.794	177.095	0.439784	0.045575	0.0363916	0.000454452
534	Pos	PE(22:4(7Z,10Z,13Z,16Z)/14:1(9Z))	53.6897	738.505	0.43602	9.05107e-06	6.87245e-06	6.77009e-05
535	Pos	Glucosylisomaltol	153.426	289.091	0.435739	0.0283833	0.020249	8.18047e-05
536	Pos	Eremopetasinorone A	128.933	207.138	0.434843	0.516924	0.407295	0.000331359
537	Pos	6-Lactoyltetrahydropterin	456.579	240.108	0.433879	0.0110837	0.00649304	8.36779e-06
538	Pos	8-Acetoxypinoresinol	105.949	417.154	0.433509	0.00643787	0.0036343	3.42147e-07
539	Pos	Tsangane L 3-glucoside	376.65	375.235	0.433448	0.010605	0.00538699	7.23981e-06
540	Pos	Glycyl-Lysine	111.881	204.134	0.432613	0.600987	0.39084	2.08881e-05
541	Pos	Isoeugenol phenylacetate	344.166	283.14	0.429562	0.0032807	0.00211671	2.49972e-06
542	Pos	4-(Glutamylamino) butanoate	429.342	233.113	0.429364	0.0422971	0.0348623	0.00118391
543	Pos	2,3,5,6,8,8a-Hexahydro-2,5,5,8a-tetramethyl-7H-1-benzopyran-7-one	89.6139	209.154	0.426022	0.0643475	0.052418	0.000792719
544	Pos	Piperochromanoic acid	99.5941	357.213	0.426	0.0148509	0.00924049	2.2786e-05
545	Pos	2-(4-Allyl-2,6-dimethoxyphenoxy)-1-(3,4,5-trimethoxyphenyl)-1-propanol	23.5012	419.209	0.425799	0.000581078	0.000357592	8.26318e-05
546	Pos	Aspartyl-Isoleucine	391.205	247.129	0.424516	0.0545673	0.0435093	0.00149261
547	Pos	(3S,7E,9S)-9-Hydroxy-4,7-megastigmadien-3-one 9-glucoside	90.8243	371.206	0.423522	0.0252439	0.02063	0.00443006
548	Pos	Cysteinyl-Asparagine	309.268	236.076	0.422931	0.00221194	0.000601745	2.46404e-05
549	Pos	Norchalciporyl propionate	325.369	260.172	0.421976	0.00360965	0.00215227	1.38641e-05
550	Pos	Distichonic acid A	409.193	295.113	0.420975	0.144928	0.0767057	5.5644e-05
551	Pos	Aminoadipic acid	181.62	162.076	0.419034	0.0544098	0.0328806	6.98618e-05
552	Pos	Agrocybin	218.642	148.043	0.416545	9.05107e-06	6.87245e-06	6.77009e-05
553	Pos	3-Methyl-3H-imidazo[4,5-f]quinoxalin-2-amine	244.48	200.092	0.411763	0.0117796	0.00672166	0.00215284
554	Pos	Austalide K	336.346	413.239	0.410535	0.00285813	0.00111782	0.00036686
555	Pos	2,6-Dimethoxy-4-propylphenol	130.15	197.117	0.406126	0.0180922	0.0133147	0.00262054
556	Pos	Vaccinoside	218.797	537.16	0.404709	0.00924264	0.00548091	3.75126e-06
557	Pos	5-Methyltetrahydrofolic acid	353.366	460.203	0.402867	0.0288682	0.0132288	8.04163e-07
558	Pos	Cibaric acid	94.6156	325.201	0.398187	0.00236369	0.00141666	0.0131377
559	Pos	Danazol	63.8732	340.223	0.397679	0.0736239	0.0489963	0.00375807
560	Pos	D-Alanine	126.718	90.0554	0.396463	0.210613	0.143758	0.00394251
561	Pos	Norpropoxyphene	307.121	326.207	0.395981	0.0500358	0.0222354	2.18779e-06
562	Pos	gamma-L-Glutamyl-L-pipecolic acid	288.924	259.129	0.394584	0.0125275	0.00853506	8.79795e-05
563	Pos	Graveoline	394.56	280.092	0.392734	0.01501	0.0104368	0.00896624
564	Pos	DHAP(18:0)	115.161	437.275	0.392243	0.00830841	0.00465241	0.000268234
565	Pos	Glutaminylvaline	127.828	246.145	0.390825	0.111514	0.0763483	8.3953e-05
566	Pos	Roquefortine	506.472	390.187	0.388546	0.00103965	0.000550292	8.99077e-06
567	Pos	Isotrichodermin	128.993	293.171	0.387355	0.014495	0.0088409	0.000409663
568	Pos	Glutamylglutamic acid	475.855	277.103	0.387158	0.0550139	0.0406891	7.81367e-05
569	Pos	Betonicine	60.5301	160.097	0.386868	0.213722	0.153097	0.000100228
570	Pos	Octadecanedioic acid	149.266	315.253	0.386152	0.0920665	0.0549032	7.93177e-06
571	Pos	N-Methylschinifoline	203.018	256.133	0.386034	0.0198589	0.013983	0.00129351
572	Pos	4',5,7-Trihydroxy-3'-prenylflavanone	69.5182	341.138	0.385675	0.00753495	0.00508442	0.000281065
573	Pos	Gravacridonetriol	428.35	358.134	0.384948	0.0105685	0.00650773	1.14633e-05
574	Pos	Cucurbic acid	97.536	213.148	0.384099	0.0440471	0.0276739	2.20798e-05
575	Pos	Citrusin E	166.553	373.149	0.382642	0.00573038	0.00324391	0.0027717
576	Pos	Cysteinyl-Glutamine	468.187	250.092	0.380153	0.00715461	0.0049704	0.00571012
577	Pos	Isoswertiajaponin	301.361	463.134	0.379262	0.0190461	0.00645204	2.78248e-05
578	Pos	3,3'-Thiobispropanoic acid	178.635	179.04	0.378579	0.0224116	0.0144252	0.000218742
579	Pos	N-Acetylasparagine	415.887	175.071	0.376601	0.11333	0.0776722	2.10607e-07
580	Pos	Lysyl-Aspartate	149.447	262.14	0.375536	0.0849494	0.0458172	1.58953e-06
581	Pos	4-Hydroxybenzyl isothiocyanate 4''-acetylrhamnoside	296.572	354.107	0.371077	0.012222	0.00439552	0.000289774
582	Pos	Abscisic acid	368.804	265.139	0.370029	0.0262607	0.0148752	8.76535e-05
583	Pos	Methyl 2,3-dihydro-3,5-dihydroxy-2-oxo-3-indoleacetic acid	371.046	238.071	0.368177	0.0314301	0.0176812	3.15248e-07
584	Pos	S-Acetyldihydrolipoamide-E	447.711	250.092	0.367621	0.00977321	0.00721129	0.00350274
585	Pos	Thromboxane B2	249.506	393.222	0.365724	0.00722189	0.00372619	0.00154991
586	Pos	Euglobal Ia1	109.55	387.224	0.364442	0.0112821	0.00503982	6.56183e-05
587	Pos	8(R)-Hydroperoxylinoleic acid	151.324	313.237	0.364422	0.04409	0.0215565	0.00777684
588	Pos	2-Oxovaleric acid	301.908	117.055	0.364082	0.00609225	0.00432067	0.0010947
589	Pos	Sphinganine	115.469	302.305	0.361613	0.053895	0.00370536	0.000273413
590	Pos	Piperundecalidine	283.534	368.229	0.360994	0.0310328	0.0197761	0.000485716
591	Pos	Guanosine	290.391	284.099	0.360752	0.019534	0.0133364	7.94707e-05
592	Pos	(2E,8E)-Piperamide-C9:2	131.333	328.187	0.35943	0.0436614	0.0259193	6.53415e-06
593	Pos	1-Methoxyphaseollidin	62.6286	355.154	0.358062	0.0059503	0.00450742	0.00617674
594	Pos	alpha-Rhamnorobin	192.794	433.112	0.354283	0.0209597	0.0103734	4.07748e-05
595	Pos	Kanzonol F	133.421	421.208	0.354251	0.012908	0.00813866	2.73357e-05
596	Pos	AS 1-5	62.7403	716.566	0.354156	9.05107e-06	6.87245e-06	6.77009e-05
597	Pos	2-Butylbenzothiazole	369.921	192.087	0.353946	0.0172752	0.0127051	0.0059807
598	Pos	Norverapamil	90.0094	441.271	0.35367	0.00591476	0.00393102	0.00435002
599	Pos	Culinariside	122.193	802.638	0.350731	9.05107e-06	6.87245e-06	6.77009e-05
600	Pos	Corchorifatty acid A	91.1583	309.206	0.349764	0.0281345	0.0138195	5.22232e-08
601	Pos	Glechomafuran	388.961	231.145	0.349188	0.00404367	0.00216216	4.24449e-06
602	Pos	Methyl dihydrojasmonate	94.9903	227.164	0.347869	0.0108167	0.00591978	0.00062046
603	Pos	(2S,4R,5S)-Muscarine	348.644	174.149	0.346861	0.0142402	0.0100432	0.000825186
604	Pos	2-[4-(3-Hydroxypropyl)-2-methoxyphenoxy]-1,3-propanediol	208.738	257.138	0.345601	0.00678388	0.00475332	6.49788e-05
605	Pos	Juzirine	397.943	282.118	0.342153	0.0149128	0.0110303	0.0103922
606	Pos	L,L-Cyclo(leucylprolyl)	94.1909	233.128	0.341611	0.29542	0.188101	5.73635e-06
607	Pos	PC(24:1(15Z)/14:0)	119.778	816.654	0.337519	9.05107e-06	6.87245e-06	6.77009e-05
608	Pos	Palmitic acid	122.193	274.274	0.336682	0.00286544	0.000977679	0.000181567
609	Pos	N-Acetyl-a-neuraminic acid	428.238	310.113	0.33438	9.05107e-06	6.87245e-06	6.77009e-05
610	Pos	(Â±)-2,2'-Iminobispropanoic acid	50.5445	162.076	0.333419	0.0613054	0.0464238	0.00293662
611	Pos	Picrotin	187.024	311.112	0.333398	0.005573	0.0034085	1.28223e-05
612	Pos	Phenethylamine glucuronide	133.491	298.132	0.333113	0.0169999	0.0107419	3.80295e-05
613	Pos	z-Clausenamide	218.642	280.139	0.331659	0.0173736	0.0128945	0.00616995
614	Pos	Nicotine imine	270.2	161.107	0.330249	0.0569407	0.0169645	1.55549e-05
615	Pos	L-Coprine	336.275	203.103	0.329993	0.010142	0.0077782	0.00309499
616	Pos	Luteolin 7-sulfate	43.7025	367.011	0.329913	0.045237	0.00976642	0.000854246
617	Pos	N-Acetyl-b-glucosaminylamine	88.8625	221.113	0.327947	0.300605	0.190083	6.89098e-05
618	Pos	Threoninyl-Isoleucine	481.892	233.15	0.327581	0.0272258	0.0181196	7.6256e-05
619	Pos	Marmesin rhamnoside	82.8755	393.151	0.327297	0.0453186	0.0354139	0.00207693
620	Pos	Fructosamine	90.0094	180.086	0.327177	0.123361	0.0299724	3.08086e-06
621	Pos	Encelin	428.268	245.113	0.326074	0.511191	0.372606	7.00497e-05
622	Pos	Palmitoleoyl Ethanolamide	141.12	298.274	0.32555	0.0145277	0.00447603	4.88144e-06
623	Pos	Tetrahydroharmol	193.369	203.118	0.322116	1.04977	0.718011	3.72247e-06
624	Pos	Kelampayoside A	156.941	479.187	0.321914	0.00279948	0.00166671	5.0142e-05
625	Pos	5-(3E-Pentenyl)tetrahydro-2-oxo-3-furancarboxylic acid	308.829	199.101	0.320577	0.0336296	0.0204315	0.0035276
626	Pos	Marmeline	244.336	352.186	0.320212	0.0117203	0.00694533	7.13763e-06
627	Pos	Ganoderic acid theta	249.382	531.292	0.320079	0.00318448	0.00125213	0.000432357
628	Pos	Miltirone	97.8907	283.176	0.319462	0.0747655	0.0466193	0.00107835
629	Pos	1,7-Dimethylguanosine	414.799	312.129	0.319247	0.00762186	0.00514109	0.000931068
630	Pos	Resolvin D2	106.209	359.229	0.318118	0.0162773	0.0099872	2.27986e-05
631	Pos	Nepetaside	114.01	347.171	0.316286	0.010012	0.00599537	0.00229496
632	Pos	4-tert-Butylphenyl salicylate	165.697	271.14	0.315923	0.0373078	0.0185785	4.78301e-06
633	Pos	5-De-O-methyltoddanol	409.193	277.103	0.312868	0.0430145	0.0265126	0.000179086
634	Pos	Alanyl-Proline	158.181	187.108	0.311781	0.142136	0.0923828	0.000192865
635	Pos	2-Heptylbenzothiazole	94.5616	234.132	0.311576	0.0321674	0.0193007	5.02423e-07
636	Pos	2-Phenylethyl benzoate	395.709	227.103	0.309011	0.0137653	0.00835931	3.98781e-06
637	Pos	CPA(18:0/0:0)	226.09	421.281	0.306724	0.000724896	0.000177055	0.00405726
638	Pos	1-(9Z-hexadecenoyl)-glycero-3-phosphate	310.469	409.244	0.306526	0.0058523	0.00165875	5.30398e-10
639	Pos	Isoleucyl-Hydroxyproline	59.3855	245.149	0.305367	0.383842	0.23025	5.21587e-06
640	Pos	Tromethamine	305.246	122.081	0.301137	0.0166187	0.0119912	0.0137391
641	Pos	2-Methoxy-3-(1-methylpropyl)pyrazine	96.436	167.118	0.300571	0.0317548	0.0172339	1.58362e-05
642	Neg	Glycine	372.47	74.0237	1	3.20397	1.10067	4.69811e-06
643	Neg	2,6-diaminohexanoic acid	527.172	145.097	0.999888	4.38244	3.19299	0.000254011
644	Neg	L-Norleucine	278.693	130.086	0.999624	49.2352	37.9034	0.00212561
645	Neg	Quinic acid	344.841	191.055	0.999194	37.4108	31.9416	0.0265124
646	Neg	Succinic acid	400.166	117.018	0.998467	111.605	97.2268	0.0426793
647	Neg	L-Lysine	551.22	145.097	0.996244	1.48865	1.10202	0.0228626
648	Neg	L-Malic acid	419.24	133.013	0.99588	13.6	10.8388	0.0390232
649	Neg	Leucinic acid	145.655	131.07	0.995689	545.831	415.364	0.000362206
650	Neg	D-Aspartic acid	417.002	132.029	0.99566	41.6244	30.0221	0.00117555
651	Neg	D-Alanine	395.684	88.0394	0.995454	2.16478	1.22357	2.99574e-05
652	Neg	D-Glutamine	382.87	145.061	0.994142	4.50913	0.158212	2.12513e-05
653	Neg	3,4-Dihydroxybenzaldehyde	323.087	137.023	0.990345	0.556417	0.475946	0.00682862
654	Neg	D-Proline	392.289	114.055	0.984569	2.06579	1.55568	0.000288843
655	Neg	Ethyl dodecanoate	394.551	227.201	0.982789	0.140562	0.103565	0.0141056
656	Neg	3-Hydroxybenzoic acid	236.934	137.023	0.982411	1.26024	0.672065	6.42404e-05
657	Neg	7-Methylguanine	164.71	164.064	0.98109	0.706098	0.544167	0.00197003
658	Neg	Uric acid	340.852	167.02	0.977377	0.692307	0.511066	0.0219572
659	Neg	Pyroglutamic acid	371.578	128.034	0.976396	2.65473	1.9516	0.0276498
660	Neg	L-Iditol	297.942	181.071	0.965536	467.682	364.521	0.00387651
661	Neg	2-Hydroxyethanesulfonate	170.068	124.99	0.965376	3.41508	2.89234	0.0151789
662	Neg	N-Butyrylglycine	363.179	144.066	0.965226	45.1472	33.652	0.000493277
663	Neg	L-Phenylalanine	268.461	164.071	0.962007	44.9421	26.6428	2.09324e-05
664	Neg	2-Hydroxystearic acid	39.3604	299.259	0.950259	0.0408088	0.0105789	0.000432509
665	Neg	gamma-Glutamylmethionine	381.29	277.086	0.950122	0.0266307	0.0158198	0.0390535
666	Neg	Luteolin	104.242	285.041	0.944207	1.24032	0.713686	0.000102208
667	Neg	D-Ornithine	513.231	131.082	0.942997	2.24586	1.69608	0.0082967
668	Neg	Astragalin	233.31	447.094	0.941493	0.12869	0.0644818	0.00106491
669	Neg	D-Glucuronic acid	452.51	193.035	0.94075	1.19448	0.651298	0.00447917
670	Neg	N2-gamma-Glutamylglutamine	443.958	274.105	0.938745	0.47295	0.348618	0.00208968
671	Neg	2-Hydroxybutyric acid	206.599	103.039	0.934261	1.47453	1.10998	0.00336184
672	Neg	Aesculin	223.02	339.072	0.933457	0.0206713	0.0124262	0.00645628
673	Neg	L-Valine	340.772	116.071	0.932143	1.05115	0.727772	0.00167163
674	Neg	L-Targinine	509.249	187.119	0.931845	0.108602	0.0815846	0.0153869
675	Neg	3,3',4'5-Tetrahydroxystilbene	57.1005	243.066	0.930855	0.616428	0.363349	0.000506671
676	Neg	Indolelactic acid	177.948	204.066	0.928677	40.4605	25.9909	0.000176983
677	Neg	L-Asparagine	386.169	131.045	0.915913	42.4977	30.1549	0.00111729
678	Neg	D-Xylitol	220.248	151.06	0.898273	4.04661	3.21273	0.0083263
679	Neg	Aldehydo-D-xylose	150.612	149.045	0.888558	3.20793	2.49628	0.00294699
680	Neg	5,7-dihydroxy-2-(4-hydroxy-3-methoxyphenyl)-3-{[3,4,5-trihydroxy-6-(hydroxymethyl)oxan-2-yl]oxy}-4H-chromen-4-one	185.708	477.104	0.882404	0.0490068	0.0324792	0.00077847
681	Neg	(-)-Epigallocatechin	38.5611	305.069	0.879335	1.46918	1.0147	0.00559123
682	Neg	Galactose 1-phosphate	492.522	259.023	0.87413	0.0465255	0.0351106	0.000184007
683	Neg	3-Hydroxycapric acid	101.842	187.133	0.866627	39.6011	29.2663	0.000311565
684	Neg	N-Acetyl-glucosamine 1-phosphate	457.526	300.049	0.863287	0.00780147	0.00396348	0.0354342
685	Neg	2-Keto-3-deoxy-D-gluconic acid	270.451	177.04	0.841146	1.88647	1.48054	0.0335484
686	Neg	3-Isopropylmalate	377.252	175.06	0.833716	24.4506	17.0003	0.00475866
687	Neg	Mesaconic acid	408.009	129.018	0.830725	4.74363	3.26571	0.00210689
688	Neg	Deoxyadenosine	413.511	250.058	0.829291	0.108403	0.0814137	0.00741681
689	Neg	gamma-Aminobutyric acid	418.762	102.055	0.815329	1.78289	1.09864	0.0153009
690	Neg	Morin	235.634	301.035	0.786857	0.457556	0.254824	0.00245519
691	Neg	Quinolinic acid	35.1853	166.014	0.782103	1.99618	1.48546	0.000597223
692	Neg	2,3,4,5-Tetrahydropiperidine-2-carboxylate	364.006	126.055	0.779247	0.129204	0.0993409	0.0189187
693	Neg	N-Acetylserine	305.91	146.045	0.778064	18.4019	14.326	0.0022756
694	Neg	1,5-Dicaffeoylquinic acid	208.298	515.12	0.775741	0.0782113	0.0452147	0.00413009
695	Neg	L-Histidine	395.743	154.061	0.772537	1.75279	1.0299	0.0046601
696	Neg	2-Methylbenzoic acid	215.663	135.044	0.769559	5.37863	4.18823	0.00685067
697	Neg	3-Hydroxybutyric acid	408.002	103.039	0.75411	0.996907	0.78526	0.0289171
698	Neg	Vanillic acid	104.582	167.034	0.753194	2.76346	1.89679	0.0203604
699	Neg	3-(3,4-Dihydroxy-5-methoxy)-2-propenoic acid	93.6594	209.045	0.751454	0.640343	0.492353	0.0282276
700	Neg	Succinylacetone	70.1508	157.05	0.74723	75.7219	62.1471	0.00936833
701	Neg	Cyanidin 3-glucoside	419.247	447.1	0.710353	0.0784429	0.0572874	0.00217972
702	Neg	(+)-Gallocatechin	461.133	305.067	0.705445	0.0623643	0.0370318	0.0401453
703	Neg	Thioguanine	190.234	166.017	0.704279	1.0243	0.895986	0.0443324
704	Neg	Nobiletin	449.377	401.13	0.694169	0.148879	0.113576	0.0439229
705	Neg	Nicotinic acid	242.596	122.024	0.693245	1.18038	0.96914	0.00776444
706	Neg	3-Methyladipic acid	328.874	159.065	0.69108	68.1172	50.8616	0.000919412
707	Neg	Taurine	230.619	124.006	0.69078	0.603882	0.214543	2.75369e-05
708	Neg	3,5,7-trihydroxy-2-(4-hydroxyphenyl)-3,4-dihydro-2H-1-benzopyran-4-one	37.4046	287.056	0.676387	3.92176	2.63979	0.00150403
709	Neg	Demethoxycurcumin	430.573	337.114	0.672646	0.0405151	0.029287	0.0106845
710	Neg	N,N'-diacetylchitobiose	109.236	423.17	0.670891	0.374759	0.266712	0.000847185
711	Neg	Phlorizin	160.091	435.13	0.645735	0.500865	0.36138	0.00471921
712	Neg	Liquiritin apioside	501.691	531.157	0.612343	0.0160417	0.00946411	0.0185118
713	Neg	Cis-zeatin	279.861	254.08	0.571668	0.168229	0.100652	0.000210433
714	Neg	3,4,5-Trimethoxycinnamic acid	185.869	237.077	0.552578	3.37878	2.32845	1.54665e-05
715	Neg	S-Nitrosoglutathione	414.381	335.075	0.552354	0.0624027	0.0449722	0.00367607
716	Neg	N-methylvaline	228.224	130.086	0.552259	0.230558	0.157439	0.0190389
717	Neg	Abscisic acid	103.135	263.129	0.551626	19.7089	14.8345	0.000420148
718	Neg	3-Nitrotyrosine	36.9282	225.049	0.548681	3.73532	2.51796	0.000206865
719	Neg	3-O-p-Coumaroylquinic acid	206.621	337.093	0.531994	2.05108	1.47678	0.000280618
720	Neg	1-Aminocyclopropanecarboxylic acid	351.99	100.039	0.50536	3.5331	2.43739	0.000156477
721	Neg	Genipin	166.016	225.077	0.50358	5.24394	3.77225	0.00109024
722	Neg	Stachyose	508.959	665.216	0.482222	0.0205526	0.0129027	0.00646094
723	Neg	Xanthohumol	153.869	353.146	0.473868	11.2646	4.37886	0.0122391
724	Neg	Estriol	205.211	287.161	0.47018	0.248984	0.187491	0.0462118
725	Neg	N-Acetylvaline	237.358	158.081	0.449893	0.479134	0.406385	0.0101705
726	Neg	Thymine	72.7177	125.035	0.439116	5.97426	4.80288	0.0224992
727	Neg	Orotidylic acid	31.5197	367.013	0.436491	17.8096	12.2163	0.00230449
728	Neg	7-hydroxy-2-(3-hydroxyphenyl)-4H-chromen-4-one	419.247	253.056	0.412282	4.98023	3.74098	0.00335779
729	Neg	Vicenin 2	270.158	593.152	0.408586	0.197902	0.0537407	1.91886e-06
730	Neg	Daidzin	128.076	461.109	0.388062	0.0208935	0.00393591	0.00989774
731	Neg	Caffeine	326.543	193.071	0.361012	1.61343	1.34184	0.0226166
732	Neg	Flumioxazin	127.529	353.101	0.329681	0.697399	0.404782	0.000331473
733	Neg	2-benzoylbenzene-1,3,5-triol	196.034	229.048	0.328219	0.206918	0.160058	0.00986938
734	Neg	Aspartame	359.23	293.114	0.310907	0.0715056	0.048289	0.00389576
735	Neg	(2R,3S)-Piscidic acid	75.3335	255.051	0.303914	0.381896	0.286527	0.0184787
736	Neg	Glycolic acid	71.1594	75.0077	0.999997	1.23348	1.82243	0.00385529
737	Neg	2,3-Dihydroxybutanedioic acid	431.339	149.008	0.997327	1.15753	6.06847	0.000794762
738	Neg	4-Methylcatechol	127.968	123.044	0.992308	2.31935	3.69788	0.00221321
739	Neg	Biorobin	254.49	593.152	0.991326	0.28137	0.382156	0.00756643
740	Neg	Aesculetin	220.249	177.019	0.987741	1.02816	1.69547	0.00932184
741	Neg	Jasmonic acid	92.3363	209.118	0.981959	0.100333	0.510065	0.00737706
742	Neg	Isocitric acid	269.35	191.019	0.965688	10.4781	49.4304	2.28546e-07
743	Neg	D-Xylulose	263.742	149.045	0.95683	0.612426	6.78021	8.02429e-06
744	Neg	(E)-3-(4-Hydroxyphenyl)-2-propenal	127.681	147.044	0.935338	30.3921	44.0751	0.000465508
745	Neg	Phenyllactic acid	127.949	165.055	0.931244	400.936	542.616	0.000979725
746	Neg	1-Kestose	430.449	503.162	0.912368	0.0208452	0.385422	0.0180932
747	Neg	3-Methylcrotonylglycine	254.824	156.066	0.901066	1.63475	3.54589	0.000666013
748	Neg	1,3,5-Trihydroxybenzene	54.1822	125.023	0.894427	5.51592	11.1809	1.77377e-05
749	Neg	Acetylglycine	97.9726	116.034	0.885279	0.0316898	0.283899	0.000368166
750	Neg	Sucrose	374.786	341.109	0.880795	0.145656	227.327	1.17079e-05
751	Neg	Ascochitine	30.0783	275.095	0.849454	1.8194	2.70635	0.00794924
752	Neg	D-Mannose	300.384	179.055	0.848174	4.83177	59.9417	0.00946134
753	Neg	Shikimic acid	254.017	173.045	0.839843	0.128722	0.483771	3.58965e-08
754	Neg	Chorismate	82.0182	225.044	0.834754	0.538444	0.977736	0.000361468
755	Neg	L-Arginine	520.247	173.104	0.832102	0.00146086	0.0444951	0.00355855
756	Neg	Bergapten	287.619	215.032	0.778457	0.515914	2.67896	0.000604121
757	Neg	Inosine	402.417	267.072	0.738755	0.0591957	0.118455	0.00187528
758	Neg	Melezitose	487.805	503.163	0.721059	0.00657868	0.0146245	0.00162553
759	Neg	Methylgingerol	88.9322	307.192	0.707724	0.00593527	0.0247582	0.014513
760	Neg	Licochalcone A	141.971	337.151	0.654317	0.371245	0.565253	0.00521546
761	Neg	4,5-Di-O-caffeoylquinic acid	381.904	515.126	0.642928	0.0166392	0.0771682	0.0030341
762	Neg	Dide-O-methylsimmondsin	268.513	344.135	0.618715	0.071703	11.1891	1.19164e-05
763	Neg	Hexamethylquercetagetin	374.857	401.13	0.612265	0.0914205	64.4095	5.40214e-06
764	Neg	trans-Ferulic acid	173.258	193.05	0.586082	0.245245	0.370362	0.000143956
765	Neg	4-Hydroxystyrene	127.336	119.049	0.557472	24.4697	36.5347	0.00055552
766	Neg	3'-Sialyllactose	373	632.205	0.541074	0.0105123	0.376545	5.47435e-05
767	Neg	Galacturonic acid	295.661	193.035	0.487622	0.159958	0.554265	0.0141327
768	Neg	AICAR	315.281	337.055	0.432443	0.099926	0.343299	0.0259262
769	Neg	Violanone	336.131	315.094	0.376179	0.047507	0.123239	6.90922e-05
770	Neg	Vestitone	127.513	285.065	0.372823	0.000247718	1.87209	0.000223433
771	Neg	1-Octen-3-yl primeveroside	289.48	467.225	0.35672	0.000247718	0.0367158	1.27141e-05
772	Neg	Deoxyinosine	339.922	251.077	0.321333	0.0674675	0.19025	0.000757075
773	Neg	Isopentenyl pyrophosphate	404.639	244.997	0.304787	0.00971514	0.120486	1.29811e-05
Mass error: the scoring of the secondary match and takes the value [0, 1], closer to 1 means higher accuracy.

## Sheet: J vs P
Number	Analysis mode	Compound name	RT(min)	m/z	Mass error	Relative content		P-value
						J	P
1	Pos	1-Pyrroline	53.7662	70.0653	1	7.17978e-06	0.00909113	2.99564e-05
2	Pos	Phosphoric acid	281.359	98.9845	0.999981	0.0104326	0.0625634	2.83364e-07
3	Pos	L-Valine	281.36	118.086	0.999802	4.92684	10.7565	3.22779e-08
4	Pos	Pyrrolidonecarboxylic acid	409.169	130.05	0.998922	0.232848	0.472791	1.68069e-06
5	Pos	2-Hydroxypyridine	48.1676	96.0447	0.998863	0.0573819	0.145199	2.31666e-07
6	Pos	L-Lysine	525.512	147.113	0.998828	0.287206	2.33913	4.58584e-06
7	Pos	Oxolan-3-one	196.131	87.0444	0.998283	0.14903	3.74646	1.27498e-05
8	Pos	Niacinamide	57.1309	123.055	0.997999	0.0140785	0.0607417	4.22889e-06
9	Pos	L-Norleucine	331.796	132.102	0.997995	0.179444	0.485726	6.04242e-07
10	Pos	Epsilon-caprolactam	45.9178	114.091	0.997964	0.00875582	0.0256701	6.79534e-07
11	Pos	Tyramine	229.89	138.091	0.997077	5.48689	9.66528	1.11555e-05
12	Pos	Neotrehalose	385.595	365.105	0.99662	0.0997111	0.162323	0.000149425
13	Pos	Ornithine	507.617	133.097	0.996556	0.0596826	1.33388	0.000110137
14	Pos	Acetylcholine	196.232	146.117	0.996119	3.3068	50.8109	1.44138e-05
15	Pos	1-Methylpyrrole	182.94	82.0656	0.994828	0.00886909	0.0577336	0.0287992
16	Pos	1-Deoxynojirimycin	84.3392	164.092	0.993934	0.0704122	0.784044	1.25637e-05
17	Pos	(-)-Aspidospermine	149.536	355.245	0.99367	0.0130277	0.0572949	1.43849e-09
18	Pos	Norvaline	38.3577	118.086	0.992884	0.0805244	7.76084	1.01187e-05
19	Pos	Maltitol	392.325	367.121	0.991305	0.00477873	0.160038	3.93842e-05
20	Pos	Arabinosylhypoxanthine	237.496	269.088	0.990779	0.000971405	0.00966956	3.00856e-11
21	Pos	L-Glutamic acid	409.193	148.06	0.989493	0.815586	3.36787	9.7339e-06
22	Pos	trans-3,3',4',5,5',7-Hexahydroxyflavanone	273.524	321.058	0.985665	0.00352516	0.032955	5.9821e-08
23	Pos	Acetylhydrazine	311.249	75.0558	0.985304	0.00224085	0.0111232	3.06556e-07
24	Pos	Litebamine	225.421	340.163	0.984895	3.31875e-05	0.0063096	0.00451224
25	Pos	Methylpyrazine	177.687	95.0607	0.983244	0.0305233	0.0731259	2.77299e-06
26	Pos	Romucosine D	238.879	370.174	0.980071	7.17978e-06	0.00242344	0.00259372
27	Pos	(2R)-2-Hydroxy-2-methylbutanenitrile	54.882	100.076	0.978733	0.0305352	0.0900063	9.29929e-07
28	Pos	Kynurenic acid	199.503	190.05	0.977244	7.17978e-06	0.00329198	0.00732903
29	Pos	Riboflavin	227.139	377.146	0.975893	9.12258e-05	0.0076935	4.48849e-05
30	Pos	2-Methylbutylamine	207.343	88.1125	0.975216	0.0538313	0.157455	3.55471e-08
31	Pos	Pi-Methylimidazoleacetic acid	83.1963	141.066	0.974338	0.668828	4.76805	2.39744e-05
32	Pos	Tetramethylpyrazine	214.155	137.107	0.973282	7.17978e-06	0.00776202	1.49192e-05
33	Pos	2-Isopropyl-3-methoxypyrazine	245.085	153.102	0.972719	0.00724428	0.0201829	1.32352e-07
34	Pos	Pipecolic acid	525.6	130.086	0.97268	0.104872	0.815977	1.45489e-05
35	Pos	1-Nitro-7-glutathionyl-8-hydroxy-7,8-dihydronaphthalene	461.068	497.148	0.972569	0.00141126	0.00331229	5.15871e-05
36	Pos	Harmalan	101.495	185.107	0.971172	0.0236957	0.182622	1.52083e-05
37	Pos	Sojagol	388.967	337.11	0.970828	0.00297556	0.00650179	0.000222268
38	Pos	5'-Deoxy-5-fluorouridine	217.529	247.078	0.970489	0.00212506	0.162028	5.11231e-05
39	Pos	Metenamine	297.649	141.113	0.966026	0.125035	0.16247	6.65776e-05
40	Pos	Pyridoxine	88.7587	170.081	0.964394	0.597555	1.74399	1.69926e-07
41	Pos	L-Targinine	506.469	189.134	0.962187	0.762176	1.49171	1.8265e-05
42	Pos	Methyl 3,4-dihydroxy-5-prenylbenzoate 3-glucoside	354.248	399.164	0.958249	7.17978e-06	0.00184559	0.000213629
43	Pos	(+)-2,3-Dihydro-3-methyl-1H-pyrrole	525.637	84.0812	0.956834	0.0289604	0.220663	1.56025e-08
44	Pos	Asymmetric dimethylarginine	506.389	203.15	0.956661	0.382874	0.754055	0.000338027
45	Pos	L-Proline	225.483	116.071	0.95543	0.05119	0.188213	0.000350466
46	Pos	2-Isopropylphenyl methylcarbamate	336.407	194.118	0.944366	0.263681	0.342073	0.00390978
47	Pos	5-(3-Pyridyl)-2-hydroxytetrahydrofuran	89.9363	166.086	0.944084	0.00725753	0.0328877	3.79907e-06
48	Pos	Harmalol	185.946	201.102	0.942456	0.00375365	0.0262931	1.9366e-08
49	Pos	L-Theanine	52.6724	175.107	0.940627	0.0128269	1.30647	9.25959e-06
50	Pos	2-Methoxy-4-vinylphenol	220.611	151.075	0.940548	0.0040941	0.0454606	1.97039e-05
51	Pos	Lactose 6-phosphate	285.219	423.09	0.940371	0.0025357	0.00868491	0.000154933
52	Pos	Leucyl-Tyrosine	226.006	295.165	0.938838	0.0114152	0.0907129	3.77695e-05
53	Pos	Citreoviridinol A1	332.087	421.185	0.938549	0.000139661	0.00282747	0.00168946
54	Pos	Pyridoxamine	250.254	169.097	0.935425	0.0306511	0.102728	2.16155e-08
55	Pos	Formylfusarochromanone	420.435	321.144	0.93416	7.17978e-06	0.0165718	6.09014e-05
56	Pos	Aflatoxin P1	97.5515	299.055	0.930684	0.000105878	0.0403297	6.95323e-06
57	Pos	1-Pyrroline-2-carboxylic acid	65.0056	114.055	0.927287	0.00977152	0.0209051	3.14291e-05
58	Pos	Lysyl-Tyrosine	239.8	310.174	0.926468	0.000942917	0.00452182	0.000372672
59	Pos	3,6-Ditigloyloxytropan-7-ol	222.108	338.207	0.919349	2.79834e-05	0.00808561	0.00127209
60	Pos	2-[4-(3-Hydroxypropyl)-2-methoxyphenoxy]-1,3-propanediol 1-xyloside	223.24	389.178	0.916793	0.002616	0.00484026	0.000235546
61	Pos	Alpha-dimorphecolic acid	149.449	279.231	0.915519	0.0453555	0.294769	5.1423e-08
62	Pos	Kojibiose	374.4	325.113	0.915152	0.0181892	0.187637	8.7296e-06
63	Pos	Dimethylethanolamine	257.9	90.0918	0.913938	0.00977822	0.0710439	1.4959e-08
64	Pos	Leucyl-Isoleucine	200.619	245.186	0.912596	0.28532	0.491733	0.000175935
65	Pos	Citreorosein	43.7042	287.055	0.911811	0.0150399	0.119854	4.59142e-05
66	Pos	O-Acetylethanolamine	39.705	104.071	0.911101	0.507621	2.01075	4.8823e-05
67	Pos	6''-O-Acetyldaidzin	323.223	459.141	0.90895	2.26103e-05	0.00070005	7.69561e-07
68	Pos	Allyl crotonate	184.966	127.073	0.906686	0.00978783	0.015476	0.000453464
69	Pos	Calystegine B2	305.533	176.092	0.905161	0.272648	0.542233	6.48148e-07
70	Pos	Phenylalanyl-Arginine	325.238	322.187	0.903473	0.000124658	0.00177513	1.99207e-06
71	Pos	7-(Methylthio)heptanenitrile	114.281	158.096	0.902709	0.00688731	15.272	9.89755e-06
72	Pos	Tangeritin	302.394	395.121	0.89948	0.00151445	0.00646513	8.51622e-05
73	Pos	N-Lactoyl ethanolamine	170.094	134.081	0.899383	0.00771276	0.0419084	1.99972e-08
74	Pos	Norbixin	344.167	381.213	0.898936	0.00209364	0.00544452	7.0315e-07
75	Pos	Dimethyl fumarate	115.799	145.049	0.895056	0.0562643	0.504941	6.12731e-10
76	Pos	4-Deacetylneosolaniol	340.773	341.159	0.893932	2.65845e-05	0.00190757	2.39137e-06
77	Pos	Valyl-Phenylalanine	200.619	265.154	0.893446	0.0161142	0.252055	7.26131e-06
78	Pos	Theogallin	364.374	345.079	0.889744	0.020067	0.0925143	6.1152e-11
79	Pos	4-Ethyl-5-methyl-2-(1-methylethyl)thiazole	114.281	170.096	0.887815	0.014969	13.0554	7.03018e-06
80	Pos	Serotonin	122.174	177.102	0.883963	0.0237678	0.108665	3.05502e-05
81	Pos	2-Furanmethanol	372.744	99.05	0.883525	0.00754052	0.0942065	1.48094e-06
82	Pos	1,2,5,6-Tetrahydro-4H-pyrrolo[3,2,1-ij]quinolin-4-one	193.014	174.091	0.878841	0.00998779	0.353167	3.31447e-06
83	Pos	Isoleucyl-Phenylalanine	189.447	279.17	0.878231	0.0197687	0.59639	2.03531e-06
84	Pos	Prolyl-Valine	298.454	215.139	0.87822	0.0425809	0.379893	7.90551e-09
85	Pos	Prolyl-Methionine	290.394	247.111	0.872839	7.23716e-05	0.008339	1.10108e-05
86	Pos	(6E)-Piperamide-C7:1	191.756	302.171	0.871804	7.17978e-06	0.00539605	7.51596e-05
87	Pos	Phenylalanyl-Glycine	247.843	223.107	0.866305	0.0106327	0.037313	0.0002082
88	Pos	Dihydromorelloflavone	158.061	559.123	0.863593	4.02202e-05	0.000851577	0.00398757
89	Pos	5,7-dihydroxy-2-(3,4,5-trihydroxyphenyl)-3,4-dihydro-2H-1-benzopyran-4-one	177.932	305.065	0.862941	0.00208457	0.0186576	0.0127066
90	Pos	(+)-12a-Hydroxypachyrrhizone	104.273	383.076	0.859434	0.00046871	0.00462275	0.000877627
91	Pos	4'-Hydroxyflurbiprofen	211.847	261.094	0.852784	0.0008325	0.428215	3.13489e-05
92	Pos	N-[2-(4-Prenyloxyphenyl)ethyl]tiglamide	238.733	288.191	0.850579	7.17978e-06	0.145237	2.22645e-05
93	Pos	Arginyl-Valine	365.483	274.187	0.849994	0.0450026	0.154916	8.01555e-07
94	Pos	L-Isoleucine	196.82	132.102	0.841547	0.0167636	6.41001	2.73567e-06
95	Pos	N6-Acetyl-L-lysine	358.771	189.123	0.840569	0.0962317	0.171624	2.5305e-06
96	Pos	Propyl 2-furoate	114.281	155.073	0.840391	0.00716398	0.116253	1.10119e-05
97	Pos	1,2,10-Trihydroxydihydro-trans-linalyl oxide 7-O-beta-D-glucopyranoside	354.252	383.191	0.839269	0.000125292	0.00232265	5.07641e-07
98	Pos	1-Isothiocyanato-3-phenylpropane	66.1151	178.071	0.834058	0.039501	0.208824	8.95551e-05
99	Pos	Norfuraneol	116.6	115.039	0.833191	0.00128469	0.0607289	7.8185e-05
100	Pos	D-Alanyl-D-alanine	50.4141	161.092	0.832306	0.0236679	0.680525	8.11876e-06
101	Pos	Edulone A	208.453	415.136	0.827919	3.7996e-05	0.0037351	3.64865e-05
102	Pos	(9S,10S)-10-hydroxy-9-(phosphonooxy)octadecanoate	414.794	397.244	0.821234	0.000150229	0.00870158	0.00153668
103	Pos	N-Carboxyethyl-g-aminobutyric acid	135.916	176.092	0.819718	0.0584208	0.325817	9.07252e-08
104	Pos	Morphine	398.018	286.151	0.816681	0.0286719	0.20043	4.13663e-05
105	Pos	D-Linalool 3-glucoside	353.143	317.193	0.809927	7.17978e-06	0.00603838	0.000136318
106	Pos	Prolyl-Alanine	345.291	187.108	0.802255	0.128245	0.581951	1.07943e-10
107	Pos	Pseudooxynicotine	229.697	179.118	0.802254	0.137863	0.225813	3.0147e-06
108	Pos	Prolylglycine	358.723	173.092	0.801885	0.0157664	0.0372342	2.36806e-07
109	Pos	Perilloside A	525.663	315.188	0.801112	7.17978e-06	0.00177388	0.00313185
110	Pos	Merodesmosine	440.713	403.255	0.799466	0.00382979	0.0123943	4.47061e-07
111	Pos	N-Acetylneuraminic acid	104.954	310.114	0.797475	0.0157723	0.0507693	2.76321e-07
112	Pos	3-(4-Methyl-3-pentenyl)thiophene	116.604	167.093	0.794357	0.0277021	0.0623893	0.000228242
113	Pos	2-(Methylamino)benzoic acid	88.7587	152.071	0.786753	0.100568	0.264463	4.20362e-07
114	Pos	1-Ethyl-1H-pyrrole-2-carboxaldehyde	38.1372	124.076	0.783139	0.0109436	0.0336826	2.82337e-05
115	Pos	D-Tagatose	374.412	163.06	0.780591	0.0515059	0.105813	2.65668e-05
116	Pos	trans-S-(1-Propenyl)-L-cysteine	243.984	162.058	0.779781	0.103557	0.582412	2.42195e-07
117	Pos	Methylmalonic acid semialdehyde	122.1	103.039	0.778437	0.018437	0.0284366	9.90621e-05
118	Pos	Rutarin	190.666	425.141	0.778168	0.00630606	0.0106527	0.000104016
119	Pos	Methylimidazole acetaldehyde	344.2	125.071	0.766354	0.0213406	0.058965	2.0457e-07
120	Pos	4,8 Dimethylnonanoyl carnitine	269.06	330.263	0.766045	0.143239	2.36356	2.39237e-06
121	Pos	Flazine	208.46	309.087	0.765408	0.00580761	0.0370578	0.00328704
122	Pos	Indoleacrylic acid	307.448	188.074	0.761315	0.0119929	0.0219136	9.94212e-05
123	Pos	1-Aminocyclopropanecarboxylic acid	229.899	102.047	0.753725	0.00222173	0.0124607	9.35026e-07
124	Pos	3'-N'-Acetylfusarochromanone	441.831	335.156	0.752333	0.00274758	0.00673726	3.26291e-05
125	Pos	Pandamarilactam 3x	68.3568	236.132	0.738891	0.00767332	0.028713	2.74505e-06
126	Pos	Casuarine 6-alpha-D-glucoside	336.75	368.155	0.735222	0.00172961	0.00274913	0.000318987
127	Pos	2-Methoxyestradiol	399.051	303.203	0.733289	0.00237743	0.00919221	6.52546e-07
128	Pos	1-Naphthaleneacetic acid	251.184	187.071	0.732164	0.010804	0.0546958	2.63732e-06
129	Pos	2-Phenylacetamide	42.5703	136.076	0.731951	0.00901351	0.625501	3.02367e-06
130	Pos	Corticosterone	388.972	347.229	0.729641	0.00112202	0.0100842	1.77687e-05
131	Pos	Dihydro-5-methyl-2(3H)-furanone	392.341	101.06	0.729261	0.00569206	0.019665	7.47912e-07
132	Pos	1,2,3,4-Tetrahydro-beta-carboline	140.292	173.107	0.724449	0.0100661	0.0208278	3.35008e-05
133	Pos	Tyrosine methylester	43.7622	196.097	0.72125	0.0269486	0.0434803	0.00154769
134	Pos	2-(2-Methylbutanoyl)-9-(3-methyl-2E-pentenoyl)-2b,9a-dihydroxy-4Z,10(14)-oplopadien-3-one	429.331	431.286	0.72088	7.17978e-06	0.00186587	0.000179648
135	Pos	3-Amino-2-piperidone	94.1281	115.087	0.720286	0.0354672	0.0712766	1.16788e-06
136	Pos	3-Aminocaproic acid	35.9057	132.102	0.713436	0.0516811	0.118658	1.24909e-07
137	Pos	4-Ethyl-2-heptylthiazole	53.7655	212.143	0.711867	0.00715862	0.0224864	7.3399e-06
138	Pos	Homocarnosine	181.356	241.129	0.70529	0.00356511	0.0146328	4.25031e-07
139	Pos	Ceanothine D	437.351	485.308	0.703908	7.17978e-06	0.000820542	0.00037307
140	Pos	Isopulegone caffeate	168.123	317.182	0.69677	7.17978e-06	0.00773801	4.37705e-06
141	Pos	2-Keto-6-acetamidocaproate	94.1855	188.092	0.694111	0.0100826	0.0184128	3.16066e-05
142	Pos	Lagerstroemine	64.1462	438.231	0.690401	5.83044e-05	0.000968039	0.00748052
143	Pos	(3''-Apiosyl-6''-malonyl)astragalin	480.223	667.171	0.68084	0.00286242	0.00655586	0.000106245
144	Pos	Glyceryl lactooleate	226.892	429.318	0.677845	7.17978e-06	0.000404782	0.0171844
145	Pos	Verimol G	415.914	347.193	0.672302	0.00459912	0.0109417	1.70621e-05
146	Pos	Histidinyl-Leucine	308.043	269.161	0.670947	0.0444114	0.232798	1.29262e-09
147	Pos	Isoleucyl-Tryptophan	206.224	318.181	0.670532	0.0116484	0.149782	0.000108335
148	Pos	Acetylhomoserine	301.513	162.076	0.669978	0.21563	0.39824	0.000256252
149	Pos	Brevianamide B	285.332	366.177	0.665834	6.60237e-05	0.00595333	8.12211e-05
150	Pos	Perilloside C	426.026	317.193	0.66556	0.00162853	0.00687874	1.39618e-05
151	Pos	Prolyl-Arginine	451.076	272.171	0.66523	0.0168082	0.0967828	8.60388e-05
152	Pos	Lysyl-Gamma-glutamate	455.32	275.171	0.649622	0.00283748	0.0132198	0.0142174
153	Pos	Scutigeral	256.784	373.245	0.639414	0.00175114	0.0105602	1.96059e-06
154	Pos	9H-Carbazole-3-carboxaldehyde	249.389	196.076	0.633638	0.003476	0.0134434	3.02785e-06
155	Pos	11,12,14-Trihydroxy-7-methoxy-8,11,13-abietatrien-20,6-olide	463.264	377.203	0.632652	0.000535665	0.0042498	4.79101e-07
156	Pos	Trans-2, 3, 4-Trimethoxycinnamate	167.463	239.091	0.6307	0.00261048	0.00421958	0.000179374
157	Pos	Koenigine	325.029	310.153	0.630318	7.17978e-06	0.00468271	0.000297511
158	Pos	Dihydrofukinolide	344.158	393.224	0.629346	4.70369e-05	0.00148915	2.71361e-06
159	Pos	Hexanoylglycine	132.466	174.112	0.620633	0.0066995	0.0164112	3.65259e-07
160	Pos	Isopentyl beta-D-glucoside	146.845	251.15	0.619531	0.00644836	0.153668	1.63741e-06
161	Pos	Goyaglycoside c	28.0106	663.452	0.614876	0.0372143	0.0582239	0.00110419
162	Pos	Allyl benzoate	184.756	207.105	0.608935	0.127438	0.447553	1.17965e-08
163	Pos	5-Aminopentanal	245.071	102.092	0.604889	0.00850717	0.0304369	1.17841e-07
164	Pos	Lysyl-Proline	473.856	244.166	0.603778	0.0137674	0.0432172	2.00977e-06
165	Pos	Calystegine B5	123.118	176.092	0.601719	0.0512757	0.252541	3.26799e-08
166	Pos	Glycyl-Valine	367.678	175.108	0.600879	0.63173	0.987706	3.48439e-05
167	Pos	Melitric acid B	490.177	521.111	0.593274	7.17978e-06	0.00207759	5.85135e-06
168	Pos	N-Methylcalystegine C1	183.856	206.102	0.592657	0.667436	5.06892	9.67782e-09
169	Pos	S-[1-[2-(Acetyloxy)ethyl]butyl] ethanethioate	190.559	219.102	0.589435	0.0280833	0.0383875	0.00121189
170	Pos	Ubiquinone-2	435.618	319.197	0.576819	7.17978e-06	0.00847178	0.00121597
171	Pos	2-Phenylethyl beta-D-glucopyranoside	150.588	285.134	0.575231	0.00277803	0.0453298	4.47223e-06
172	Pos	Enterocin 900	436.168	452.251	0.574323	7.17978e-06	0.0121328	1.94819e-05
173	Pos	2,4-Dimethyloxazole	82.0389	98.0604	0.573113	0.0527629	0.154103	5.11527e-07
174	Pos	6-Hydroxyetodolac	401.32	304.162	0.56438	0.0124559	0.0294372	8.71379e-06
175	Pos	Valyl-Histidine	162.232	255.145	0.562787	0.000244493	0.0588517	7.62132e-05
176	Pos	Perillyl acetate	31.4191	195.138	0.56128	0.0679675	0.388697	0.00456588
177	Pos	Dihydroferuperine	287.533	290.171	0.559554	0.000816651	0.0175765	4.64612e-09
178	Pos	Formiminoglutamic acid	219.762	175.071	0.559314	0.00569055	0.0216782	6.03153e-08
179	Pos	Tyrosyl-Alanine	267.786	253.118	0.559168	0.00223565	0.0141184	0.000217065
180	Pos	CPA(18:2(9Z,12Z)/0:0)	473.451	417.246	0.553846	0.000241227	0.00315933	1.94266e-08
181	Pos	Methyldopa	237.739	212.092	0.553089	0.0158406	0.0427311	2.44251e-06
182	Pos	1,4'-Bipiperidine-1'-carboxylic acid	192.829	213.16	0.552801	7.24513e-05	0.0080258	2.45177e-05
183	Pos	Osmundalactone	392.326	129.055	0.548558	0.00417532	0.0351738	7.82044e-09
184	Pos	Deoxyribose	93.0665	117.055	0.540802	0.00857697	0.014406	0.000187695
185	Pos	Dihydro-4,6-dimethyl-2-(1-methylpropyl)-4H-1,3,5-dithiazine	158.726	206.102	0.540507	0.447171	1.99428	6.55029e-08
186	Pos	4-(2-Furanylmethylene)-3,4-dihydro-2H-pyrrole	270.198	148.076	0.538606	0.0115002	0.0171283	0.000684147
187	Pos	LysoPC(20:3(5Z,8Z,11Z))	331.801	546.365	0.53305	9.34736e-05	0.00925907	3.2237e-05
188	Pos	Dihydrouracil	64.9919	115.05	0.532832	0.0039607	0.0269462	7.00028e-08
189	Pos	Ebastine	122.897	470.297	0.528348	0.000117609	0.00240041	0.00257027
190	Pos	Serylisoleucine	471.247	219.134	0.526372	0.00464821	0.0261468	2.43856e-05
191	Pos	2-Bromo-1H-indole-3-carboxaldehyde	314.12	223.972	0.52315	0.00152457	0.00874503	0.000166016
192	Pos	5-Amino-2-oxopentanoic acid	79.7902	132.066	0.518994	0.0338683	0.0617844	1.60959e-05
193	Pos	4-(4-Hydroxyphenyl)-2-butanone O-[2,6-digalloylglucoside]	256.844	631.171	0.517491	3.35728e-05	0.00668669	0.000396775
194	Pos	Safynol	210.806	201.087	0.517436	0.00629328	0.015361	8.87072e-09
195	Pos	Dopamine	47.0199	154.086	0.516539	0.0104011	0.0253115	0.00908687
196	Pos	Curcumin I	61.6262	397.164	0.511789	0.000798976	0.00770038	5.9339e-05
197	Pos	Diosbulbin B	244.762	345.127	0.510692	0.000359107	0.00483586	0.000239441
198	Pos	Cis-zeatin	187.389	220.118	0.51055	0.0105614	0.0521601	1.17198e-10
199	Pos	19(20)-EpDPE	355.515	345.25	0.51033	0.000400387	0.00853101	5.1712e-05
200	Pos	Glycine	372.172	76.0398	0.509204	0.0268789	0.0460892	0.000185436
201	Pos	D-Galactose	150.211	163.06	0.508083	0.0112593	0.0410926	3.54693e-06
202	Pos	Sulforhodamine B	301.229	559.151	0.506166	0.00361451	0.0141735	1.2094e-05
203	Pos	Tryptophyl-Phenylalanine	191.659	352.166	0.505967	0.000487168	0.0061624	0.00220656
204	Pos	Rosmaricine	455.33	346.208	0.504979	7.17978e-06	0.00915692	5.36402e-05
205	Pos	Fragransin C1	25.9737	375.183	0.50095	1.44631e-05	0.000590446	0.000230208
206	Pos	1-Propenyl propyl sulfide	62.75	117.074	0.495685	0.00531316	0.0469753	1.21573e-07
207	Pos	Glycerol trihexanoate	326.025	387.272	0.493079	3.66284e-05	0.000833013	3.71618e-07
208	Pos	Myricanone	28.0007	357.173	0.488507	8.02725e-05	0.0032737	8.46419e-07
209	Pos	Valyl-Proline	275.648	215.139	0.487048	0.0335684	0.196335	0.00045872
210	Pos	desmethylclomipramine	388.961	301.151	0.486554	7.17978e-06	0.00779744	6.44189e-06
211	Pos	Hesperetin 3',7-O-diglucuronide	218.117	651.192	0.486463	0.000227973	0.00556011	1.70244e-10
212	Pos	cis-4-Hydroxy-D-proline	64.9989	132.066	0.486286	0.0230308	0.32433	2.3941e-05
213	Pos	Indole-3-propionic acid	270.198	190.086	0.484116	0.0187579	0.0359789	1.00399e-05
214	Pos	myo-Inositol	306.94	203.053	0.483087	0.0426764	0.0662406	0.000614269
215	Pos	Histidinyl-Threonine	355.356	257.124	0.483027	0.00939359	0.0181266	0.000331234
216	Pos	(2R,3R,4R)-2-Amino-4-hydroxy-3-methylpentanoic acid	285.842	148.097	0.482342	0.0193997	0.945031	2.81522e-06
217	Pos	Tricholomic acid	417.059	161.056	0.474968	0.00275177	0.00863092	5.34849e-07
218	Pos	6-(1-Hydroxyethyl)-2,2-dimethyl-2H-1-benzopyran	51.5308	205.118	0.461026	0.0156706	0.594171	4.89279e-06
219	Pos	Melibiose	374.408	360.15	0.458686	0.220261	3.32696	3.6674e-06
220	Pos	(all-E)-3,5,7-Tridecatriene-9,11-diyn-1-ol	68.4016	187.108	0.455276	0.00895393	0.0661897	4.5033e-06
221	Pos	Angelicain	301.515	293.099	0.452596	0.42398	1.32835	0.00196608
222	Pos	Biotin amide	78.6029	244.118	0.452416	0.0034201	0.0279722	2.85067e-05
223	Pos	Mahanimbinine	233.224	350.219	0.450156	7.17978e-06	0.00236574	0.0007622
224	Pos	Furomammea G	439.559	389.203	0.448555	0.000548474	0.00339503	1.27885e-09
225	Pos	Threoninyl-Proline	339.649	217.118	0.44792	0.0146179	0.14969	1.91373e-05
226	Pos	Glucosyl (2E,6E,10x)-10,11-dihydroxy-2,6-farnesadienoate	217.513	433.248	0.447919	7.17978e-06	0.000335043	0.00578887
227	Pos	Erinacine C	71.7603	435.27	0.446408	6.40498e-05	0.00362657	3.15542e-05
228	Pos	1-(5Z,8Z,11Z,14Z-eicosatetraenoyl)-sn-glycero-3-phosphate	463.237	459.256	0.441813	7.17978e-06	0.00081099	0.000326794
229	Pos	Vitexin 4'-O-alpha-L-Rhamnopyranoside	299.702	579.162	0.440603	0.00164169	0.00781698	7.58264e-05
230	Pos	2-Propenyl phenylacetate	275.794	177.095	0.439784	0.00641862	0.0363916	5.9558e-09
231	Pos	Trimethyl-2-propenylpyrazine	171.487	163.123	0.436204	0.00449822	0.00718724	0.00147616
232	Pos	Tsangane L 3-glucoside	376.65	375.235	0.433448	0.0018473	0.00538699	1.98097e-06
233	Pos	Glycyl-Lysine	111.881	204.134	0.432613	0.0649897	0.39084	1.45535e-07
234	Pos	Piperochromanoic acid	99.5941	357.213	0.426	0.000104966	0.00924049	4.66635e-05
235	Pos	2-(4-Allyl-2,6-dimethoxyphenoxy)-1-(3,4,5-trimethoxyphenyl)-1-propanol	23.5012	419.209	0.425799	6.83259e-05	0.000357592	8.96427e-05
236	Pos	N2-Galacturonyl-L-lysine	201.975	323.145	0.424668	4.84157e-05	0.00852972	0.000149642
237	Pos	Dihydro-3-(2-octenyl)-2,5-furandione	57.7531	211.133	0.424183	0.0236426	0.0452863	9.37054e-05
238	Pos	Norchalciporyl propionate	325.369	260.172	0.421976	7.17978e-06	0.00215227	1.84448e-05
239	Pos	5',5''',8,8''-Tetrahydroxy-3',3''',4',4''',7',7''-hexamethoxy-5,5''-biflavan	249.967	663.251	0.421456	3.62411e-05	0.00154813	0.0163632
240	Pos	Muzanzagenin	80.9183	443.286	0.415528	2.63819e-05	0.00284496	0.00607963
241	Pos	4-Hydroxy-4-(3-pyridyl)-butanoic acid	225.429	182.081	0.407929	0.00378679	0.015472	0.00012235
242	Pos	7-Aminomethyl-7-carbaguanine	116.65	180.086	0.40677	0.515115	1.78305	9.43908e-06
243	Pos	Vaccinoside	218.797	537.16	0.404709	7.17978e-06	0.00548091	1.83911e-06
244	Pos	5-Methyltetrahydrofolic acid	353.366	460.203	0.402867	4.83563e-05	0.0132288	3.12446e-05
245	Pos	N-Acetylglutamine	409.181	189.087	0.401123	0.00786381	0.0149697	0.00027772
246	Pos	3-O-Caffeoylshikimic acid	293.085	337.098	0.399536	0.000798051	0.0301312	0.00279355
247	Pos	Danazol	63.8732	340.223	0.397679	0.000618478	0.0489963	9.20473e-05
248	Pos	Nequinate	322.993	366.177	0.396543	7.17978e-06	0.00347571	0.000140134
249	Pos	D-Alanine	126.718	90.0554	0.396463	0.0738113	0.143758	0.00404123
250	Pos	Norpropoxyphene	307.121	326.207	0.395981	0.00262741	0.0222354	0.000461442
251	Pos	Bakers yeast extract	111.822	275.112	0.395493	7.17978e-06	0.0361463	4.05259e-06
252	Pos	gamma-L-Glutamyl-L-pipecolic acid	288.924	259.129	0.394584	0.00377828	0.00853506	2.38675e-07
253	Pos	cis-p-Coumaric acid 4-[apiosyl-(1->2)-glucoside]	296.153	459.155	0.39332	7.17978e-06	0.00206479	0.00506781
254	Pos	DHAP(18:0)	115.161	437.275	0.392243	0.000860285	0.00465241	0.00136057
255	Pos	(all-E)-1,7-bis(4-hydroxyphenyl)-1,4,6-heptatrien-3-one	111.84	293.123	0.391456	2.35662e-05	0.0332383	3.04684e-05
256	Pos	Glutaminylvaline	127.828	246.145	0.390825	0.00962144	0.0763483	4.5531e-05
257	Pos	Octadecanedioic acid	149.266	315.253	0.386152	0.00660467	0.0549032	8.36468e-06
258	Pos	N-Methylschinifoline	203.018	256.133	0.386034	0.000222665	0.013983	4.82126e-05
259	Pos	Gravacridonetriol	428.35	358.134	0.384948	8.55925e-05	0.00650773	3.50301e-06
260	Pos	Isoswertiajaponin	301.361	463.134	0.379262	0.00149668	0.00645204	0.00335963
261	Pos	N-Acetylasparagine	415.887	175.071	0.376601	0.0605852	0.0776722	2.95818e-05
262	Pos	Lysyl-Aspartate	149.447	262.14	0.375536	0.0218748	0.0458172	1.41939e-06
263	Pos	4-Methoxybenzenepropanol 1-(2-sulfoglucoside)	187.173	409.119	0.368658	0.000161865	0.0186571	0.00611401
264	Pos	Euglobal Ia1	109.55	387.224	0.364442	0.00192537	0.00503982	0.000636547
265	Pos	Piperundecalidine	283.534	368.229	0.360994	0.0026135	0.0197761	0.000239109
266	Pos	(2E,8E)-Piperamide-C9:2	131.333	328.187	0.35943	0.00919621	0.0259193	6.79396e-07
267	Pos	1-Methoxyphaseollidin	62.6286	355.154	0.358062	0.00214364	0.00450742	1.66872e-05
268	Pos	Norbuprenorphine	399.015	414.271	0.35775	7.17978e-06	0.00147928	5.80944e-05
269	Pos	Kanzonol F	133.421	421.208	0.354251	4.55203e-05	0.00813866	3.05898e-05
270	Pos	Norverapamil	90.0094	441.271	0.35367	0.00019457	0.00393102	7.01474e-06
271	Pos	N-cis-Feruloyltyramine	181.59	314.145	0.352732	0.00568387	0.0107853	6.52876e-05
272	Pos	Hydroxyprolyl-Valine	79.607	231.134	0.345843	0.00381066	0.122214	3.50083e-05
273	Pos	L,L-Cyclo(leucylprolyl)	94.1909	233.128	0.341611	0.00380609	0.188101	4.21196e-06
274	Pos	Cadabicine methyl ether	151.447	450.244	0.340544	7.17978e-06	0.000231995	0.00168007
275	Pos	Thiodiglycol	74.0824	123.048	0.340015	7.17978e-06	0.0196615	1.48373e-05
276	Pos	Phenethylamine glucuronide	133.491	298.132	0.333113	0.00326236	0.0107419	1.37454e-06
277	Pos	Oxymorphone	433.856	302.135	0.333068	0.00417842	0.0164009	0.000538676
278	Pos	Pyrraline	51.5557	255.134	0.33057	0.000979075	0.0378466	0.000233743
279	Pos	2-Hydroxy-3-(3,4-dihydroxyphenyl)propanamide	427.13	198.076	0.330127	0.0273169	0.0530384	1.00696e-05
280	Pos	Luteolin 7-sulfate	43.7025	367.011	0.329913	7.17978e-06	0.00976642	5.44343e-07
281	Pos	N-Acetyl-b-glucosaminylamine	88.8625	221.113	0.327947	0.00260715	0.190083	3.04864e-05
282	Pos	Threoninyl-Isoleucine	481.892	233.15	0.327581	0.000359743	0.0181196	3.69548e-05
283	Pos	Encelin	428.268	245.113	0.326074	0.0296683	0.372606	1.52568e-05
284	Pos	Tetrahydroharmol	193.369	203.118	0.322116	0.0237411	0.718011	2.78095e-06
285	Pos	1,3,8-Trihydroxy-4-methyl-2,7-diprenylxanthone	116.912	395.192	0.320589	0.000484071	0.0049497	0.0028291
286	Pos	Marmeline	244.336	352.186	0.320212	8.06364e-05	0.00694533	6.49584e-06
287	Pos	Ganoderic acid theta	249.382	531.292	0.320079	2.9834e-05	0.00125213	8.56169e-08
288	Pos	7-Hydroxyheptaphylline	161.392	296.134	0.318173	0.0186634	0.0326305	0.000932665
289	Pos	Resolvin D2	106.209	359.229	0.318118	0.00663867	0.0099872	0.000621184
290	Pos	Nomilinic acid 17-glucoside	249.844	713.292	0.317275	7.17978e-06	0.00378289	0.000355739
291	Pos	Nepetaside	114.01	347.171	0.316286	0.000170028	0.00599537	0.00185004
292	Pos	4-tert-Butylphenyl salicylate	165.697	271.14	0.315923	0.00167568	0.0185785	0.000191019
293	Pos	Homoclausenamide	290.322	280.137	0.315363	0.00128383	0.00429145	9.02149e-05
294	Pos	(R)-Higenamine	293.507	272.134	0.312188	0.0014686	0.186393	8.44201e-06
295	Pos	Alanyl-Proline	158.181	187.108	0.311781	0.00414218	0.0923828	9.19678e-06
296	Pos	2-Heptylbenzothiazole	94.5616	234.132	0.311576	0.00560892	0.0193007	2.48704e-07
297	Pos	CPA(18:0/0:0)	226.09	421.281	0.306724	7.17978e-06	0.000177055	0.00125806
298	Pos	1-(9Z-hexadecenoyl)-glycero-3-phosphate	310.469	409.244	0.306526	7.17978e-06	0.00165875	6.77334e-05
299	Pos	Boviquinone 4	57.0774	413.275	0.306472	6.55877e-05	0.00873877	0.000530388
300	Pos	Isoleucyl-Hydroxyproline	59.3855	245.149	0.305367	0.00173508	0.23025	1.10799e-05
301	Pos	(1xi,3xi)-1,2,3,4-Tetrahydro-1-methyl-beta-carboline-3-carboxylic acid	248.967	231.112	0.302129	0.076629	6.92415	1.31226e-06
302	Pos	Tromethamine	305.246	122.081	0.301137	0.00460189	0.0119912	2.21381e-07
303	Pos	2-Pyrrolidinone	349.861	86.0605	0.99992	0.732141	0.408343	3.69781e-07
304	Pos	Cytarabine	249.848	244.093	0.998892	0.269783	0.0139629	0.0112526
305	Pos	D-Proline	317.444	116.071	0.998816	5.69724	3.48812	4.71681e-05
306	Pos	Carbadox	354.243	263.074	0.998424	0.119078	0.0771283	3.48923e-05
307	Pos	Kaempferol	179.389	287.055	0.997514	0.514803	0.251474	1.65462e-05
308	Pos	4-Methoxybenzyl O-(2-sulfoglucoside)	427.083	381.079	0.99719	0.041079	0.0190735	3.62717e-06
309	Pos	L-N-(1H-Indol-3-ylacetyl)aspartic acid	286.951	291.105	0.996606	0.10802	0.0149691	6.65084e-05
310	Pos	Adenosine	172.599	268.104	0.996583	0.810117	0.0315798	8.58474e-05
311	Pos	N6-Methyladenosine	286.235	282.118	0.996501	0.27634	0.0133258	0.000150488
312	Pos	Ginkgolide C	247.839	441.137	0.995924	0.0172795	0.00797867	1.74147e-05
313	Pos	p-Aminobenzoic acid	294.804	138.055	0.995265	15.4793	12.4876	0.000480143
314	Pos	Guanine	237.342	152.056	0.99425	0.983055	0.204595	3.17078e-07
315	Pos	Protoanemonin	426.407	97.0288	0.994092	0.0685496	0.0194276	2.19903e-05
316	Pos	BL V	330.68	425.084	0.99399	0.00850082	0.00217888	0.00111939
317	Pos	Kaempferol 3-O-glucosyl-(1->2)-rhamnoside	271.058	595.165	0.993973	1.31834	0.123205	0.000479707
318	Pos	Adenosine 2'-phosphate	442.882	348.07	0.99382	0.00284205	0.000327822	0.000645595
319	Pos	Tryptamine	203.948	161.107	0.993732	0.705377	0.198113	3.98281e-08
320	Pos	Prostaglandin H2	64.9891	335.219	0.993584	0.016746	0.00328324	0.00139972
321	Pos	L-Asparagine	385.595	133.06	0.993534	12.4502	6.77418	3.81442e-06
322	Pos	L-gamma-Glutamyl-S-allylthio-L-cysteine	360.956	323.074	0.992962	0.098107	0.0371491	1.4165e-05
323	Pos	Deoxyadenosine	136.779	252.109	0.992925	1.81709	0.00908044	3.67564e-05
324	Pos	3alpha,4,7,7alpha-Tetrahydro-1H-isoindole-1,3(2H)-dione	205.099	152.071	0.992737	0.0572032	0.011788	3.35927e-05
325	Pos	Rhamnazin 3-rutinoside	166.671	639.204	0.991928	0.0101821	0.00450848	7.48449e-05
326	Pos	Genistein	241.082	271.06	0.9916	0.0174115	0.00153121	0.00067932
327	Pos	D-Glutamine	383.354	147.076	0.990091	15.0447	0.360634	4.94552e-06
328	Pos	Hypoxanthine	173.622	137.046	0.989849	23.1577	12.9951	0.000156118
329	Pos	Cosmosiin	153.571	433.113	0.989751	0.116475	0.000447766	0.000226105
330	Pos	D-Serine	384.476	106.05	0.989725	1.08362	0.605318	5.86235e-06
331	Pos	20-Hydroxy-PGE2	117.684	351.214	0.989064	0.00732221	0.000518702	0.00118442
332	Pos	3-Buten-2-one	255.101	71.0496	0.989052	0.00513281	0.00108883	0.000606935
333	Pos	3-Methylcytosine	194.042	126.066	0.988318	0.918383	0.141567	0.000178554
334	Pos	4'-Methyl-(-)-epigallocatechin 7-glucuronide	182.71	497.142	0.988307	0.00387778	0.00137553	7.06899e-05
335	Pos	Kaempferol 3-alpha-L-arabinofuranoside	188.299	419.097	0.988087	0.222787	0.000414243	0.000126201
336	Pos	2-Aminoacrylic acid	385.594	88.0397	0.987877	0.137622	0.0746404	1.79821e-06
337	Pos	3-Methylguanine	160.292	166.072	0.987803	0.858405	0.65311	0.00208285
338	Pos	2'-O-Methyladenosine	89.6316	282.119	0.986409	0.252363	0.00295549	1.52142e-05
339	Pos	Prostaglandin G2	53.3635	351.214	0.986361	0.020163	0.00144587	0.000873412
340	Pos	6-Methylquinoline	203.963	144.081	0.985203	2.44412	0.70882	3.25341e-08
341	Pos	Oleamide	188.326	282.279	0.984816	0.173717	6.87245e-06	0.000295034
342	Pos	4-Hydroxy-2-butenoic acid gamma-lactone	303.748	85.0288	0.984287	0.155317	0.0411582	0.000544176
343	Pos	1,3,5-Trihydroxybenzene	153.339	127.039	0.983941	0.117248	0.0584625	0.00140608
344	Pos	Gibberellin A90	503.646	349.16	0.982479	0.00556648	0.00290529	0.00212311
345	Pos	Pyroglutamic acid	383.342	130.05	0.981898	6.87519	0.119029	1.18942e-05
346	Pos	Arecaidine	363.197	128.071	0.980767	1.72268	1.30148	0.00129731
347	Pos	L-trans-4-Methyl-2-pyrrolidinecarboxylic acid	327.483	130.097	0.980549	0.0842723	0.0232346	8.13164e-05
348	Pos	Luteolin	304.375	287.055	0.978276	0.0197539	0.00353036	0.000523503
349	Pos	Luteolin 4'-glucoside	414.782	449.108	0.977885	0.136141	0.00790324	0.000423452
350	Pos	Isoquercitrin	305.439	465.103	0.97607	0.0132842	0.00292429	0.00343581
351	Pos	Daidzein	101.495	255.065	0.973893	0.00719089	0.00430555	0.000157577
352	Pos	Oxfendazole	360.958	316.079	0.972507	0.0576573	0.00449857	1.92817e-05
353	Pos	(Â±)-Tryptophan	274.348	205.097	0.971106	3.34519	0.150596	0.00031949
354	Pos	7-Aminoclonazepam	215.173	286.071	0.970921	0.133826	0.00214553	0.000258391
355	Pos	1H-Indole-3-carboxaldehyde	271.313	146.06	0.967175	0.115553	0.0228262	0.0200503
356	Pos	Isonicotinic acid	437.337	124.039	0.959289	0.0173675	0.00927046	2.41889e-05
357	Pos	Pyrophaeophorbide a	71.7248	535.268	0.958161	2.42704	4.93287e-05	1.09818e-05
358	Pos	L-Tyrosine	313.513	182.081	0.958062	5.72591	0.928189	4.43284e-05
359	Pos	5'-Methylthioadenosine	105.406	298.097	0.957924	0.00228757	0.0010348	0.00579482
360	Pos	L-Arginine	519.516	175.119	0.954237	4.46639	0.216743	0.000552311
361	Pos	(alpha-D-mannosyl)7-beta-D-mannosyl-diacetylchitobiosyl-L-asparagine, isoform A (protein)	374.413	90.0553	0.953658	1.47799	0.661732	2.04958e-07
362	Pos	Garciduol B	192.779	503.095	0.953195	0.0118602	6.87245e-06	1.34041e-05
363	Pos	Cyanidin 3-(4-acetylglucoside)	174.459	491.118	0.950874	0.00563837	0.0008258	0.000718609
364	Pos	Luteolin 7-galactoside	509.693	449.108	0.945985	0.295359	0.0177474	0.00220571
365	Pos	Cyanidin 3-galactoside	486.326	449.108	0.944573	0.363366	0.0239884	0.0117781
366	Pos	Fenpropimorph	189.422	304.263	0.943603	0.0321385	6.87245e-06	5.93033e-05
367	Pos	5,7-Dimethoxyflavone	142.144	283.103	0.942513	0.0346696	0.000237263	0.000207289
368	Pos	p-Mentha-1,8-dien-7-ol	127.841	135.117	0.941722	0.099108	0.0641623	0.000437171
369	Pos	beta-D-Glucosamine	138.186	180.088	0.94155	0.605608	0.105539	0.000142038
370	Pos	5-Methyl-2(3H)-furanone	257.429	99.0444	0.940634	0.229356	0.056019	0.0373305
371	Pos	Simmondsin	509.267	376.171	0.940327	0.0013634	0.000663226	3.38822e-06
372	Pos	Luteolin 7-glucoside	536.246	449.108	0.940293	0.251819	0.0185455	0.00331179
373	Pos	Secoeremopetasitolide B	311.547	395.202	0.940219	0.00496731	0.000457739	3.935e-05
374	Pos	1-(1-Pyrrolidinyl)-2-butanone	357.605	142.123	0.939905	0.119815	0.092341	0.000184067
375	Pos	Sinapyl alcohol	156.302	193.086	0.939189	0.15535	0.0680743	0.000669322
376	Pos	Thyrotropin releasing hormone	478.129	363.176	0.934883	0.00833353	0.00554648	0.000353975
377	Pos	Grevilline D	449.668	357.055	0.933375	0.00241059	9.11735e-05	2.39908e-05
378	Pos	Racemethionine	295.922	150.058	0.931657	1.92461	1.15605	0.000265058
379	Pos	1-Pentanesulfenothioic acid	141.253	137.046	0.928335	0.294715	0.0135999	0.000229066
380	Pos	a-L-Arabinofuranosyl-(1->2)-[a-D-mannopyranosyl-(1->6)]-D-mannose	385.594	475.177	0.925328	0.0327833	0.0141326	0.000158285
381	Pos	LysoPE(22:0/0:0)	211.851	538.387	0.924562	0.0119933	6.87245e-06	0.0136309
382	Pos	Suberylglycine	169.113	232.118	0.924203	0.488241	0.076329	0.000620948
383	Pos	Peonidin-3-glucoside	127.601	463.123	0.918067	0.0253836	0.000161251	0.000368115
384	Pos	2,4-Dimethylfuran	72.8173	97.0651	0.917216	0.0451492	6.87245e-06	0.000122565
385	Pos	Mukoenine A	444.02	266.159	0.914485	1.1708	0.572129	3.27617e-05
386	Pos	gamma-Glutamylalanine	420.401	219.098	0.913263	0.11344	0.0681482	5.09433e-05
387	Pos	4'-Hydroxy-5,7-dimethoxyflavan	405.817	287.124	0.911114	0.0228992	0.0158848	0.000646434
388	Pos	Ecgonine methyl ester	238.215	200.128	0.910511	0.0224447	0.00986852	0.00186988
389	Pos	3alpha,4,5,7alpha-Tetrahydro-5-hydroxy-1H-isoindole-1,3(2H)-dione	79.6121	168.065	0.899523	0.0850782	0.0537606	0.000204182
390	Pos	2-Pyrrolidineacetic acid	289.297	130.097	0.898896	0.200501	0.0504985	0.000823229
391	Pos	Diosmetin 7-neohesperidoside	237.706	609.181	0.898828	0.00378243	0.000162793	0.00190361
392	Pos	5-Phenyl-1,3-oxazinane-2,4-dione	288.066	192.065	0.897207	0.00672978	0.00273868	0.0175264
393	Pos	Quinone	307.168	109.029	0.894804	0.0361268	0.00667091	0.00114474
394	Pos	Moracin P	343.599	327.126	0.891107	0.0180943	0.00283173	1.54922e-06
395	Pos	Rosmic acid	468.22	391.171	0.887732	0.00814429	0.00276373	4.17924e-06
396	Pos	Glycerophosphocholine	393.468	258.11	0.882391	10.6865	0.462678	1.32406e-05
397	Pos	Phytyl diphosphate	159.198	457.24	0.881112	0.00616509	0.000926208	0.000608441
398	Pos	Anigorufone	128.928	273.094	0.88081	0.215947	0.0127886	0.00010937
399	Pos	Saccharopine	463.304	277.139	0.880453	0.044918	0.0198073	0.00102265
400	Pos	Tyramine glucuronide	248.655	314.121	0.878767	0.0164456	0.00187064	3.62456e-05
401	Pos	3-Chloro-1-(4-hydroxy-3-methoxyphenyl)-1,2-propanediol	288.07	233.063	0.874796	0.132733	0.0125171	0.00209682
402	Pos	2',4'-Dimethylacetophenone	129.363	149.096	0.873187	0.0759034	0.0469221	0.00083637
403	Pos	Moracin I	184.966	325.143	0.871411	0.00438113	0.000989209	2.49523e-07
404	Pos	(R)-Marmin	478.055	333.165	0.870324	0.0033778	0.00164187	0.00130737
405	Pos	S-Cysteinosuccinic acid	464.467	238.038	0.869695	0.102153	0.0308288	0.000505981
406	Pos	17-phenyl-18,19,20-trinor-prostaglandin E2	97.5524	369.204	0.868964	0.0251302	0.00272072	0.0021209
407	Pos	3b-Hydroxy-6b-angeloyloxy-7(11)-eremophilen-12,8b-olide	76.5547	349.198	0.867124	0.03788	0.0026607	1.99176e-05
408	Pos	2-Methylbutyroylcarnitine	373.294	246.17	0.866471	0.310004	0.0385552	9.55459e-05
409	Pos	1-(beta-D-Ribofuranosyl)-1,4-dihydronicotinamide	163.627	257.113	0.860873	0.187392	0.00478525	0.00011065
410	Pos	Norfloxacin	387.776	320.134	0.860325	0.00523359	0.00119228	0.00117334
411	Pos	2'-Hydroxygenistein 7-(6''-malonylglucoside)	260.691	535.109	0.859273	0.0253168	0.000354636	0.000197827
412	Pos	Glucopyranosylmoranoline	419.312	326.144	0.856581	6.43087	1.17953	4.652e-05
413	Pos	7-Hydroxy-3-(3-hydroxy-4-methoxybenzyl)-5-methoxy-4-chromanone	405.99	331.111	0.856391	0.02899	0.000233593	1.55042e-05
414	Pos	Piperitenone	93.4693	151.112	0.84204	0.0726751	0.0217799	0.000454302
415	Pos	Pelargonidin 3-rhamnoside	127.343	417.118	0.841173	0.00740639	0.000164365	0.00081138
416	Pos	Domoic acid	206.205	312.144	0.840711	0.0270904	0.00883848	4.22469e-05
417	Pos	N-Methylcalystegine B2	354.248	190.107	0.839991	0.296536	0.0664309	6.12924e-06
418	Pos	Dihydro-6-isopropyl-2,4-dimethyl-4H-1,3,5-dithiazine	80.6388	192.086	0.833682	1.46082	0.00697919	0.00137755
419	Pos	Spinacetin	405.817	347.085	0.833138	0.0128	5.1192e-05	0.000382445
420	Pos	Nicotinic acid mononucleotide	346.52	256.081	0.830795	1.83617	0.0587457	8.10908e-06
421	Pos	2-Methoxy-3-methylpyrazine	50.9881	125.071	0.830673	0.115822	0.0575539	0.00013053
422	Pos	1,2-Dimethoxy-13-methyl-[1,3]benzodioxolo[5,6-c]phenanthridine	401.303	348.129	0.829853	0.0101645	0.00785609	0.00216337
423	Pos	5,6-Dihydro-11-methoxyyangonin	409.176	291.119	0.827281	1.13969	0.0694908	2.07461e-08
424	Pos	5,7-Dihydroxy-3',4'-dimethoxy-8-(3-hydroxy-3-methylbutyl)-isoflavone 7-glucoside	187.018	563.21	0.826357	0.0488996	0.0334249	0.000838515
425	Pos	2-(4-Methoxyphenoxy)propanoic acid	97.5532	197.081	0.825288	0.0212622	0.00957619	0.00298378
426	Pos	Homofukinolide	466.652	431.239	0.822447	0.00241122	0.000256638	0.00122897
427	Pos	Isobutyric acid	128.066	89.0601	0.820565	0.0142811	6.87245e-06	0.000158962
428	Pos	3-Dehydrosphinganine	107.993	300.289	0.816472	1.99601	0.047137	5.83999e-05
429	Pos	3-(4-Isopropylphenyl)propanal	97.4736	177.127	0.811535	0.0350905	0.0131115	0.000907748
430	Pos	L-beta-aspartyl-L-glycine	436.651	191.066	0.810375	0.0136136	0.00678193	0.00171902
431	Pos	2-(1-Pentenyl)furan	90.9093	137.096	0.809795	0.164302	0.064682	6.96743e-05
432	Pos	Irilone 4'-glucoside	256.086	461.119	0.80865	0.0404981	7.60252e-05	0.000161118
433	Pos	2-Oxo-4-methylthiobutanoic acid	376.654	149.027	0.806544	0.0173175	0.00471062	1.96372e-06
434	Pos	(-)-Epiafzelechin	149.083	275.091	0.80519	0.00861827	0.00268457	0.000334516
435	Pos	Malondialdehyde	254.489	73.0289	0.803258	0.00666476	0.000812549	0.000440287
436	Pos	Phytosphingosine	146.84	318.3	0.802258	4.707	0.00760427	1.39621e-05
437	Pos	Alanyl-Valine	292.61	189.123	0.799174	0.0555409	0.0150566	0.00526138
438	Pos	PC(16:0/16:0)	163.637	734.568	0.794351	0.0867632	6.87245e-06	0.000235912
439	Pos	1-Isothiocyanato-7-(methylthio)heptane	393.452	204.087	0.79254	0.4304	0.271739	0.00201128
440	Pos	1-Isothiocyanato-8-(methylthio)octane	401.317	218.102	0.788991	0.161109	0.0722323	1.24166e-05
441	Pos	beta-D-Glucopyranosyl anthranilate	362.062	300.105	0.788002	0.0875443	0.00797517	0.000877119
442	Pos	2-Methylbutyrylglycine	337.429	160.097	0.785156	0.704897	0.432341	1.8977e-05
443	Pos	6-Chloro-N-(1-methylethyl)-1,3,5-triazine-2,4-diamine	273.532	188.07	0.784688	3.18185	0.145331	0.000245873
444	Pos	Glycerol	294.474	93.0573	0.78286	0.00819921	0.00612011	0.000283985
445	Pos	3-Methylglutarylcarnitine	232.14	290.16	0.781947	0.202477	0.0371136	6.4268e-06
446	Pos	5'-O-Desmethyl omeprazole	340.529	332.111	0.778158	0.0183737	0.000827992	0.000442333
447	Pos	5-Hexyl-1,4-dioxan-2-one	92.9942	187.133	0.77555	0.0407015	0.0160384	0.00035894
448	Pos	Linamarin	424.946	265.14	0.77286	0.0101556	0.0052136	1.37613e-05
449	Pos	Diaminopimelic acid	486.388	191.103	0.766834	0.0268231	0.00710607	0.00484432
450	Pos	ETF	256.916	101.024	0.766682	0.112096	0.0223723	0.0458531
451	Pos	Octadecanamide	115.471	284.294	0.764393	0.0369089	6.87245e-06	5.87955e-09
452	Pos	Quinceoxepine	29.7842	179.143	0.763024	0.0665899	0.00815089	5.19081e-07
453	Pos	Armillaramide	96.436	556.53	0.758221	0.0296661	6.87245e-06	0.00662051
454	Pos	5,10-Methylene-THF	417.059	458.187	0.754998	0.011071	0.00349933	1.50877e-05
455	Pos	20-Hydroxyeicosatetraenoic acid	29.132	321.242	0.753364	0.327661	0.0297768	0.040932
456	Pos	2,2,6,7-Tetramethylbicyclo[4.3.0]nona-1(9),4-dien-8-one	91.0817	191.143	0.748135	0.195934	0.0680862	6.59371e-05
457	Pos	N-Nitroso-pyrrolidine	289.346	101.071	0.747732	0.0175976	0.0104673	0.00188745
458	Pos	gamma-Glutamylleucine	370.361	261.144	0.741299	0.0544334	0.0151076	0.00770039
459	Pos	Isopentenyladenine-9-N-glucoside	346.33	364.196	0.74036	0.00772022	0.000751529	3.15856e-06
460	Pos	N-[(4E,8E)-1,3-dihydroxyoctadeca-4,8-dien-2-yl]hexadecanamide	89.657	536.503	0.740302	0.025232	6.87245e-06	0.000130888
461	Pos	Dihydroxyfumitremorgin C	429.425	412.182	0.737634	0.0347454	0.0048655	5.37373e-08
462	Pos	Junosidine	387.832	338.145	0.734682	0.0376805	0.0103279	2.76635e-05
463	Pos	2-Hydroxy-3-(4-methoxyphenyl)propanoic acid	169.256	197.081	0.734405	0.0552579	0.0136205	4.03034e-05
464	Pos	Allolithocholic acid	29.132	377.304	0.731432	0.0346753	0.0038378	5.0387e-06
465	Pos	11,12,13-Trinor-1(10)-spirovetivene-2,7-dione	100.367	193.122	0.728728	0.00710337	0.00134568	0.0172639
466	Pos	Formyl-5-hydroxykynurenamine	300.392	209.092	0.728334	0.0123109	0.00512988	0.000107856
467	Pos	1-Hydroxy-3,6,7-trimethoxy-2-(3-methyl-2-butenyl)-8-(3-hydroxy-3-methyl-1E-butenyl)-xanthone	104.637	455.204	0.726352	0.00329945	0.00145248	2.04959e-05
468	Pos	LysoPE(18:1(9Z)/0:0)	184.961	480.308	0.724443	0.103012	6.87245e-06	9.57585e-06
469	Pos	beta-Damascenone	139.907	191.143	0.72153	0.0266908	0.00832106	0.000144143
470	Pos	N-Acetylserine	168.117	148.06	0.71874	0.0479274	0.0106365	3.04778e-07
471	Pos	N-Acetyldehydroanonaine	396.727	306.118	0.718583	0.0147734	0.0064173	0.00409303
472	Pos	Dehydrophytosphingosine	140.826	316.284	0.71705	2.90369	0.250617	0.000115309
473	Pos	Cadabicine	482.958	436.218	0.71685	0.0491192	0.0346546	2.91365e-05
474	Pos	trans-Zeatin-O-glucoside riboside	84.1066	514.218	0.716377	0.0084055	0.00460017	0.000282345
475	Pos	p-Menth-1-en-4-ol	362.851	154.134	0.716094	0.0369491	0.0219289	3.14041e-05
476	Pos	Hyaluronic acid	411.414	426.16	0.715969	0.0481846	0.000203261	2.5999e-06
477	Pos	Ethyl trans-p-methoxycinnamate	30.2987	291.195	0.71249	0.303494	0.0136678	3.2003e-09
478	Pos	Hordatine B	172.608	581.334	0.706367	0.0161247	0.0113732	0.00826998
479	Pos	Methylimidazoleacetic acid	226.542	141.066	0.702235	0.212946	0.137443	0.000228254
480	Pos	L-2,3-Dihydrodipicolinate	78.4537	170.045	0.700486	0.148036	6.87245e-06	0.000453255
481	Pos	1,3,5-Trihydroxy-10-methylacridone	284.724	258.074	0.692358	0.0335987	0.00361986	0.0127486
482	Pos	Juglone glucoside	329.709	337.09	0.688981	0.0387062	0.015359	2.0269e-07
483	Pos	Glucosylsphingosine	63.8744	462.343	0.687907	0.0212546	5.10647e-05	1.12906e-06
484	Pos	Brassicanal B	172.589	234.062	0.687267	0.00756075	0.00337033	0.00262005
485	Pos	Theaspirone A	139.014	209.154	0.679963	0.206505	0.08572	0.000225103
486	Pos	4-O-alpha-D-Galactopyranosylcalystegine B2	427.144	338.145	0.679483	0.333709	0.0153827	7.41804e-05
487	Pos	N2-Fructopyranosylarginine	525.686	337.172	0.679209	0.0330858	0.0135505	6.68768e-05
488	Pos	Artemoin A	60.5107	551.503	0.678131	0.0225508	6.87245e-06	0.0132535
489	Pos	Tryptophyl-Tyrosine	415.906	368.155	0.676468	0.00739082	0.00107294	1.33016e-05
490	Pos	Sterebin A	91.1824	311.221	0.676224	0.244997	0.0547219	9.21134e-05
491	Pos	N-Benzoylaspartic acid	94.5173	238.071	0.671209	0.0397914	0.00551533	4.93038e-07
492	Pos	Aegle marmelos Alkaloid C	53.93	366.209	0.669522	0.0730046	0.00584075	0.0111599
493	Pos	LysoPC(P-16:0)	171.488	480.353	0.668729	0.117934	6.87245e-06	2.59706e-05
494	Pos	3',4',5'-Trimethoxytricetin 7-[rhamnosyl-(1->6)-glucoside]	236.614	653.207	0.664643	0.00059417	4.61826e-05	0.0233764
495	Pos	2-(Ethylamino)-4,5-dihydroxybenzamide	149.087	197.092	0.664485	0.0181865	0.00736909	0.00330088
496	Pos	Mangiferic acid	79.6121	281.247	0.664144	0.0170424	0.00277937	0.00521202
497	Pos	Methyl 2-furoate	310.467	127.039	0.662485	0.150391	0.00976404	0.00873965
498	Pos	2-[4-(3,4-Methylenedioxyphenyl)butyl]-4(1H)-quinolinone	346.33	322.149	0.658684	0.0766173	0.0261357	5.02759e-08
499	Pos	7-Hydroxy-5-methoxy-6,8-dimethylflavanone	197.457	299.128	0.656883	0.0261466	0.010286	1.53409e-05
500	Pos	N-Carbamoylputrescine	380.005	132.113	0.655952	0.536149	0.145619	4.39841e-07
501	Pos	5-Acetamidovalerate	285.851	160.097	0.654647	2.09887	1.37217	0.000725614
502	Pos	Prulaurasin	341.908	318.095	0.653552	0.0973194	0.000633603	8.48712e-05
503	Pos	xi-3-(4-Isopropylphenyl)-2-methylpropanal	189.437	191.143	0.648195	0.0496724	0.0284767	2.39394e-05
504	Pos	(3beta,5alpha,6beta,22E,24R)-23-Methylergosta-7,22-diene-3,5,6-triol	32.8483	445.368	0.646795	0.025182	6.87245e-06	1.26409e-06
505	Pos	4,5-Dimethyloxazole	411.394	98.0604	0.645448	0.0471282	0.0210639	9.63119e-05
506	Pos	Linoleamide	140.984	280.263	0.644981	0.0378854	0.00174949	0.000126273
507	Pos	Citroside A	217.512	387.201	0.643915	0.00500914	0.00317077	0.000878607
508	Pos	Fumitremorgin C	462.409	380.203	0.638313	0.0138772	0.00234648	0.000104407
509	Pos	Cyanidin 3-glucoside	224.289	449.107	0.637949	10.4216	0.0258459	0.000115472
510	Pos	Pipernonaline	77.6224	364.187	0.63569	0.00679943	0.00264847	0.0104928
511	Pos	Hypoglycin B	394.578	271.129	0.634942	0.0167281	0.00520308	1.05802e-07
512	Pos	Mangiferdesmethylursanone	29.2231	429.372	0.632055	0.0554861	3.06179e-05	5.61862e-05
513	Pos	Fast green FCF	253.423	765.165	0.629286	0.00699759	0.000467224	0.040225
514	Pos	xi-2-Mercapto-3-methyl-1-butanol	77.889	121.069	0.628474	0.071901	0.0206588	1.55299e-05
515	Pos	(3S,5R,6R,6'S)-6,7-Didehydro-5,6-dihydro-3,5,6'-trihydroxy-13,14,20-trinor-3'-oxo-beta,epsilon-caroten-19',11'-olide 3-acetate	254.655	629.333	0.627844	0.00535855	0.000113428	5.8092e-08
516	Pos	3-O-Methylniveusin A	138.699	409.183	0.62721	0.0213638	0.0122984	0.000321224
517	Pos	2-Hydroxy-6-(8-tridecenyl)benzoic acid	29.6839	319.226	0.626144	0.015981	0.00265374	0.00139824
518	Pos	Homocitrulline	348.644	190.119	0.622773	0.083958	0.0120495	0.0151684
519	Pos	Cortisone	139.318	361.208	0.622732	0.0222002	0.0126982	0.000421946
520	Pos	2-Acetylpyrrolidine	112.155	114.091	0.619363	0.147499	0.0817053	4.216e-05
521	Pos	Dhurrin	150.791	334.092	0.618331	0.113103	0.0106895	0.000599536
522	Pos	N-(2R-Hydroxydocosanoyl)-2S-amino-1,3S,4R-octadecanetriol	120.186	656.609	0.612479	0.00566902	6.87245e-06	2.38083e-06
523	Pos	Aureol	221.423	285.039	0.610948	0.012312	0.000118933	7.40391e-06
524	Pos	Montecristin	215.745	575.503	0.609929	0.0111148	1.85119e-05	0.000230471
525	Pos	3-Hydroxyadipic acid 3,6-lactone	257.43	145.049	0.609285	1.65719	0.463682	0.041791
526	Pos	2-acetyl-1-alkyl-sn-glycero-3-phosphocholine	210.712	524.37	0.606745	0.0102709	6.87245e-06	0.000270857
527	Pos	O-propanoyl-carnitine	237.695	218.139	0.606193	0.0429559	0.0283795	0.000350836
528	Pos	Capsiamide	146.632	270.279	0.605683	0.00295545	6.87245e-06	0.000244694
529	Pos	Mandelonitrile rutinoside	96.8984	442.171	0.601705	0.0371725	0.0126129	0.000198777
530	Pos	6-(alpha-D-Glucosaminyl)-1D-myo-inositol	426.075	342.139	0.598192	0.089713	0.0150554	4.0897e-09
531	Pos	5-Amino-3-oxohexanoate	364.322	146.081	0.596123	16.9127	12.9595	0.00127087
532	Pos	N-Oleoylethanolamine	184.94	326.305	0.59343	0.00843178	6.87245e-06	3.18376e-06
533	Pos	(2'E,4'Z,7'Z,8E)-Colnelenic acid	153.079	293.211	0.591696	0.0573875	0.0221258	0.0023833
534	Pos	2-Phenylethyl 3-methylbutanoate	140.136	207.138	0.585119	0.123969	0.0716377	0.0033101
535	Pos	3-Oxo-alpha-ionol 9-[apiosyl-(1->6)-glucoside]	190.601	503.249	0.58369	0.00365612	0.00170046	0.000491013
536	Pos	PC(20:1(11Z)/14:0)	160.298	760.584	0.583474	0.182047	6.87245e-06	3.95944e-05
537	Pos	PC(15:0/15:0)	165.87	706.537	0.581572	0.0439365	6.87245e-06	2.87884e-05
538	Pos	5-Methyldeoxycytidine	173.711	242.113	0.578728	0.00138362	0.000458604	0.000112394
539	Pos	6-Methylcoumarin	155.823	161.06	0.578683	0.0883999	0.0403443	0.000362063
540	Pos	Dihydro-2,4-dimethyl-6-(1-methylpropyl)-4H-1,3,5-dithiazine	273.526	206.1	0.57723	0.332482	0.0680549	7.92328e-05
541	Pos	Threoninyl-Serine	459.994	207.097	0.570727	0.186725	0.044495	0.000137277
542	Pos	PC(18:3(6Z,9Z,12Z)/18:1(11Z))	159.183	782.569	0.570034	0.0383346	6.87245e-06	0.000138214
543	Pos	6,10,14-Trimethyl-5,9,13-pentadecatrien-2-one	32.5704	263.237	0.56789	0.0908959	0.00865532	7.99239e-06
544	Pos	PC(20:3(5Z,8Z,11Z)/16:0)	158.077	784.583	0.567279	0.0328852	6.87245e-06	9.9657e-05
545	Pos	PC(20:2(11Z,14Z)/14:0)	131.131	758.568	0.56637	0.104393	6.87245e-06	0.00690324
546	Pos	Dehydroisochalciporone	303.751	242.15	0.566027	0.00589103	0.00190478	0.000165291
547	Pos	Oxonantenine	394.57	336.087	0.565609	0.00580463	0.000274634	4.70025e-05
548	Pos	Tetrahydrocortisone	75.1101	365.232	0.56546	0.012511	0.00197902	0.00664002
549	Pos	Dimethylstrobochrysin	180.45	297.116	0.56494	0.0070551	0.000707023	0.0312842
550	Pos	Atrovirinone	186.088	457.186	0.561774	0.00616943	0.00197864	2.39506e-06
551	Pos	4-(Methylnitrosamino)-1-(3-pyridyl)-1-butanol glucuronide	369.732	386.165	0.561716	0.0296837	0.000759514	0.000105898
552	Pos	Prolylhydroxyproline	431.631	229.118	0.559575	0.0235613	0.0156892	9.9029e-06
553	Pos	2-Hydroxycinnamic acid	311.198	165.054	0.555866	0.956281	0.19999	1.53833e-07
554	Pos	Galactosylsphingosine	121.354	462.342	0.555226	0.0457307	2.49956e-05	0.00048886
555	Pos	2-Ethoxy-4-(4-methyl-1,3-dioxolan-2-yl)phenol	77.2735	225.112	0.555088	0.0317321	0.00656335	0.000643768
556	Pos	Asparaginyl-Methionine	182.797	264.108	0.552782	0.0404136	0.0026488	6.3162e-06
557	Pos	N'-Hydroxyneosaxitoxin	289.202	332.134	0.550143	0.317755	0.0212874	0.000206257
558	Pos	Avocadenofuran	27.3674	249.221	0.5475	0.0796975	0.000757147	0.0010307
559	Pos	N-Acetyldopamine	285.829	196.097	0.546084	0.0428308	0.0285884	0.00781774
560	Pos	Tetrahydropentoxyline	311.565	367.15	0.543286	0.0718917	0.000565666	0.000104583
561	Pos	Myricatomentoside I	186.052	505.206	0.542916	0.0137374	0.00375046	6.09724e-07
562	Pos	4',7-Dihydroxy-6-methoxyisoflavan	186.067	273.112	0.541644	0.0145707	0.00397975	2.1118e-05
563	Pos	Cyclopassifloside X	153.829	699.434	0.541165	0.00359312	0.000312695	0.00233638
564	Pos	PC(18:3(9Z,12Z,15Z)/14:0)	76.2506	728.531	0.540273	0.00539999	6.87245e-06	5.16919e-05
565	Pos	3-Mercapto-3-methyl-1-butanol	365.11	121.069	0.536784	0.0348735	0.0236327	0.0011026
566	Pos	Gentiotriose	462.73	505.177	0.535826	0.00101199	0.000259171	0.000939092
567	Pos	1-Methyladenosine	448.523	282.118	0.535733	0.0382156	0.013249	0.00875692
568	Pos	2'-Oxoaloesol 7-glucoside	155.869	395.131	0.534868	0.0242792	0.0143808	0.000161746
569	Pos	Corchoroside B	524.538	519.302	0.533848	0.0038449	0.000180476	4.37949e-05
570	Pos	Austrobailignan 7	186.258	343.154	0.532845	0.0532341	0.0193445	9.01072e-05
571	Pos	4-Pyridoxic acid	143.275	184.064	0.532844	3.14521	2.20242	0.00677237
572	Pos	5-O-Methylembelin	190.565	309.206	0.530449	0.0155866	0.00202121	0.000115848
573	Pos	4'-Methyl-(-)-epigallocatechin 3-(4-methyl-gallate)	192.78	487.121	0.529763	0.0109936	0.00047786	4.41579e-05
574	Pos	Caryophyllene alpha-oxide	104.272	221.19	0.528732	0.0283498	0.0170801	0.00509146
575	Pos	Tamarixetin	56.0103	317.065	0.527182	0.0224825	0.00315358	0.000742778
576	Pos	3-[(3-Methylbutyl)nitrosoamino]-2-butanone	473.546	187.144	0.524999	0.0530964	0.0250449	0.000676979
577	Pos	Mangiferin 6'-gallate	177.1	575.118	0.523566	0.00887291	0.00474969	0.00186049
578	Pos	2-O-Caffeoyltartronic acid	178.267	283.05	0.522336	0.00401404	0.00269432	0.000276707
579	Pos	ent-1(10)-Halimene-15,19-dioic acid	62.7527	337.235	0.521994	0.0581872	0.00269344	1.14288e-05
580	Pos	Rutacridone	372.147	308.134	0.521188	0.052258	0.0106107	0.000305017
581	Pos	Arborine	162.068	251.114	0.519003	0.0110163	0.00536458	0.0002549
582	Pos	Celastrol	33.09	451.291	0.517861	0.00535911	3.21303e-05	0.00125302
583	Pos	(2beta,3alpha,9alpha,24R)-Ergosta-7,22-diene-2,3,9-triol	29.5675	431.351	0.516432	0.222144	0.000368762	0.000407793
584	Pos	Threoninyl-Leucine	262.141	233.15	0.516326	0.126492	0.0406785	1.00352e-05
585	Pos	Panaquinquecol 1	32.6028	293.21	0.516011	4.55295	0.188234	0.019252
586	Pos	(R)-2-Acetoxy-p-mentha-1,8-diene	96.9042	195.138	0.515375	0.234565	0.0933568	0.000951325
587	Pos	Dihydromarasmone	435.057	281.142	0.514655	0.0125712	0.00368288	0.000925874
588	Pos	Methionyl-Asparagine	242.212	264.108	0.513781	0.0059183	0.00225913	0.0051454
589	Pos	Cyclic AMP	371.606	330.058	0.51137	0.0245445	0.00666823	0.0160169
590	Pos	6''-O-Malonyldaidzin	224.272	503.116	0.509986	0.00708021	0.000187269	3.57906e-05
591	Pos	L-Carnitine	359.848	162.112	0.509828	0.632799	0.440886	0.000120907
592	Pos	Egonol glucoside	99.4684	489.175	0.50765	0.00165913	0.000669668	0.000610687
593	Pos	5'-Deoxy-5'-(methylsulfinyl)adenosine	231.77	314.092	0.50763	0.00167272	6.87245e-06	0.00186888
594	Pos	LysoPC(20:0/0:0)	208.62	552.402	0.501247	0.00267892	6.87245e-06	0.000481694
595	Pos	(Z)-N-Feruloyl-5-hydroxyanthranilic acid	453.07	330.093	0.499303	0.0244302	0.00407948	0.000190007
596	Pos	2-Ethylfuran	32.4778	97.0651	0.499133	0.00970882	0.00620966	0.000172992
597	Pos	2',4,4'-Trihydroxy-6'-methoxy-3',5'-diprenylchalcone	490.512	423.209	0.498911	0.00455991	0.000181657	0.00010047
598	Pos	Estriol	30.2957	289.179	0.498749	0.0104329	0.000152182	0.00348403
599	Pos	Methylgingerol	62.5839	309.206	0.498525	0.236132	0.00132502	0.00349186
600	Pos	MG(18:3(6Z,9Z,12Z)/0:0/0:0)	43.9085	353.268	0.497271	0.0472105	0.000722758	0.00225041
601	Pos	PC(22:1(13Z)/14:1(9Z))	158.075	786.6	0.495345	0.0333335	6.87245e-06	5.35331e-05
602	Pos	4-(2-Aminophenyl)-2,4-dioxobutanoic acid	380.01	208.061	0.487782	0.0125666	0.00926604	0.00318625
603	Pos	Citrulline	400.198	176.103	0.487364	2.10537	0.860411	1.19454e-07
604	Pos	(3b,6b,8a,12a)-8,12-Epoxy-7(11)-eremophilene-6,8,12-trimethoxy-3-ol	91.161	327.216	0.487067	0.0104256	0.00602999	0.000624754
605	Pos	Gibberellin A43	447.952	395.166	0.481505	0.00765457	0.000881474	0.000179967
606	Pos	Artonol D	184.964	499.166	0.481273	0.0043713	0.00110126	0.00119528
607	Pos	cis-Acetylacrylate	256.378	115.039	0.480867	0.180628	0.0510491	0.0484391
608	Pos	Niazirinin	184.94	322.128	0.47965	0.0198709	5.90036e-05	8.25726e-06
609	Pos	(7R*,8R*)-3-Methoxy-3',4,7,9,9'-pentahydroxy-8,4'-oxyneolignan 4-xyloside	376.685	497.198	0.477978	0.00570105	0.00331405	0.0002136
610	Pos	Malonylcarnitine	91.4599	248.113	0.47769	0.0536769	0.0242863	4.32307e-06
611	Pos	2-Acetyl-1,5,6,7-tetrahydro-6-hydroxy-7-(hydroxymethyl)-4H-azepine-4-one	385.505	200.092	0.476131	0.0160562	0.0099025	0.000195327
612	Pos	Calystegine C1	346.33	192.087	0.476058	0.0179714	0.00622601	3.35886e-07
613	Pos	Sedanonic acid	90.0149	211.133	0.472931	0.500492	0.17703	0.000318681
614	Pos	Neuraminic acid	468.236	268.103	0.467963	0.0172494	0.00633642	0.00575415
615	Pos	5-O-Desmethyldonepezil	37.7413	366.209	0.461769	0.0378791	0.0027457	0.00101211
616	Pos	Vomifoliol 9-[xylosyl-(1->6)-glucoside]	217.512	519.244	0.461069	0.00184212	0.000920766	5.29199e-06
617	Pos	Simulansamide	428.219	398.166	0.45911	0.0107494	0.0026689	2.27999e-07
618	Pos	N-Carbamoyl-2-amino-2-(4-hydroxyphenyl)acetic acid	409.174	211.071	0.453064	0.156887	0.00932675	9.80379e-05
619	Pos	Isoniazid alpha-ketoglutaric acid	248.948	266.074	0.451729	0.0251689	0.00152466	0.000427067
620	Pos	1,3,5-Bisabolatrien-10-one	494.933	219.17	0.451496	0.0761777	0.0467308	5.21074e-05
621	Pos	6-O-Acetylaustroinulin	35.0406	365.268	0.448272	0.0279085	0.000403749	0.000126477
622	Pos	Acetoacetic acid	77.3088	103.039	0.447038	0.207344	0.00296096	2.02983e-05
623	Pos	Ganoderiol D	35.0918	489.358	0.444434	0.0274427	0.00071986	0.00217475
624	Pos	N-[[3-Hydroxy-2-(2-pentenyl)cyclopentyl]acetyl]isoleucine	95.2306	326.232	0.444286	0.0153578	0.00285754	3.57132e-05
625	Pos	Ciceritol	107.645	519.186	0.44284	0.00819555	0.00317642	0.000462371
626	Pos	9-Hydroxy-4-methoxypsoralen	144.96	233.05	0.436464	0.0955844	0.00922377	0.0054939
627	Pos	PE(22:4(7Z,10Z,13Z,16Z)/14:1(9Z))	53.6897	738.505	0.43602	0.00146542	6.87245e-06	0.00421073
628	Pos	Glucosylisomaltol	153.426	289.091	0.435739	0.0597215	0.020249	0.001139
629	Pos	Eremopetasinorone A	128.933	207.138	0.434843	0.646777	0.407295	0.000591557
630	Pos	6-Lactoyltetrahydropterin	456.579	240.108	0.433879	0.0212407	0.00649304	0.00153904
631	Pos	Isoeugenol phenylacetate	344.166	283.14	0.429562	0.0198015	0.00211671	1.17135e-05
632	Pos	4-(Glutamylamino) butanoate	429.342	233.113	0.429364	0.0474788	0.0348623	0.000501858
633	Pos	L-Galactose	258.527	198.097	0.427676	2.28006	0.195851	8.69444e-05
634	Pos	2,3,5,6,8,8a-Hexahydro-2,5,5,8a-tetramethyl-7H-1-benzopyran-7-one	89.6139	209.154	0.426022	0.133353	0.052418	6.64345e-05
635	Pos	Aspartyl-Isoleucine	391.205	247.129	0.424516	0.101178	0.0435093	0.000369264
636	Pos	(3S,7E,9S)-9-Hydroxy-4,7-megastigmadien-3-one 9-glucoside	90.8243	371.206	0.423522	0.0633056	0.02063	3.39561e-08
637	Pos	Cysteinyl-Asparagine	309.268	236.076	0.422931	0.0203966	0.000601745	3.07634e-06
638	Pos	Distichonic acid A	409.193	295.113	0.420975	1.55421	0.0767057	4.58191e-05
639	Pos	Tetramethylsilane	53.7251	301.147	0.412863	0.0143983	0.000109737	3.08089e-06
640	Pos	5-Nonadecyl-1,3-benzenediol	238.698	415.302	0.407437	0.00379786	0.002046	2.5465e-06
641	Pos	2,6-Dimethoxy-4-propylphenol	130.15	197.117	0.406126	0.0294225	0.0133147	0.0114839
642	Pos	Marminal	410.267	273.108	0.401611	0.558698	0.00923895	0.00764329
643	Pos	Avenalumin III	445.213	292.102	0.401364	0.0183764	0.00139927	0.0351758
644	Pos	C.I. Food Red 6	199.496	451.066	0.398769	0.0201929	6.09963e-05	0.00200779
645	Pos	Cibaric acid	94.6156	325.201	0.398187	0.00722772	0.00141666	0.000154194
646	Pos	1-(2,6-Dihydroxy-4-methoxyphenyl)-3-phenyl-1-propanone	447.473	273.108	0.394431	0.13607	0.00857434	0.0407886
647	Pos	Graveoline	394.56	280.092	0.392734	0.152811	0.0104368	2.40313e-08
648	Pos	Flazine methyl ether	440.591	323.109	0.389761	0.0235672	0.00010449	0.000572235
649	Pos	Linalyl phenylacetate	72.8907	273.185	0.388346	0.0367693	0.00177453	0.0131561
650	Pos	Isotrichodermin	128.993	293.171	0.387355	0.0338481	0.0088409	7.47654e-05
651	Pos	Glutamylglutamic acid	475.855	277.103	0.387158	0.102346	0.0406891	0.00372002
652	Pos	Cucurbic acid	97.536	213.148	0.384099	0.0755031	0.0276739	0.000426388
653	Pos	Cysteinyl-Glutamine	468.187	250.092	0.380153	0.0179833	0.0049704	0.00201541
654	Pos	Helinorbisabone	337.407	251.124	0.379759	0.0370363	0.00342623	0.000154754
655	Pos	N-Succinyl-L,L-2,6-diaminopimelate	494.216	291.118	0.375813	0.0171739	0.00223011	0.0399145
656	Pos	Abscisic acid	368.804	265.139	0.370029	0.446279	0.0148752	1.34851e-05
657	Pos	Methyl 2,3-dihydro-3,5-dihydroxy-2-oxo-3-indoleacetic acid	371.046	238.071	0.368177	0.0365287	0.0176812	6.41842e-08
658	Pos	S-Acetyldihydrolipoamide-E	447.711	250.092	0.367621	0.025229	0.00721129	3.06026e-07
659	Pos	Citalopram aldehyde	178.906	296.113	0.367208	0.0984096	0.000820215	4.11781e-06
660	Pos	Sphinganine	115.469	302.305	0.361613	0.266906	0.00370536	1.41515e-07
661	Pos	Galactan	191.685	533.2	0.361084	0.00370832	0.00219989	0.000112884
662	Pos	N-gamma-L-Glutamyl-D-alanine	297.622	219.098	0.360264	0.0096363	0.00395888	0.0140652
663	Pos	1-(5-Acetyl-2-hydroxyphenyl)-3-methyl-1-butanone	454.204	221.113	0.359629	0.253669	0.108195	0.00866148
664	Pos	N1-(2,4-Dimethoxybenzyl)-n2-(2-(pyridin-2-yl) ethyl)oxalamide	86.5434	344.17	0.3588	0.946088	0.0128271	2.22322e-05
665	Pos	alpha-Rhamnorobin	192.794	433.112	0.354283	5.35187	0.0103734	4.14202e-05
666	Pos	AS 1-5	62.7403	716.566	0.354156	0.125588	6.87245e-06	1.04411e-05
667	Pos	2-Butylbenzothiazole	369.921	192.087	0.353946	0.0221779	0.0127051	0.000296862
668	Pos	Culinariside	122.193	802.638	0.350731	0.0228464	6.87245e-06	1.47123e-05
669	Pos	Corchorifatty acid A	91.1583	309.206	0.349764	0.057111	0.0138195	0.000166739
670	Pos	Dehydrovomifoliol	47.226	223.133	0.349525	0.0858777	0.00391249	0.00607707
671	Pos	Methyl dihydrojasmonate	94.9903	227.164	0.347869	0.0100838	0.00591978	0.000886231
672	Pos	(2S,4R,5S)-Muscarine	348.644	174.149	0.346861	0.0339527	0.0100432	0.00130984
673	Pos	Juzirine	397.943	282.118	0.342153	0.0926216	0.0110303	7.82471e-05
674	Pos	Kinetin	397.937	216.087	0.341883	0.141021	0.0187006	6.12292e-05
675	Pos	PC(24:1(15Z)/14:0)	119.778	816.654	0.337519	0.161464	6.87245e-06	0.000149728
676	Pos	Palmitic acid	122.193	274.274	0.336682	0.00422883	0.000977679	2.76406e-05
677	Pos	N-Acetyl-a-neuraminic acid	428.238	310.113	0.33438	0.195685	6.87245e-06	3.8378e-05
678	Pos	Picrotin	187.024	311.112	0.333398	0.0108487	0.0034085	1.90353e-08
679	Pos	z-Clausenamide	218.642	280.139	0.331659	0.0717256	0.0128945	1.44274e-05
680	Pos	5C-aglycone	505.146	273.108	0.330841	0.0150546	0.00166212	4.6675e-07
681	Pos	Marmesin rhamnoside	82.8755	393.151	0.327297	0.0586106	0.0354139	1.28077e-05
682	Pos	Fructosamine	90.0094	180.086	0.327177	3.41804	0.0299724	1.53379e-06
683	Pos	Palmitoleoyl Ethanolamide	141.12	298.274	0.32555	0.0743851	0.00447603	0.000177776
684	Pos	9,10-epoxyoctadecanoic acid	79.7902	299.258	0.323026	0.0576837	0.00997367	0.00669778
685	Pos	Kelampayoside A	156.941	479.187	0.321914	0.00332771	0.00166671	0.000600022
686	Pos	5-(3E-Pentenyl)tetrahydro-2-oxo-3-furancarboxylic acid	308.829	199.101	0.320577	0.0735512	0.0204315	6.59041e-08
687	Pos	Murrayamine A	374.408	280.139	0.319836	0.143112	0.0188629	4.4473e-05
688	Pos	1,7-Dimethylguanosine	414.799	312.129	0.319247	0.0346943	0.00514109	0.000105268
689	Pos	gamma-Glutamylglutamic acid	438.645	277.103	0.317417	0.0207861	0.0074513	2.03306e-05
690	Pos	5-De-O-methyltoddanol	409.193	277.103	0.312868	0.461132	0.0265126	6.39663e-05
691	Pos	L-beta-aspartyl-L-alanine	446.386	205.082	0.311597	0.01886	0.00759595	0.00235277
692	Pos	2-Phenylethyl benzoate	395.709	227.103	0.309011	0.0167433	0.00835931	1.10968e-06
693	Pos	Melleolide H	342.479	431.214	0.303675	0.0103972	0.000391635	1.9366e-07
694	Pos	3-Methyl-1-(2,4,6-trihydroxyphenyl)-1-butanone	156.302	211.096	0.300913	0.0299903	0.0130707	0.000552194
695	Neg	Pyrocatechol+B31B2:B30	39.6268	109.028	0.999414	1.9898	42.5434	0.00094968
696	Neg	D-Ornithine	513.231	131.082	0.942997	0.00218864	1.69608	3.47773e-05
697	Neg	Indolelactic acid	177.948	204.066	0.928677	7.85038	25.9909	0.00790725
698	Neg	O-Desmethylnaproxen	24.3573	215.073	0.92646	0.0213908	7.34383	6.66076e-05
699	Neg	3-Methylcrotonylglycine	254.824	156.066	0.901066	0.329986	3.54589	4.07852e-06
700	Neg	Sucrose	374.786	341.109	0.880795	6.87814	227.327	9.77176e-09
701	Neg	(-)-Epigallocatechin	38.5611	305.069	0.879335	0.0562738	1.0147	0.000231183
702	Neg	Ascochitine	30.0783	275.095	0.849454	0.0180795	2.70635	0.000320014
703	Neg	Chorismate	82.0182	225.044	0.834754	0.00218864	0.977736	2.78029e-05
704	Neg	Alternariol	328.944	257.043	0.832427	0.212188	0.559717	0.039206
705	Neg	Rhamnose	180.114	163.06	0.826663	0.00218864	19.9556	0.000919767
706	Neg	Kynurenic acid	215.641	188.035	0.787939	0.00218864	0.0505055	8.06512e-09
707	Neg	Cortexolone	199.908	381.177	0.771546	0.0182723	0.195059	4.68599e-06
708	Neg	3-(3,4-Dihydroxy-5-methoxy)-2-propenoic acid	93.6594	209.045	0.751454	0.0629159	0.492353	4.57458e-05
709	Neg	D-Sedoheptulose 7-phosphate	30.2454	289.039	0.70542	0.0586384	2.51563	6.88138e-05
710	Neg	(2E)-1-(2-hydroxy-3,4-dimethoxyphenyl)-3-phenylprop-2-en-1-one	177.89	283.104	0.697364	0.00218864	4.45954	4.61012e-06
711	Neg	3-Methyladipic acid	328.874	159.065	0.69108	2.83641	50.8616	3.61572e-08
712	Neg	N,N'-diacetylchitobiose	109.236	423.17	0.670891	0.0711009	0.266712	0.000559032
713	Neg	Licochalcone A	141.971	337.151	0.654317	0.0214998	0.565253	1.2171e-10
714	Neg	Tyrosol	42.6297	137.06	0.614378	0.00218864	5.41397	0.00380479
715	Neg	Liquiritin apioside	501.691	531.157	0.612343	0.00231488	0.00946411	0.000317416
716	Neg	Hexamethylquercetagetin	374.857	401.13	0.612265	3.8351	64.4095	2.15679e-08
717	Neg	3,4,5-Trimethoxycinnamic acid	185.869	237.077	0.552578	0.772747	2.32845	0.0251501
718	Neg	3-Nitrotyrosine	36.9282	225.049	0.548681	0.00574875	2.51796	6.31972e-05
719	Neg	Xanthohumol	153.869	353.146	0.473868	0.752609	4.37886	1.7636e-05
720	Neg	Estriol	205.211	287.161	0.47018	0.00316303	0.187491	0.00118302
721	Neg	Deoxyuridine	430.668	263.041	0.449758	0.00428094	0.0834583	1.18878e-08
722	Neg	Orotidylic acid	31.5197	367.013	0.436491	0.102702	12.2163	2.22739e-05
723	Neg	1-Octen-3-yl primeveroside	289.48	467.225	0.35672	0.00218864	0.0367158	5.36669e-08
724	Neg	Isopentenyl pyrophosphate	404.639	244.997	0.304787	0.00218864	0.120486	0.00040803
Mass error: the scoring of the secondary match and takes the value [0, 1], closer to 1 means higher accuracy.
